# Supplementary material for: An operationally simple approach to (E)-α-halo vinyl sulfides and their applications for accessing stereodefined trisubstituted alkenes
Source: Royal Society of Chemistry journal article supplement (doi:10.1039/c3ob27307e), 2013-01-01

## Supporting Materials to

An operationally simple approach to (*E*)- $\alpha$ -halo vinyl sulfides and their  
applications for accessing stereodefined trisubstituted alkenes

Zhaozhen Yang, Xiaoyi Chen, Wei Kong, Siyuan Xia, Renwei Zheng, Fang Luo, and  
Ganguo Zhu\*

*Department of Chemistry, Zhejiang Normal University, 688 Yingbin Road, Jinhua  
321004, PR China*

### Table of Contents

|                                                                                                 |         |
|-------------------------------------------------------------------------------------------------|---------|
| NMR spectra.....                                                                                | S2-S68  |
| Studies on stereochemistry of <b>5d</b> , <b>5l</b> , <b>5w</b> , <b>7h</b> and <b>7n</b> ..... | S69-S71 |
| X-Ray data of <b>3s</b> .....                                                                   | S72-S74 |

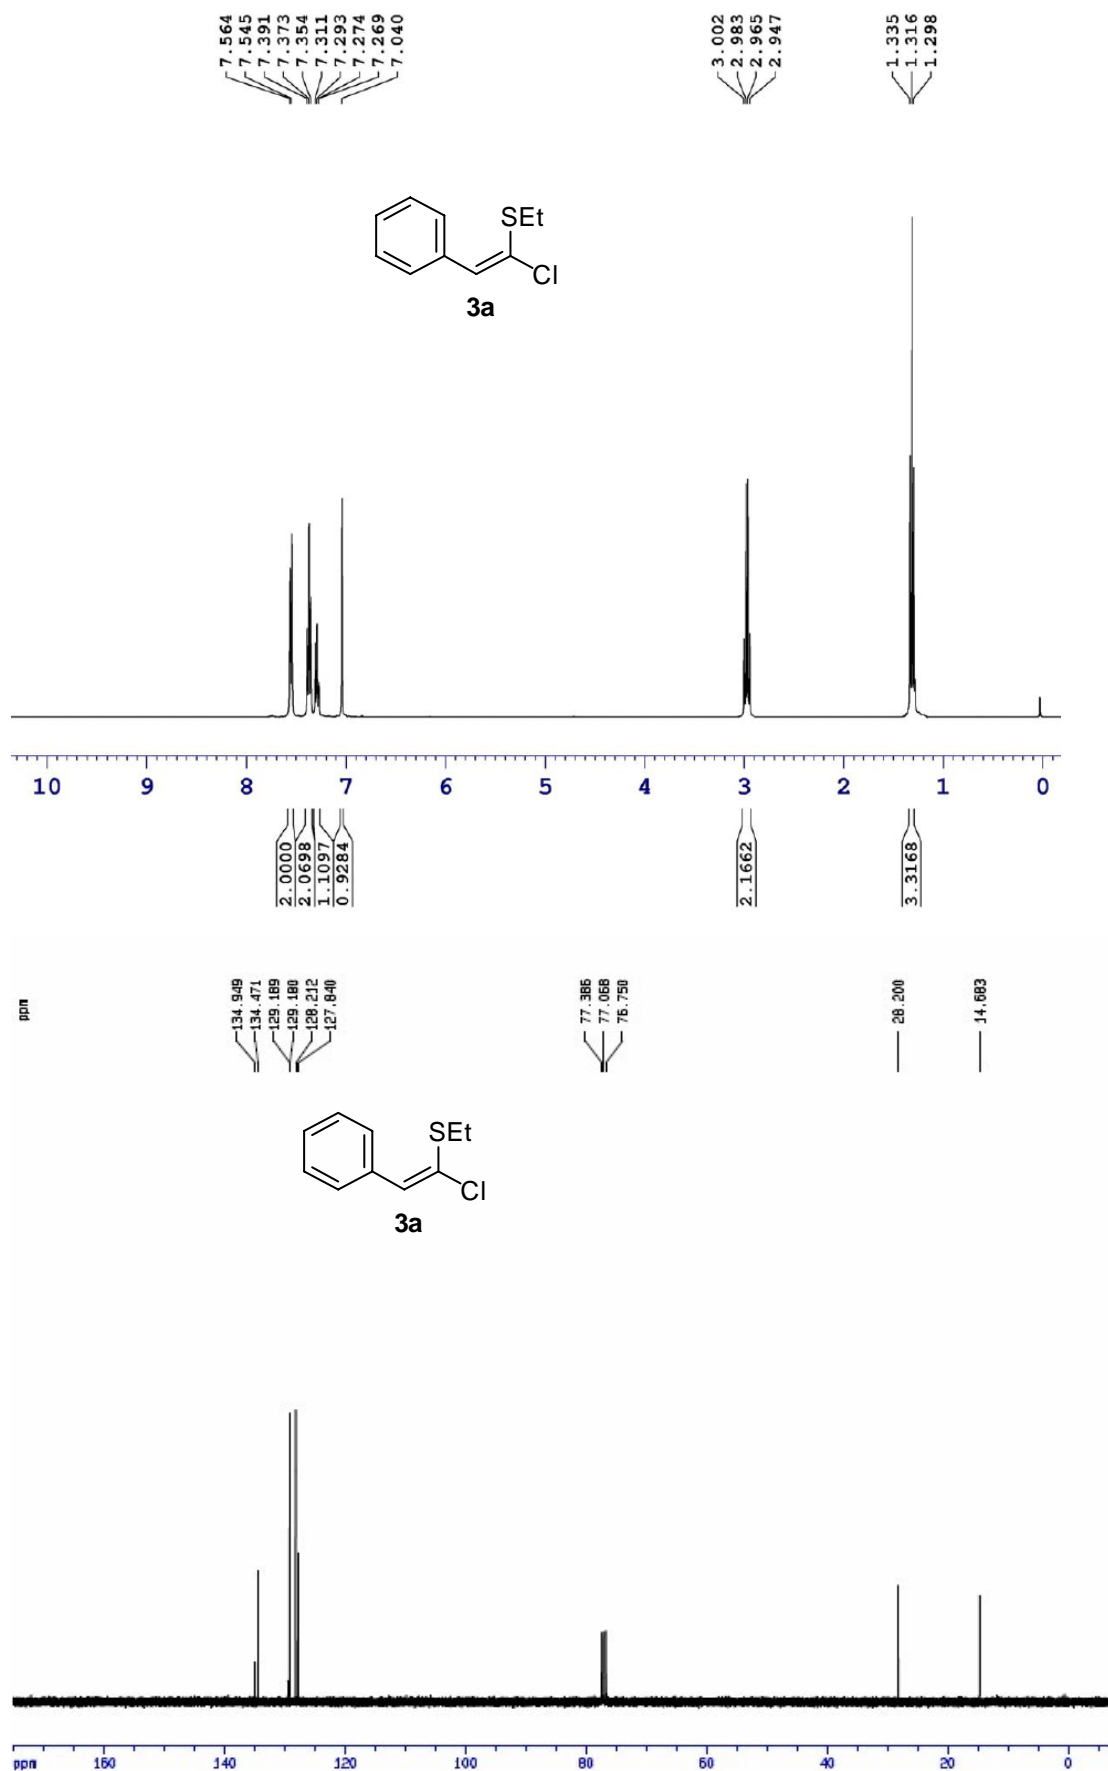

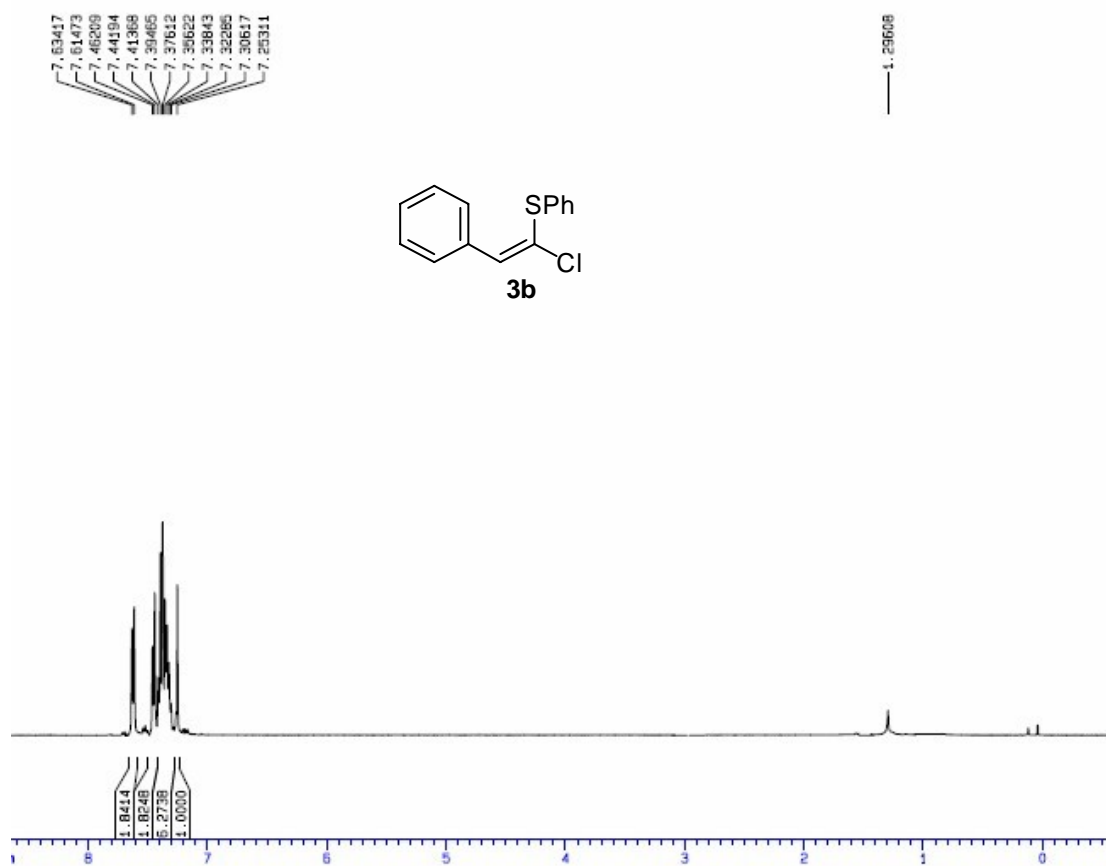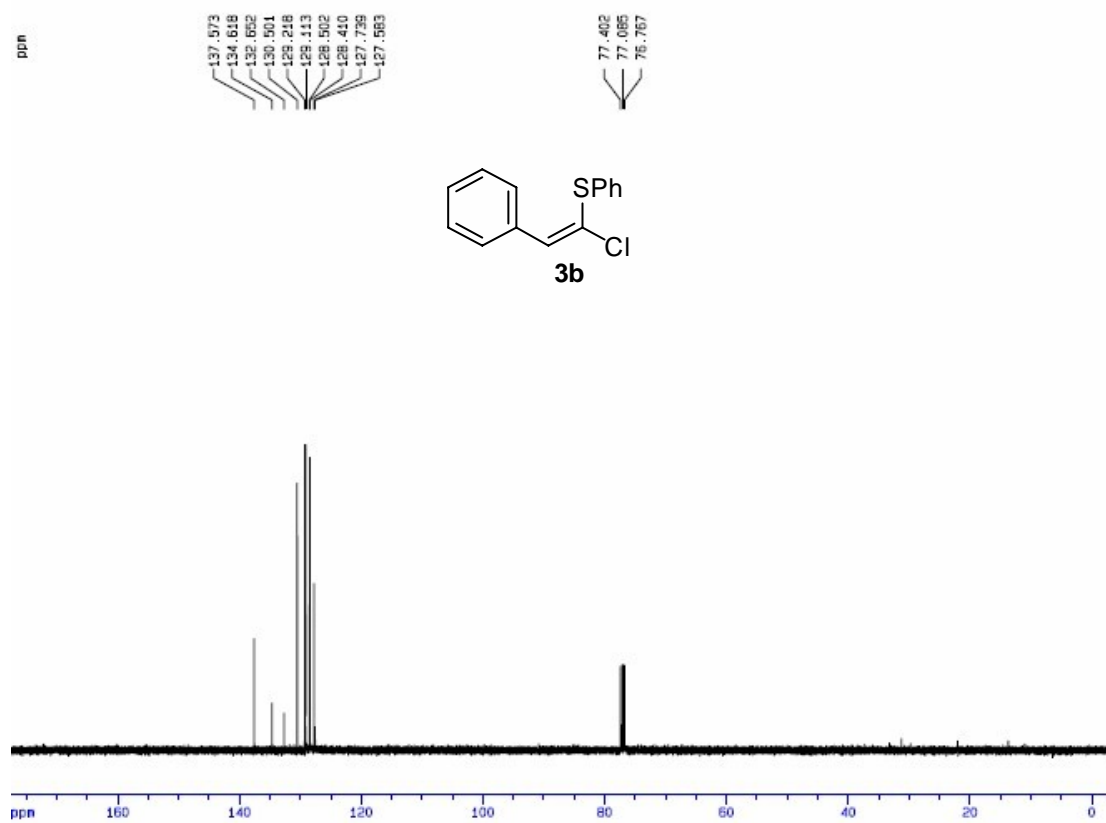

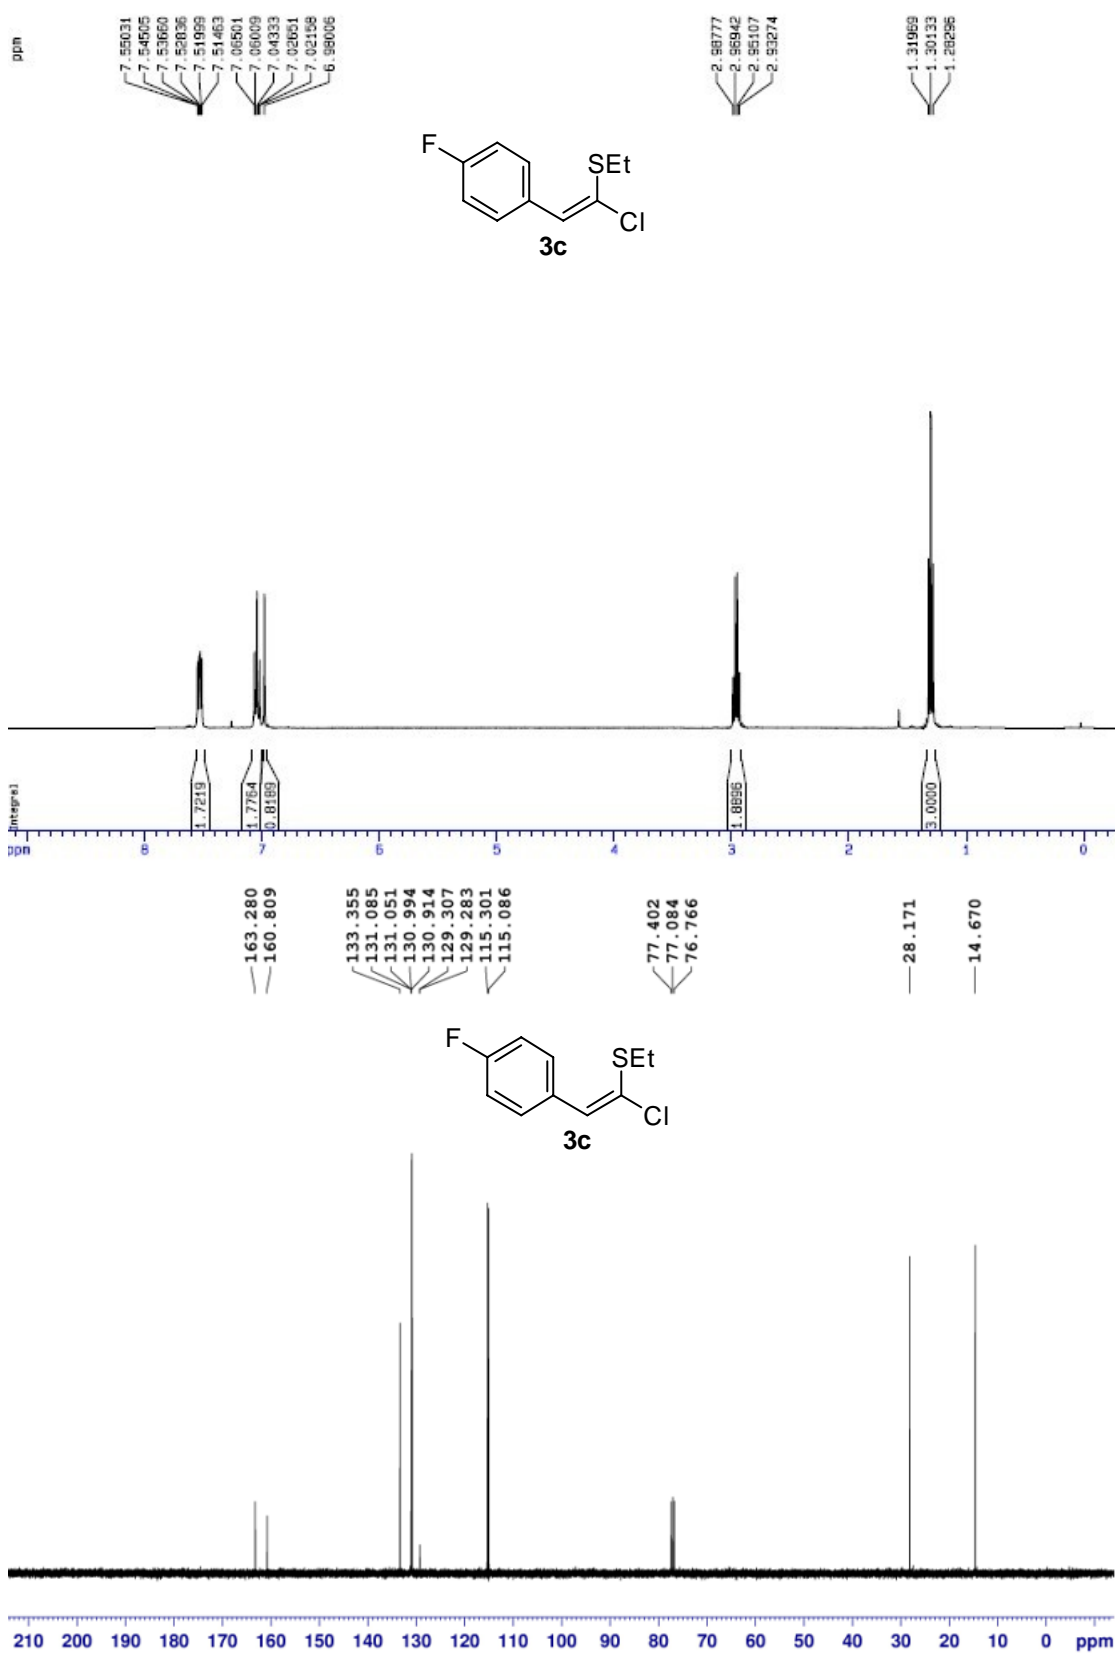

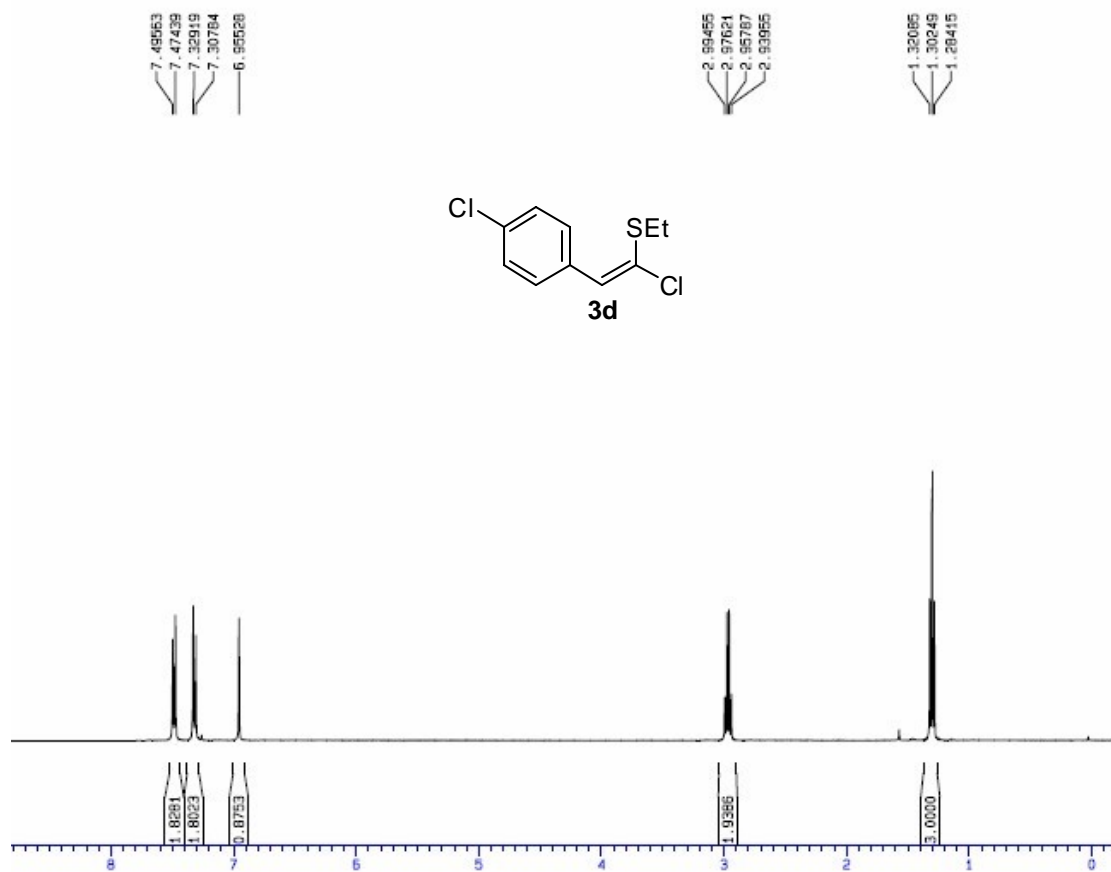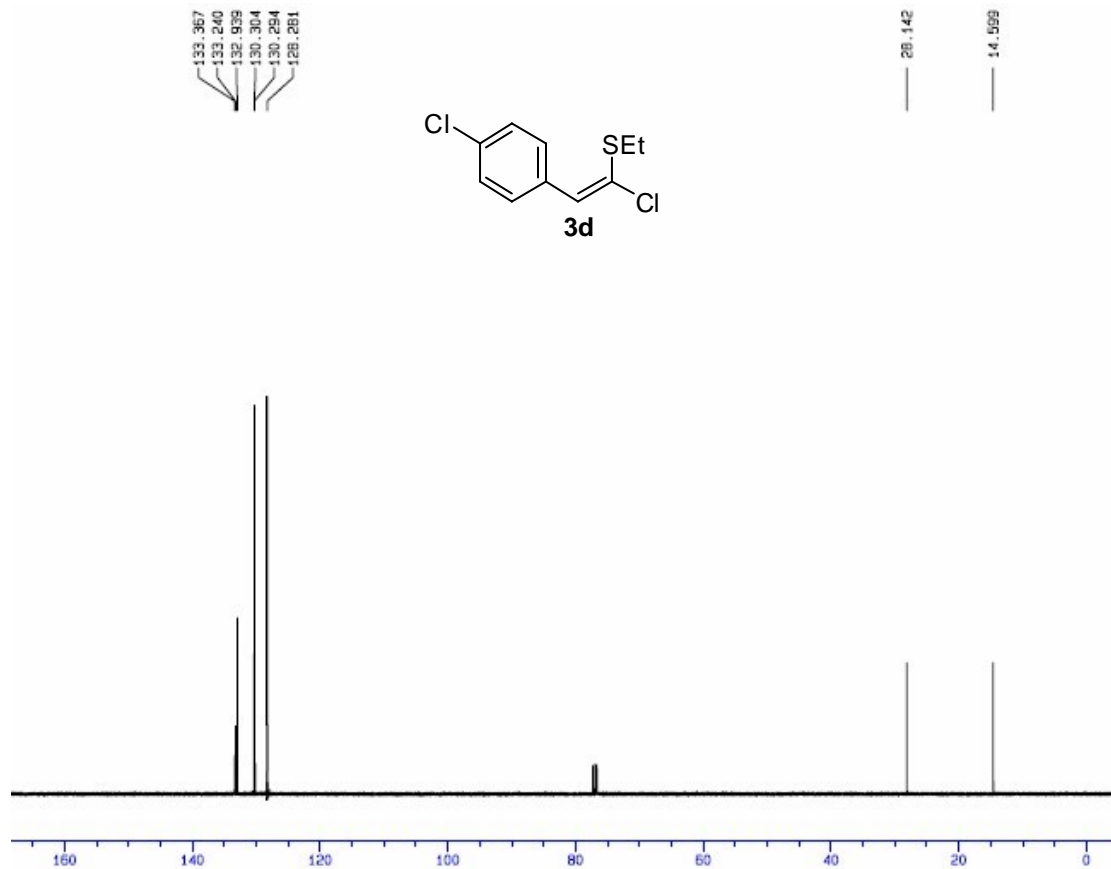

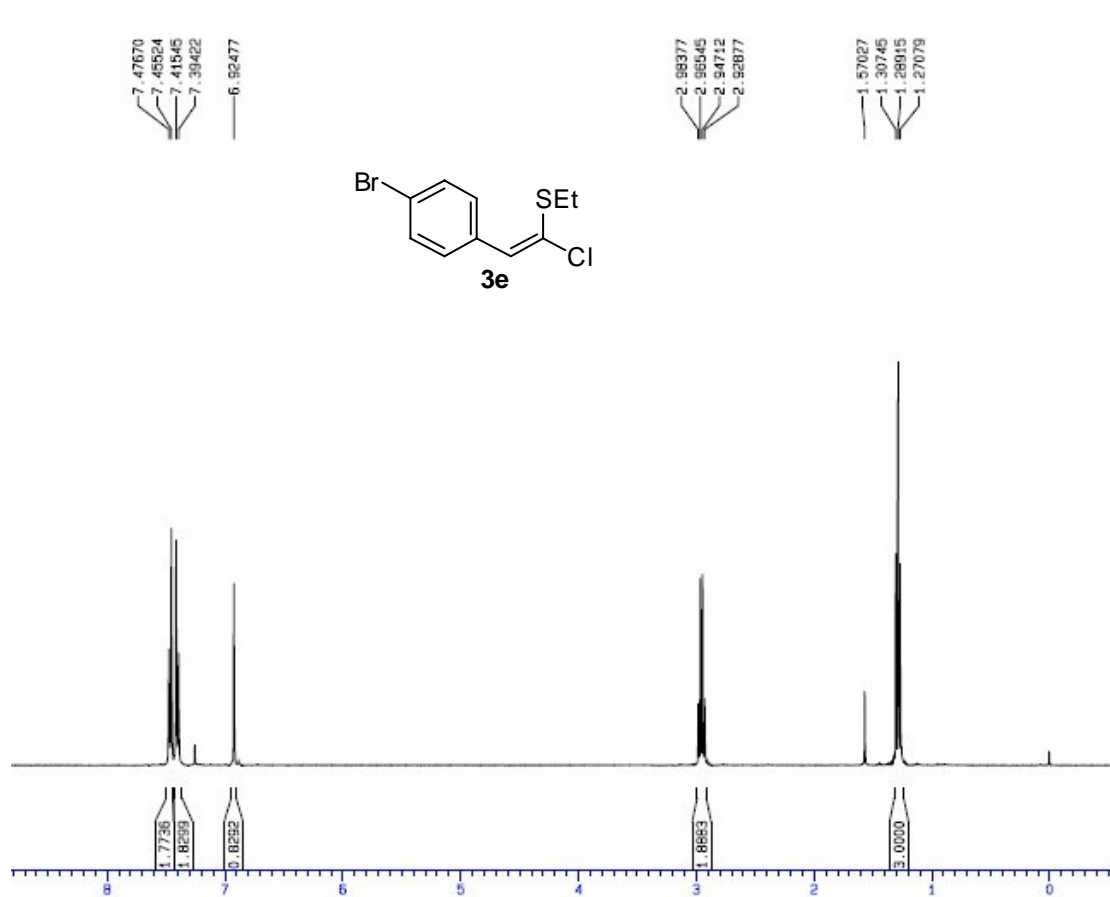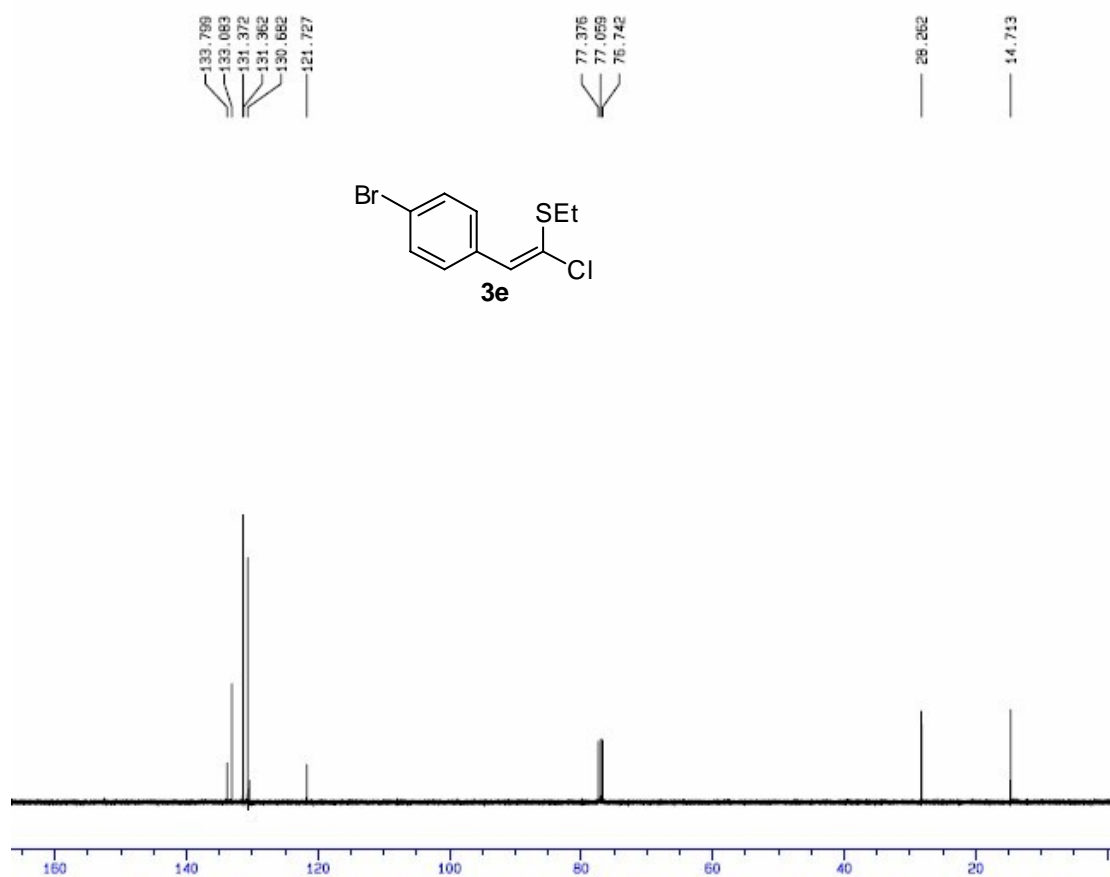

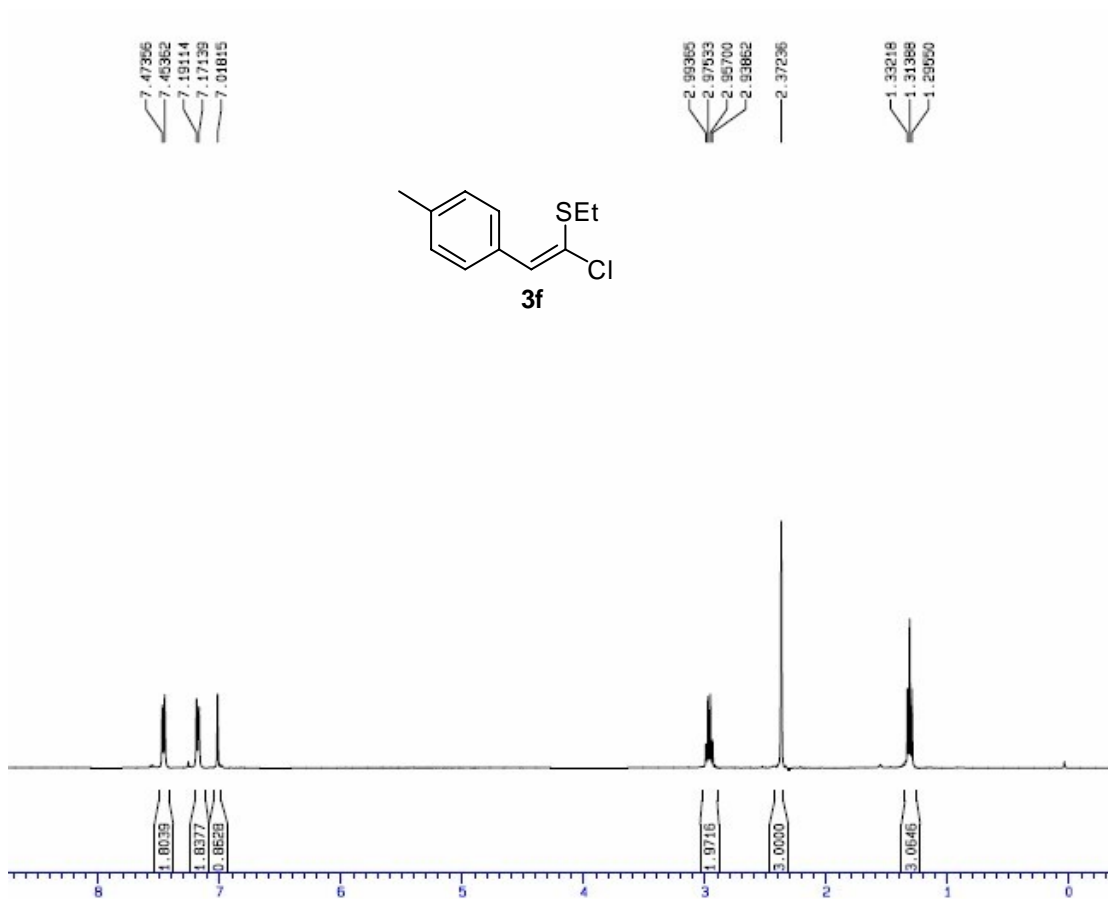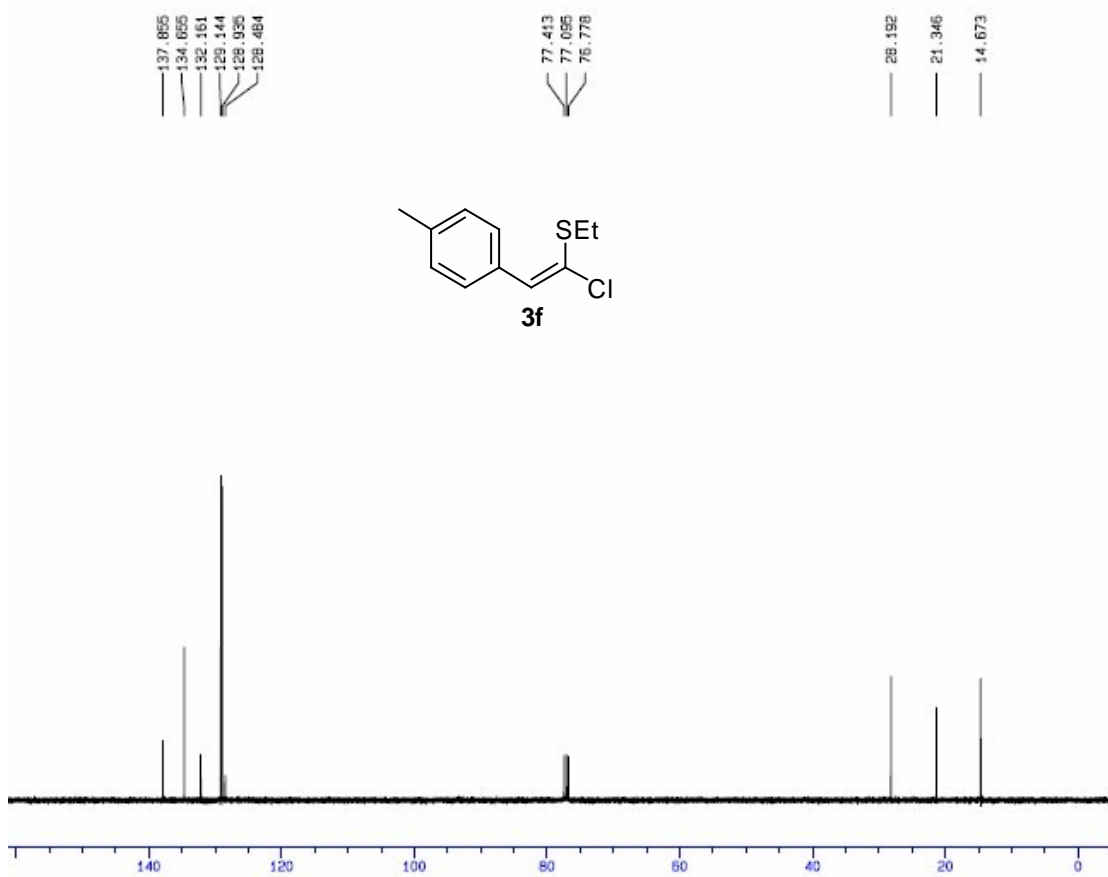

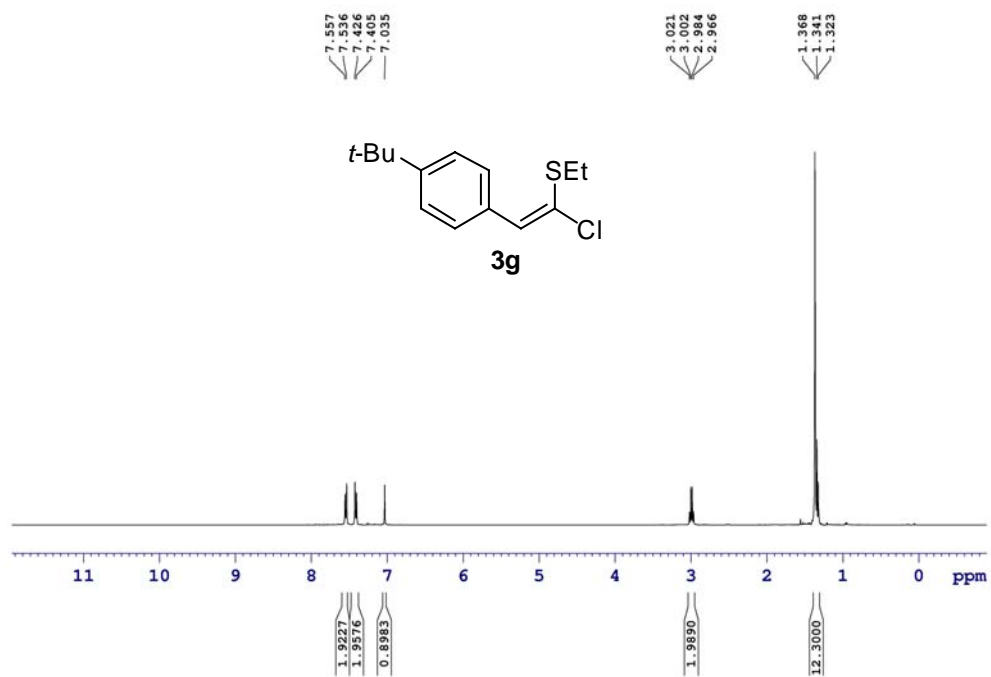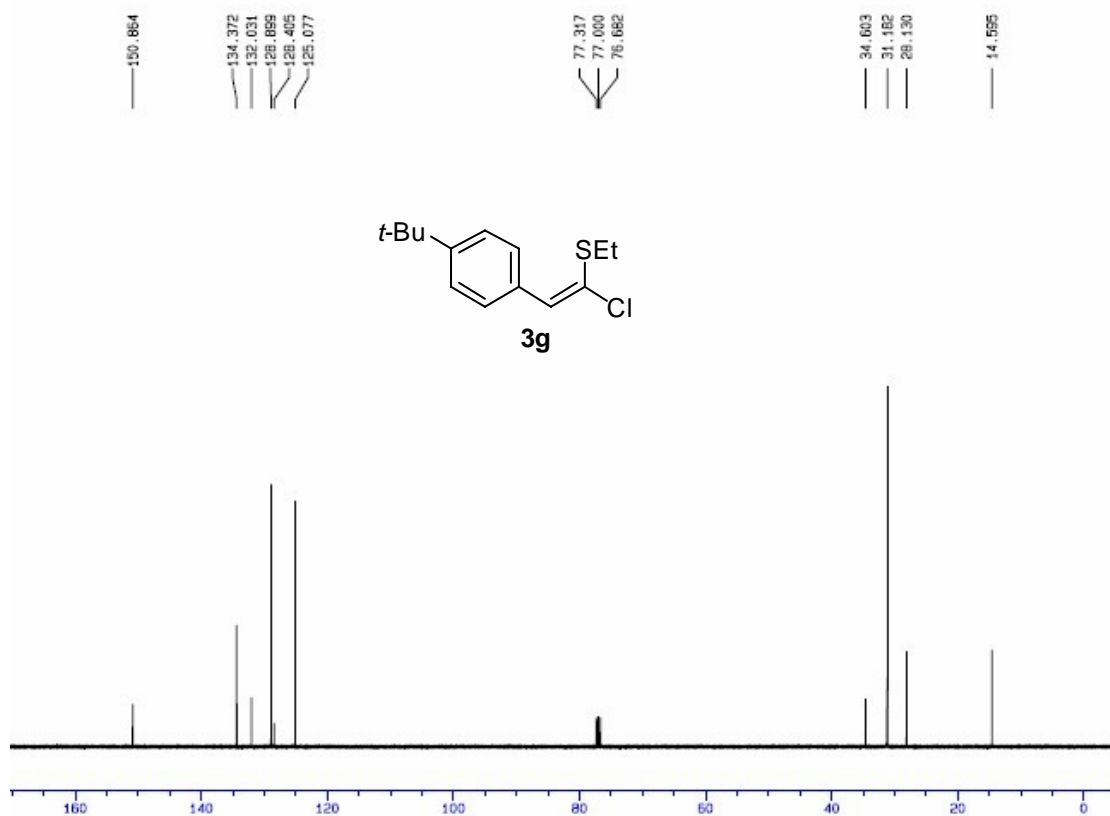



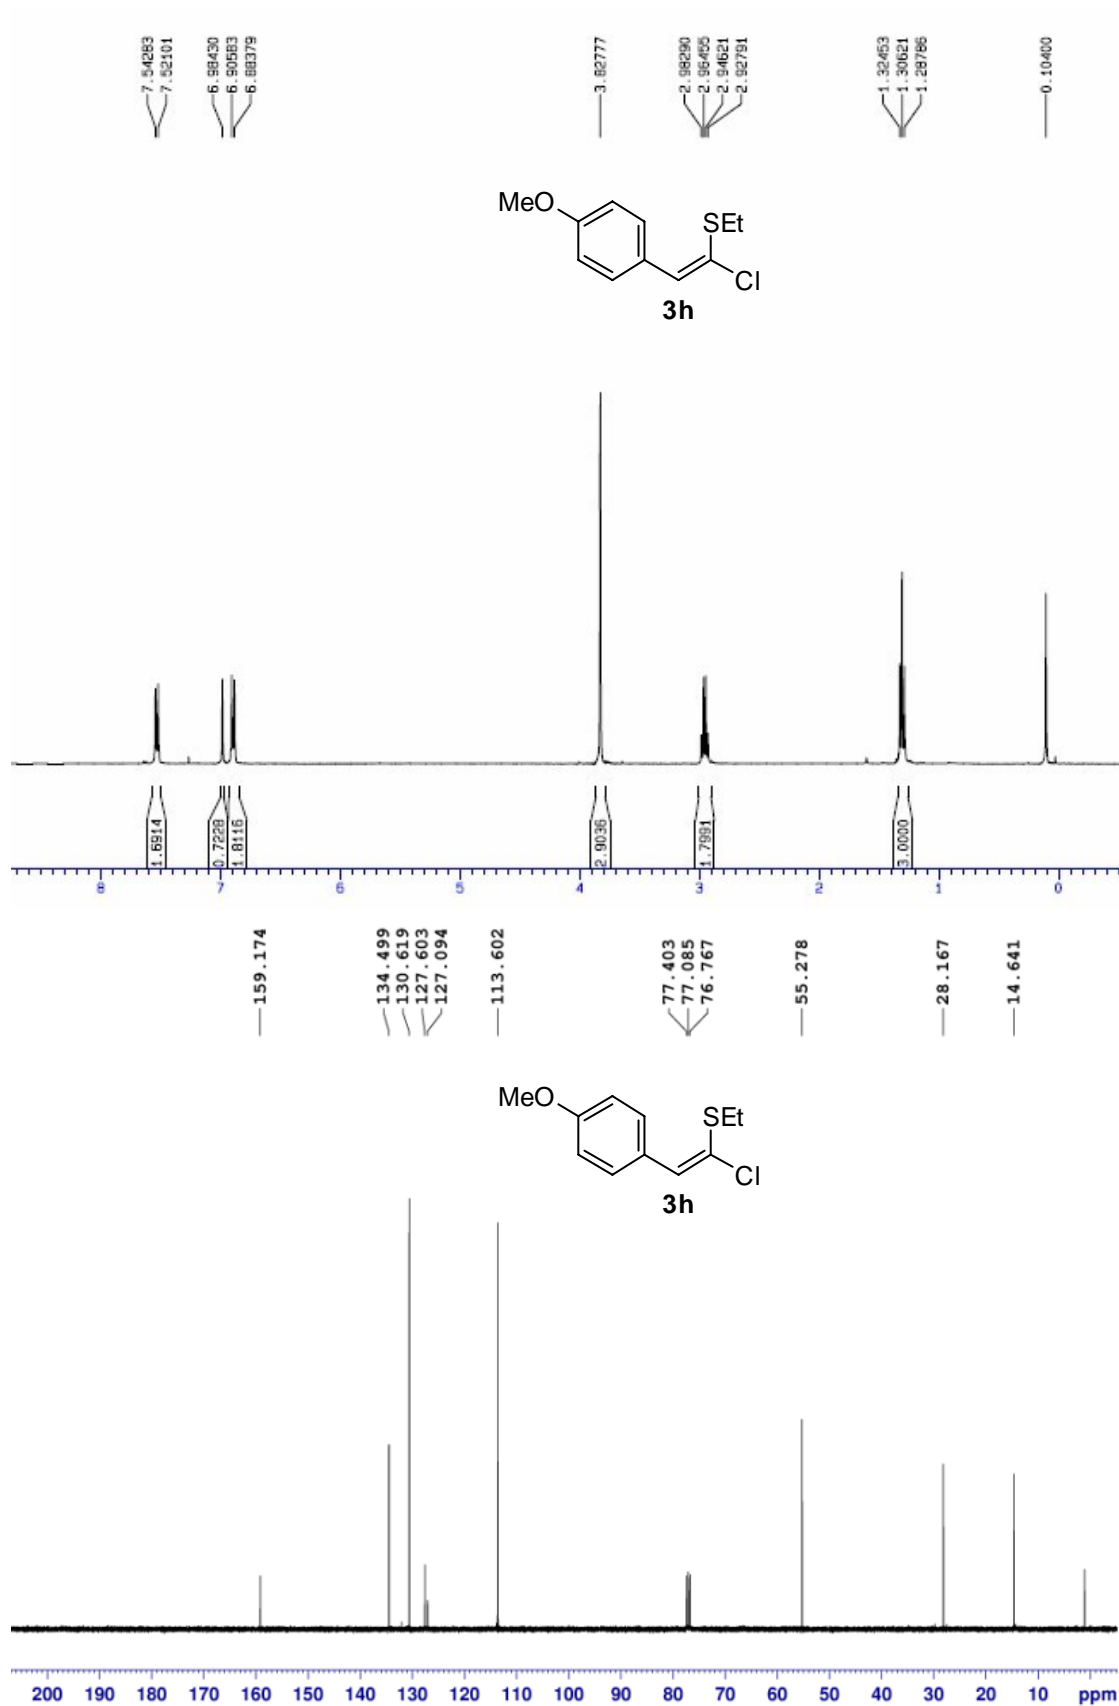

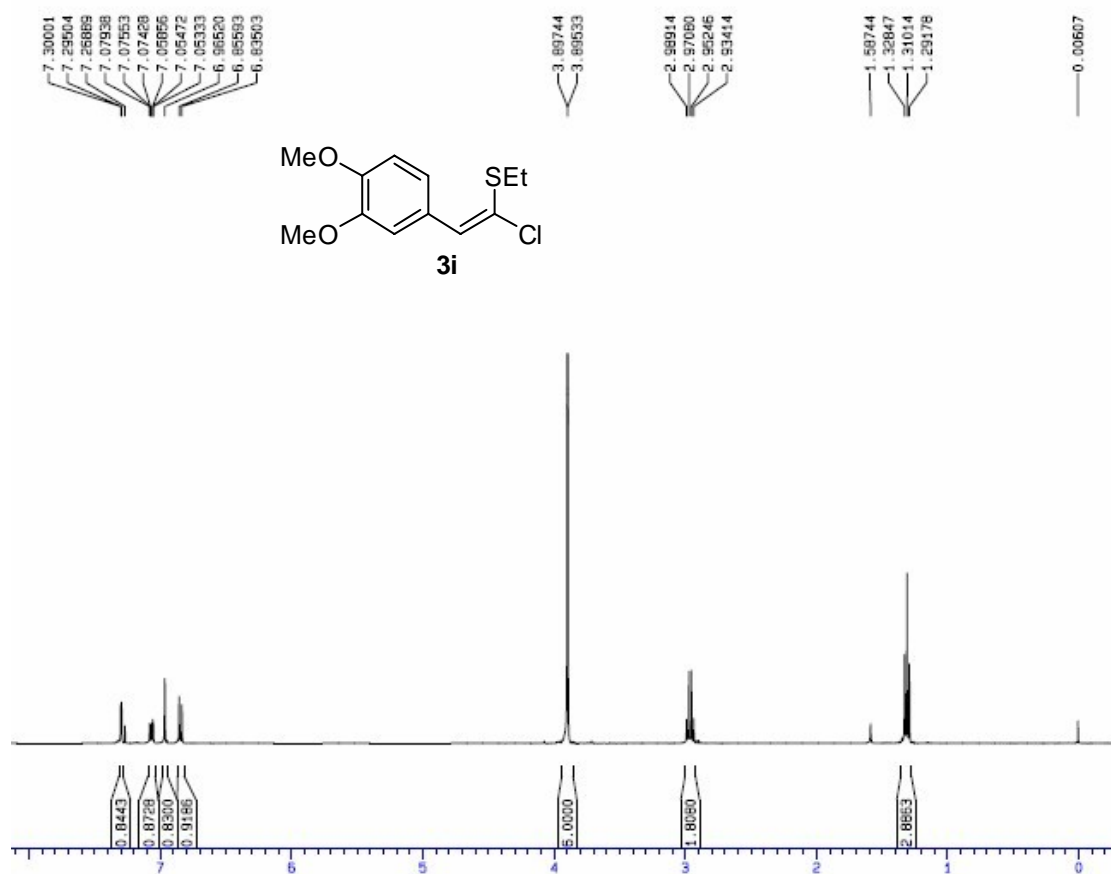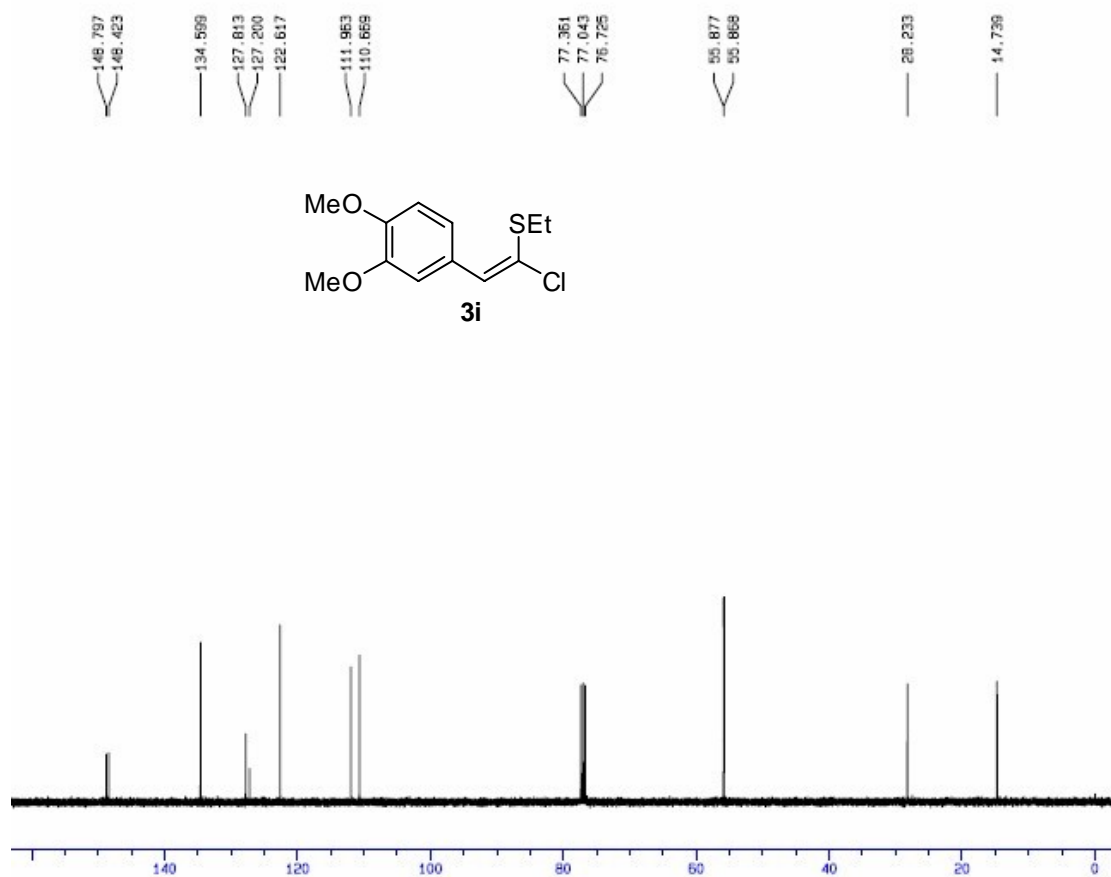

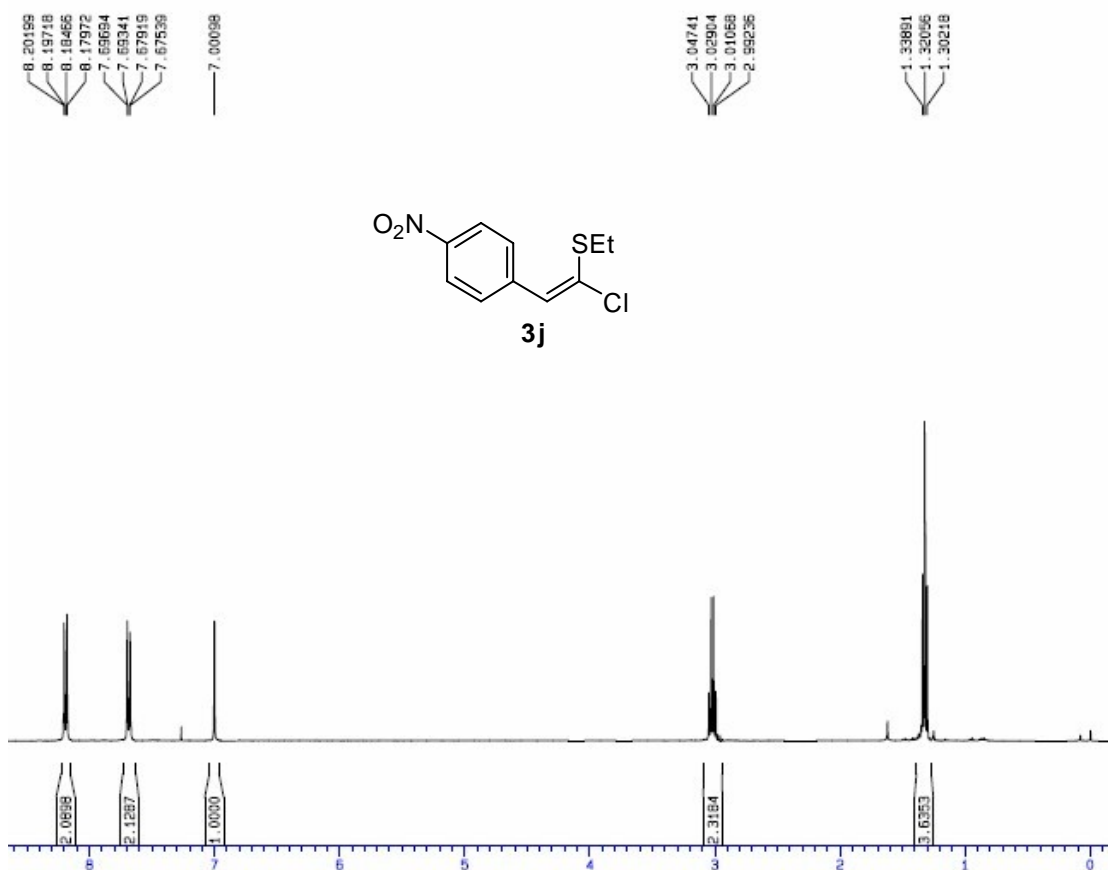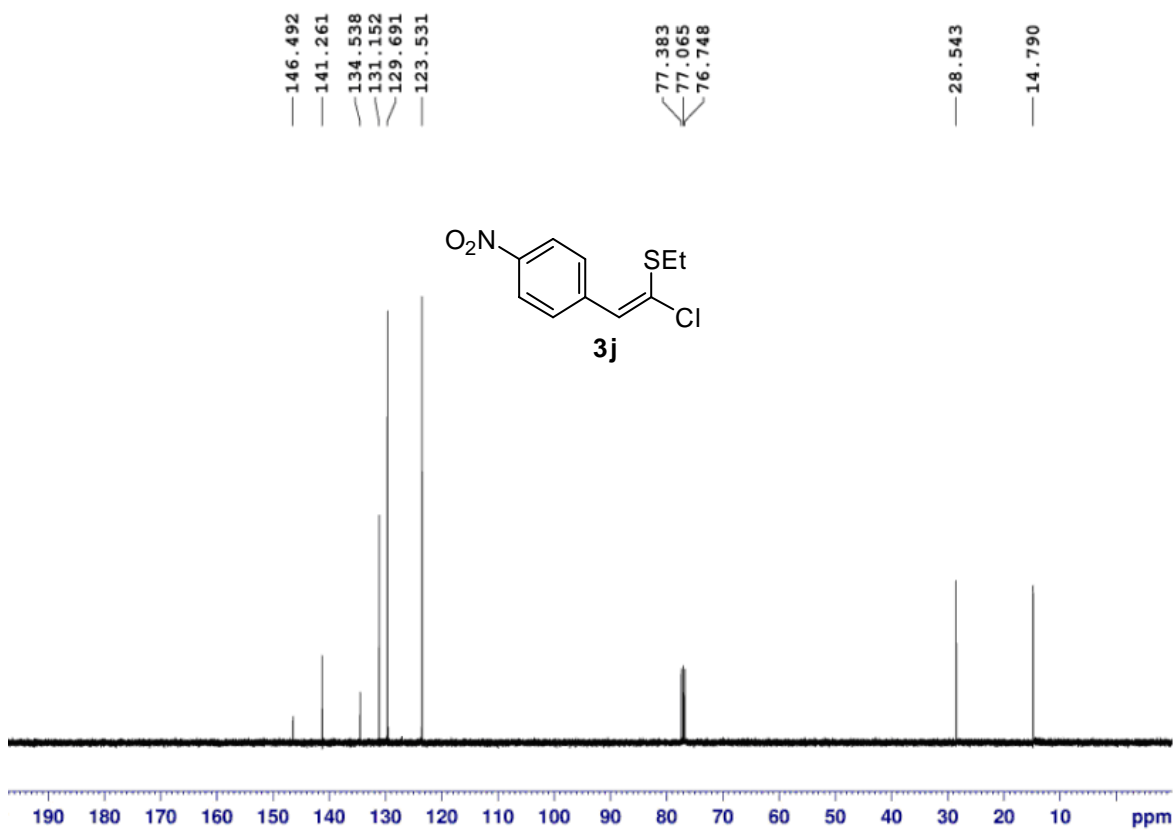

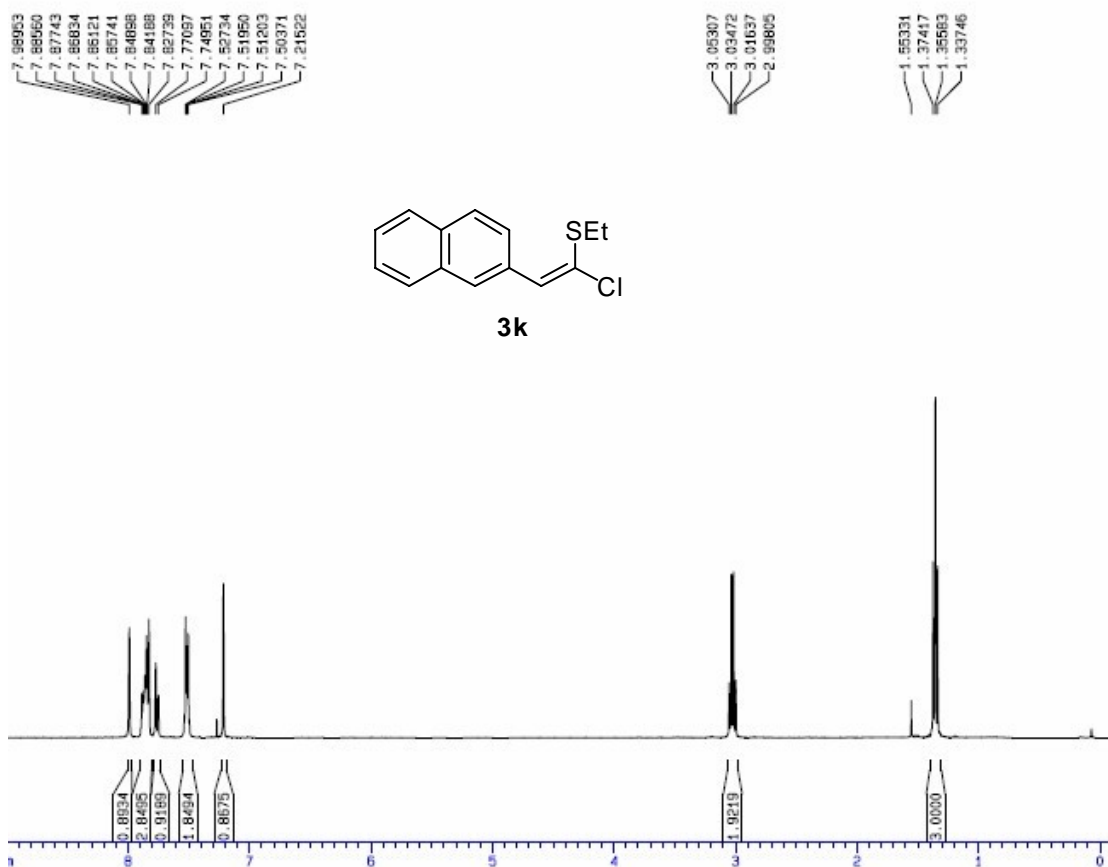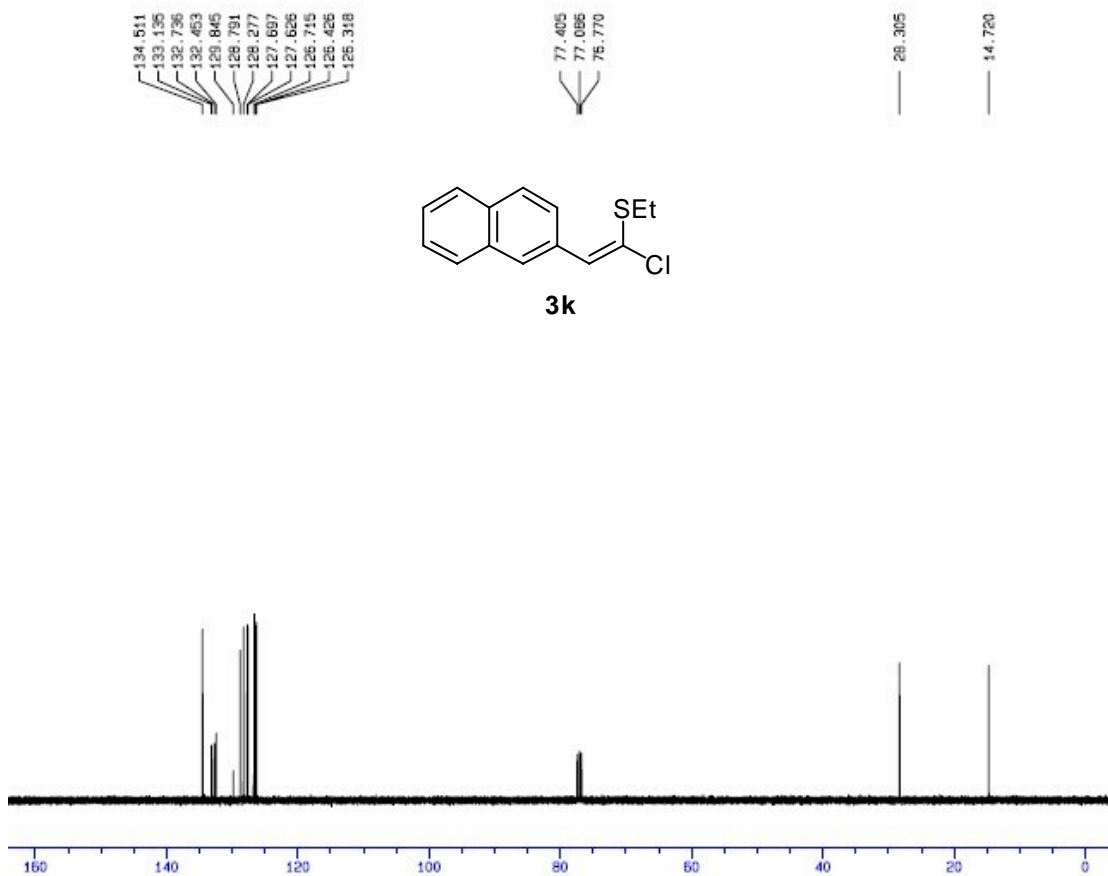

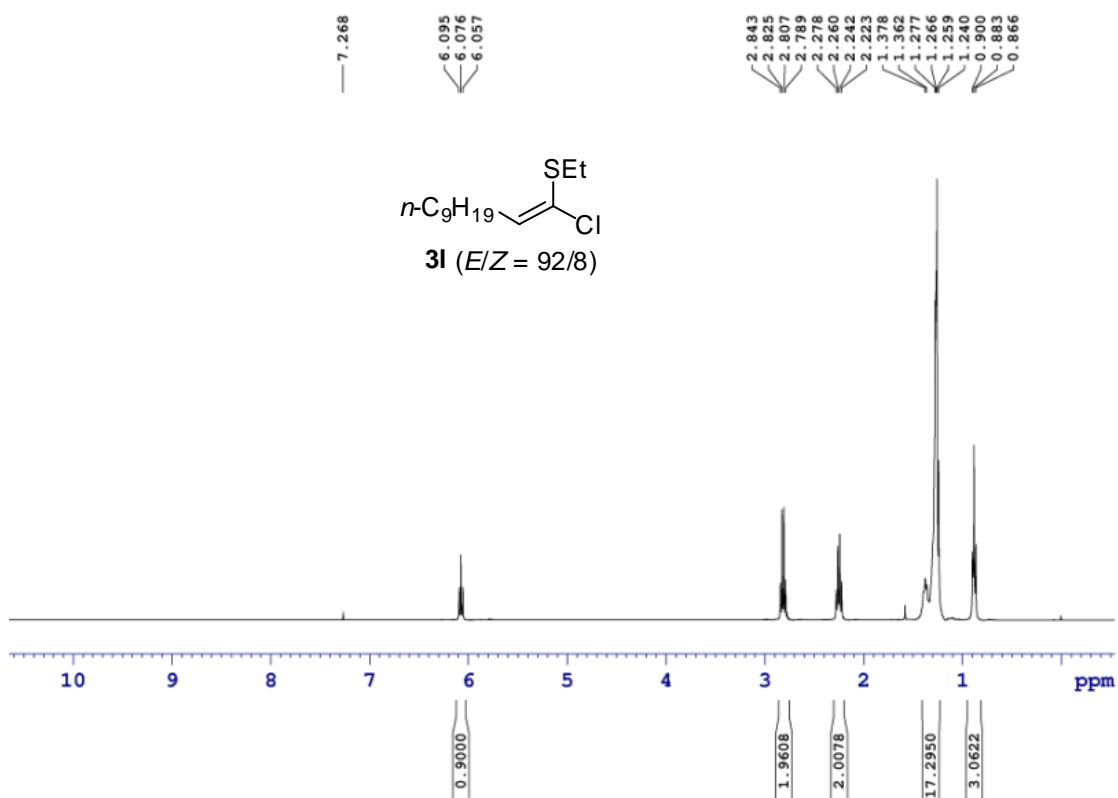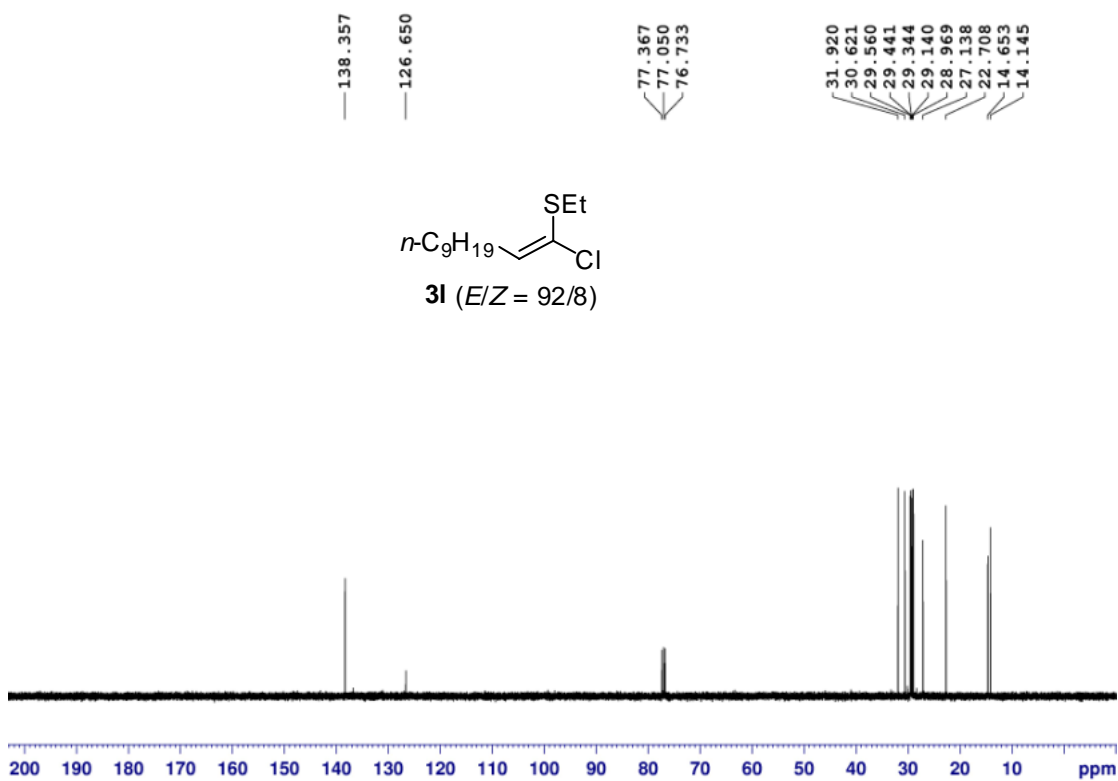

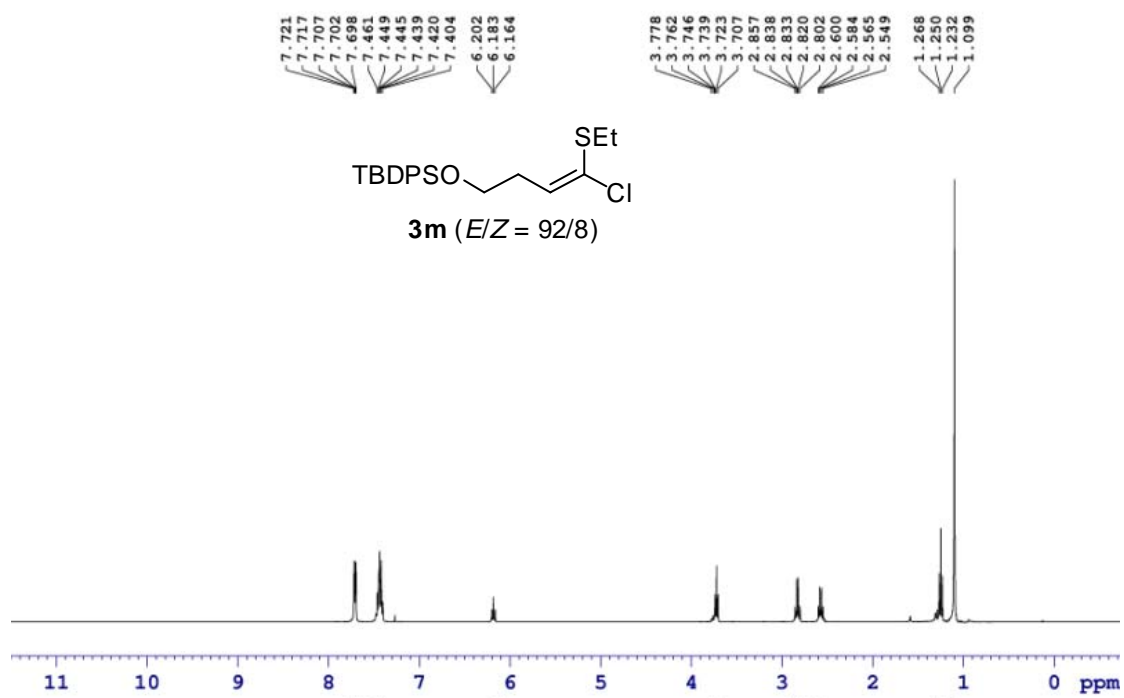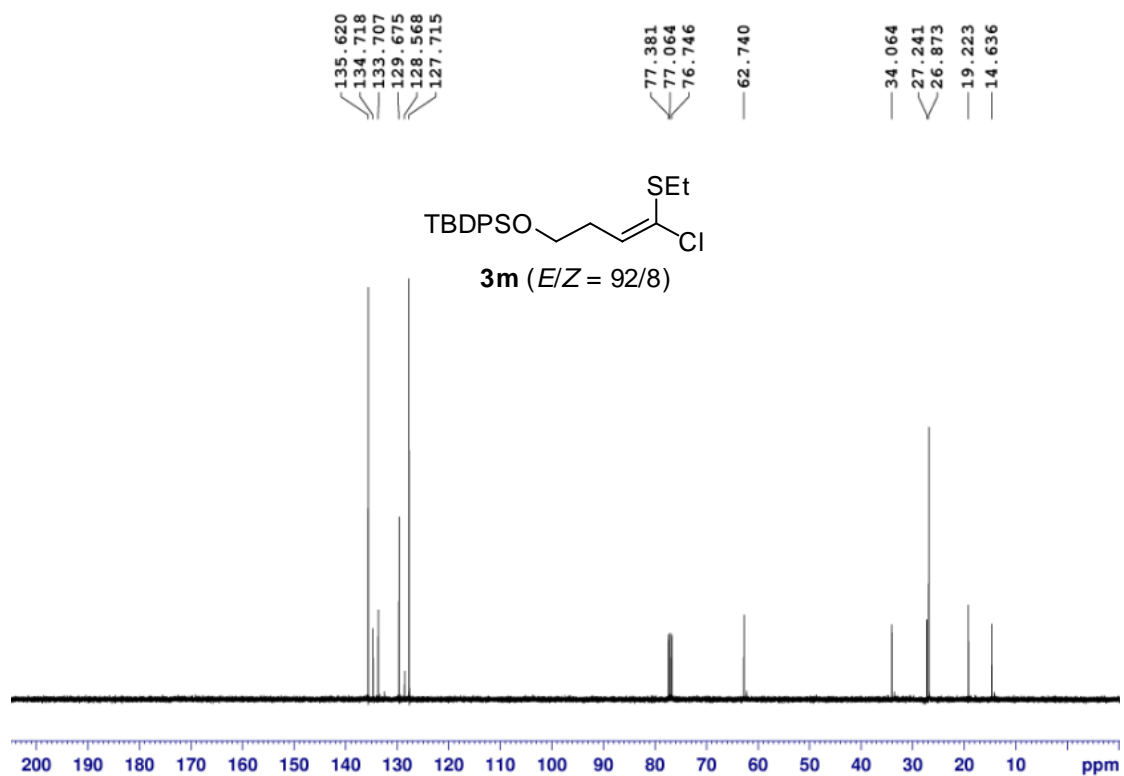

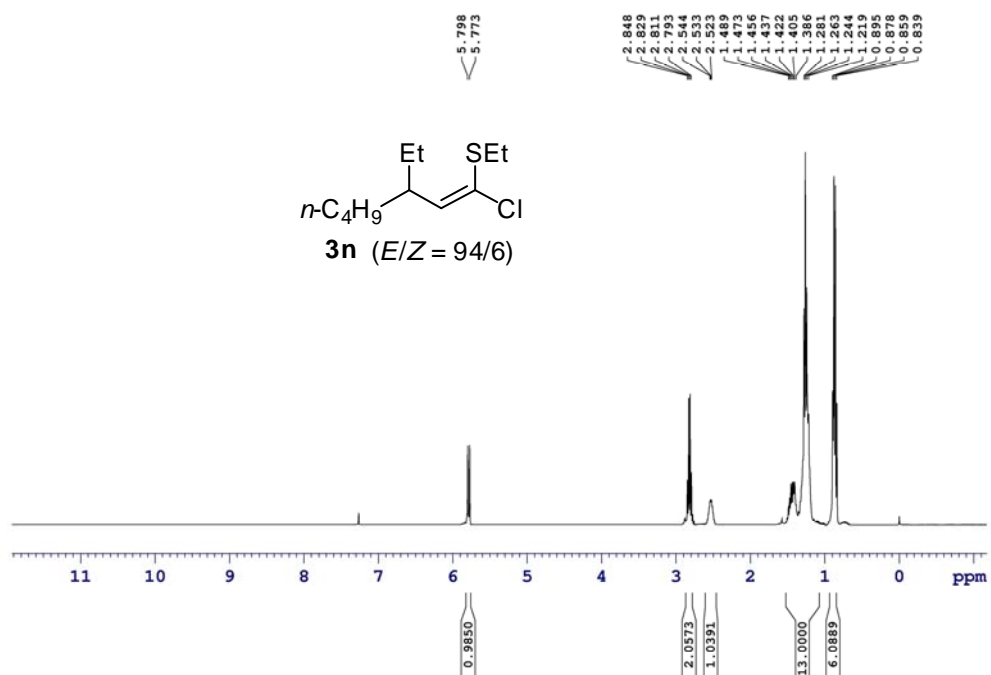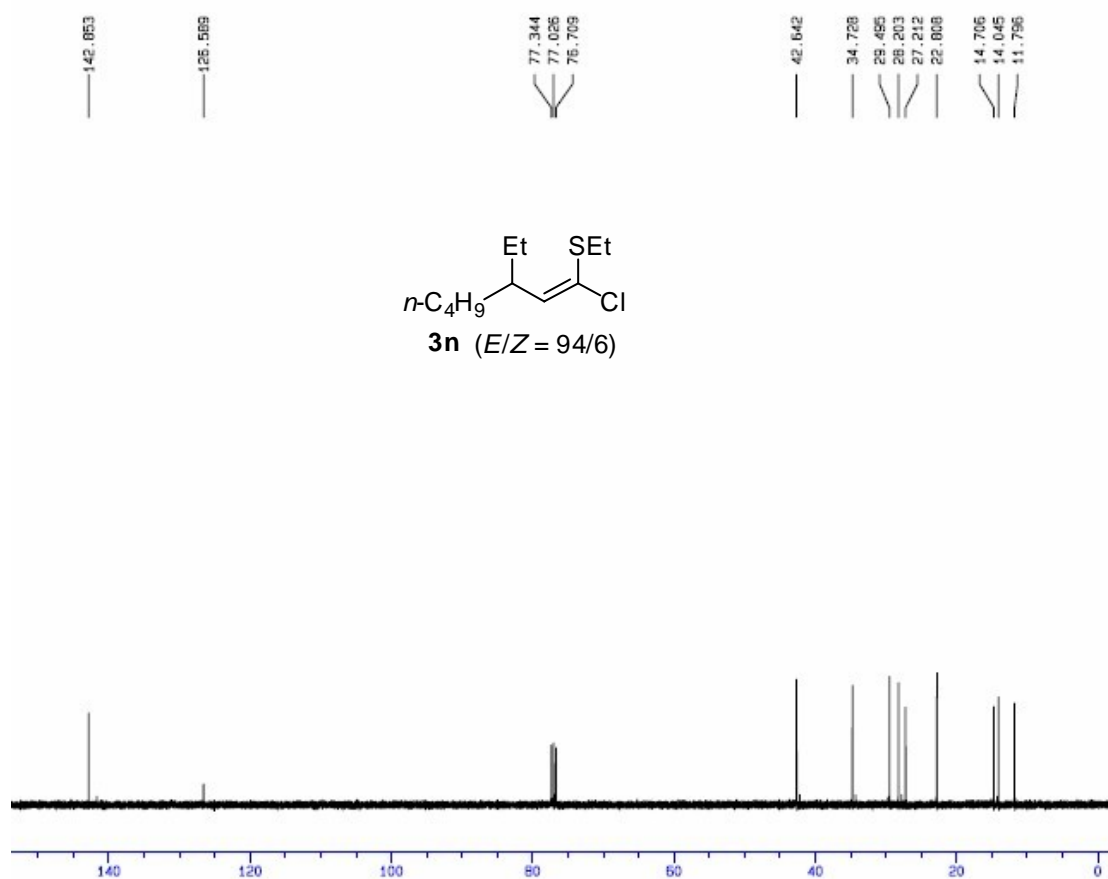

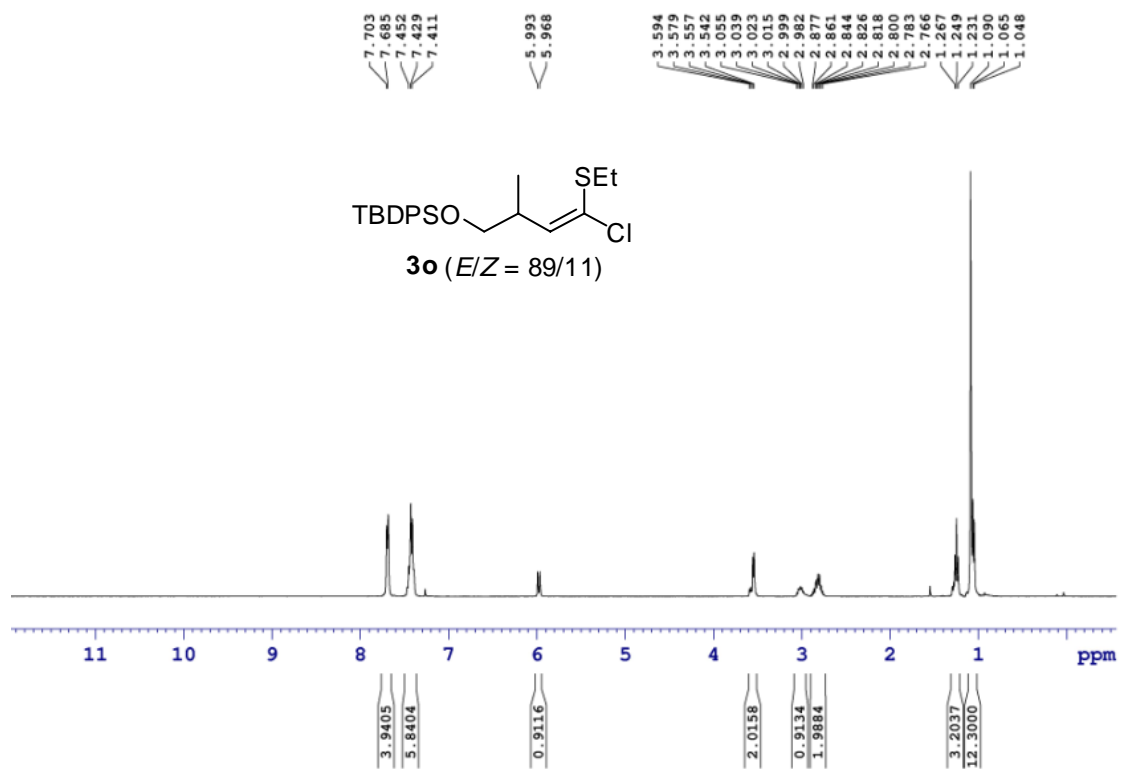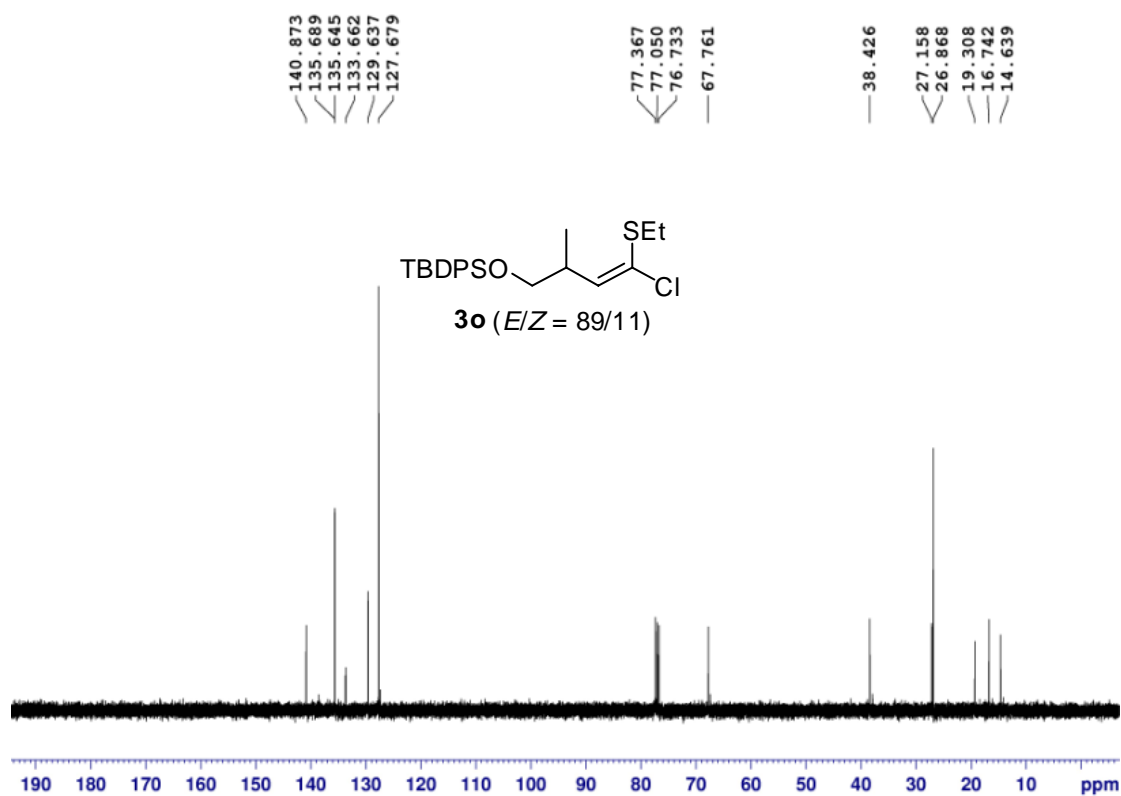



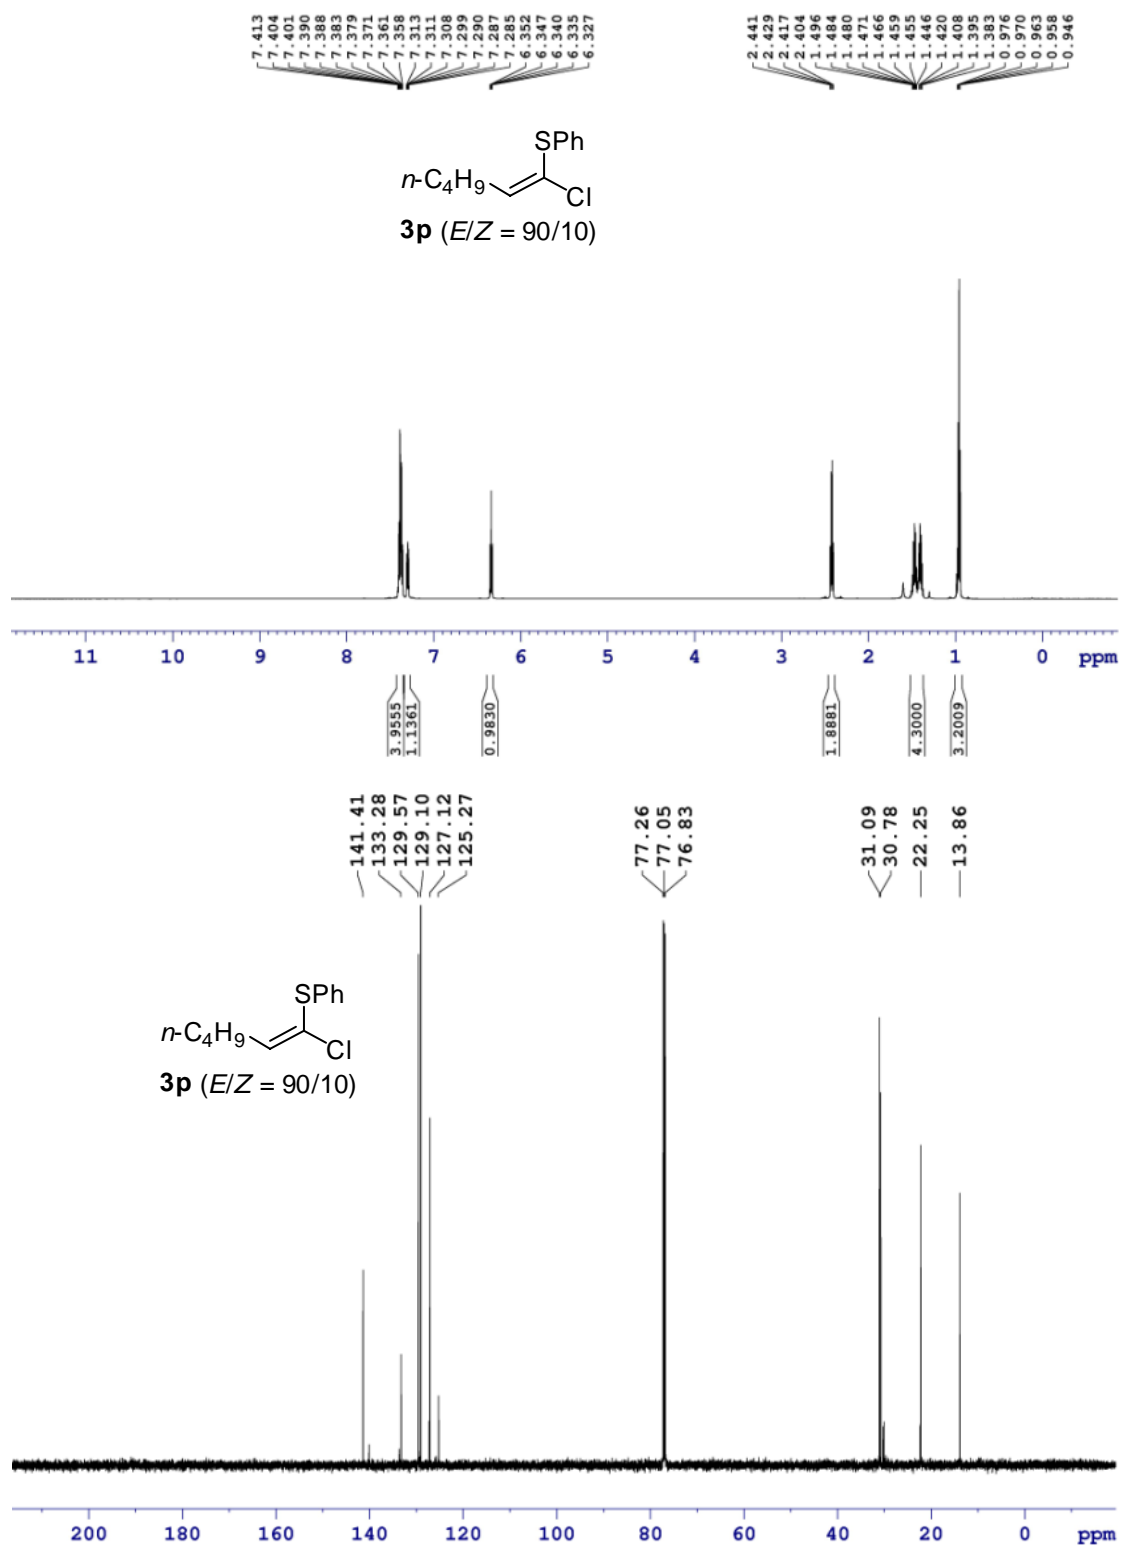

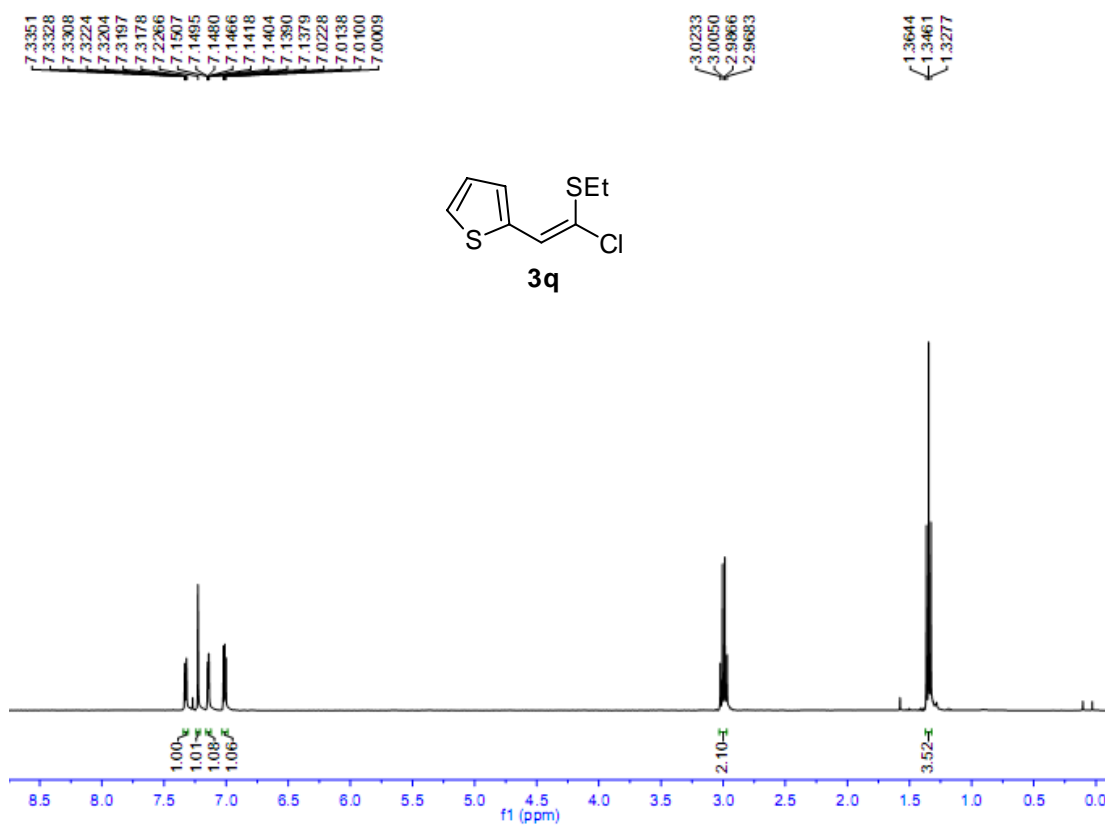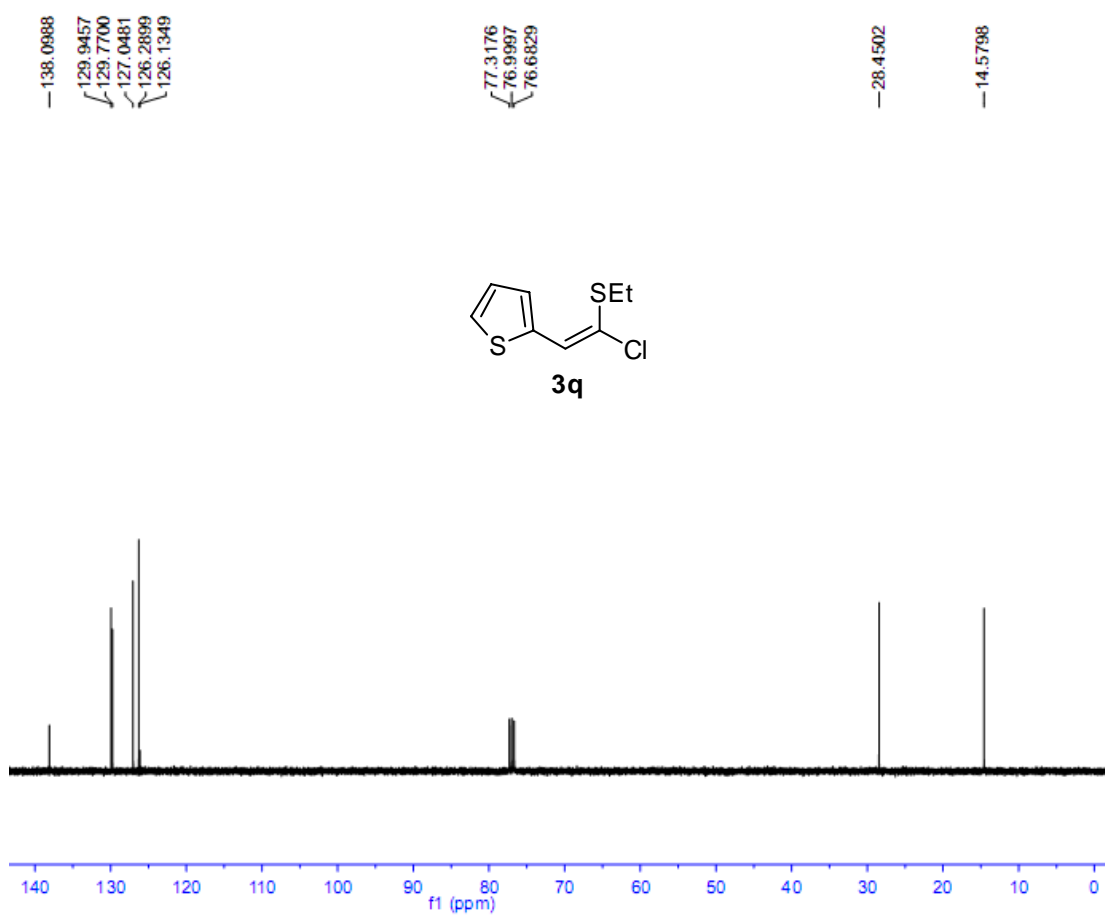

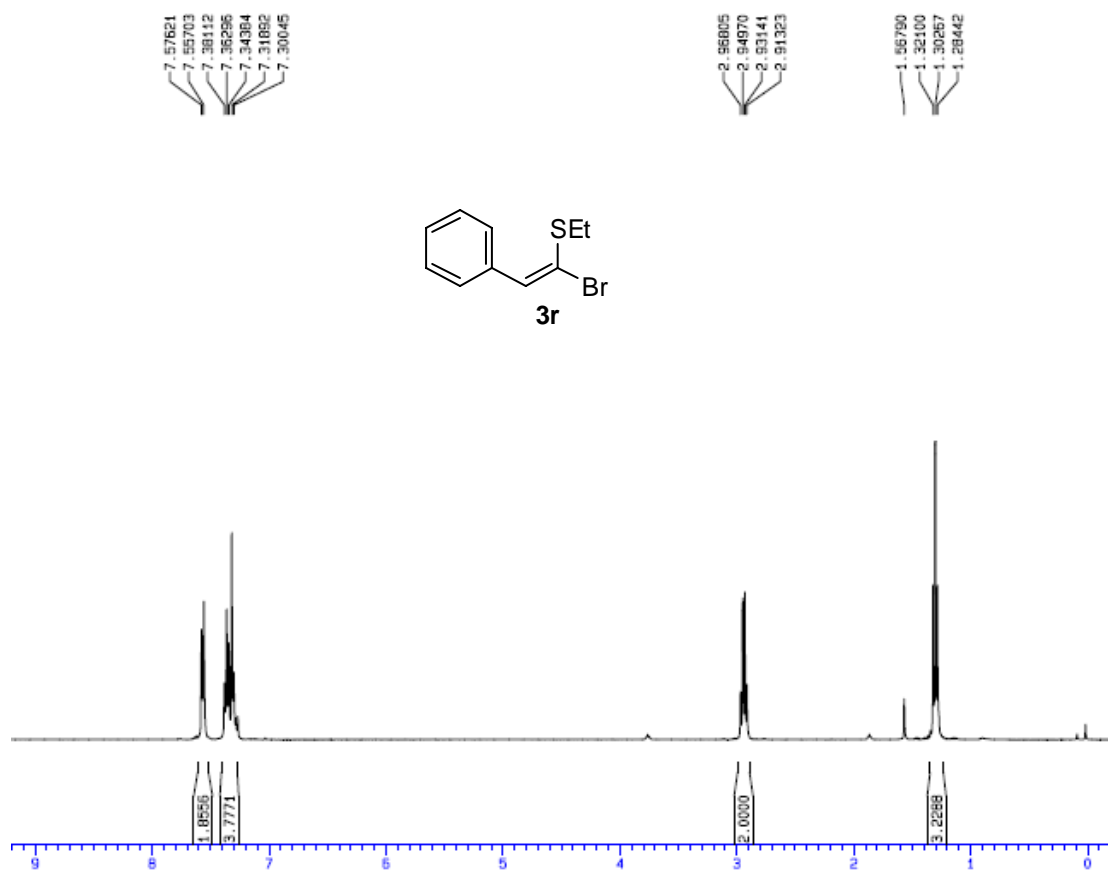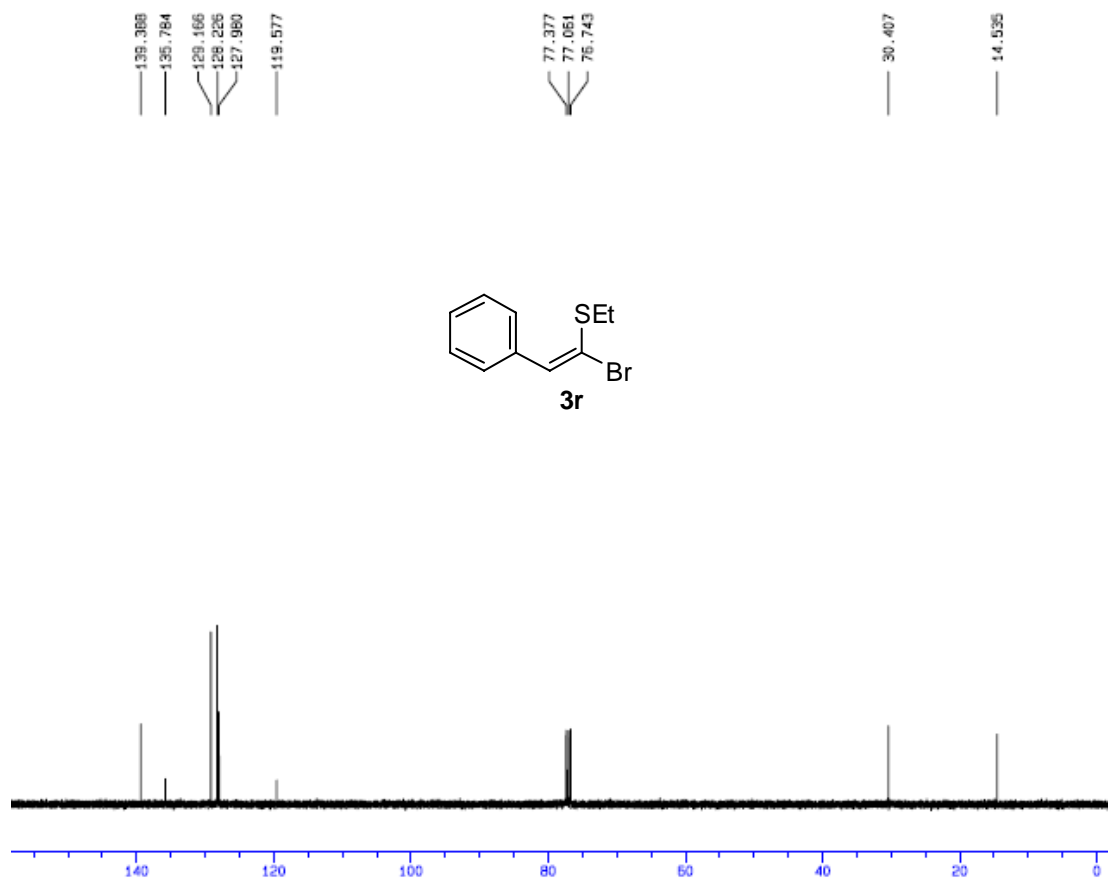

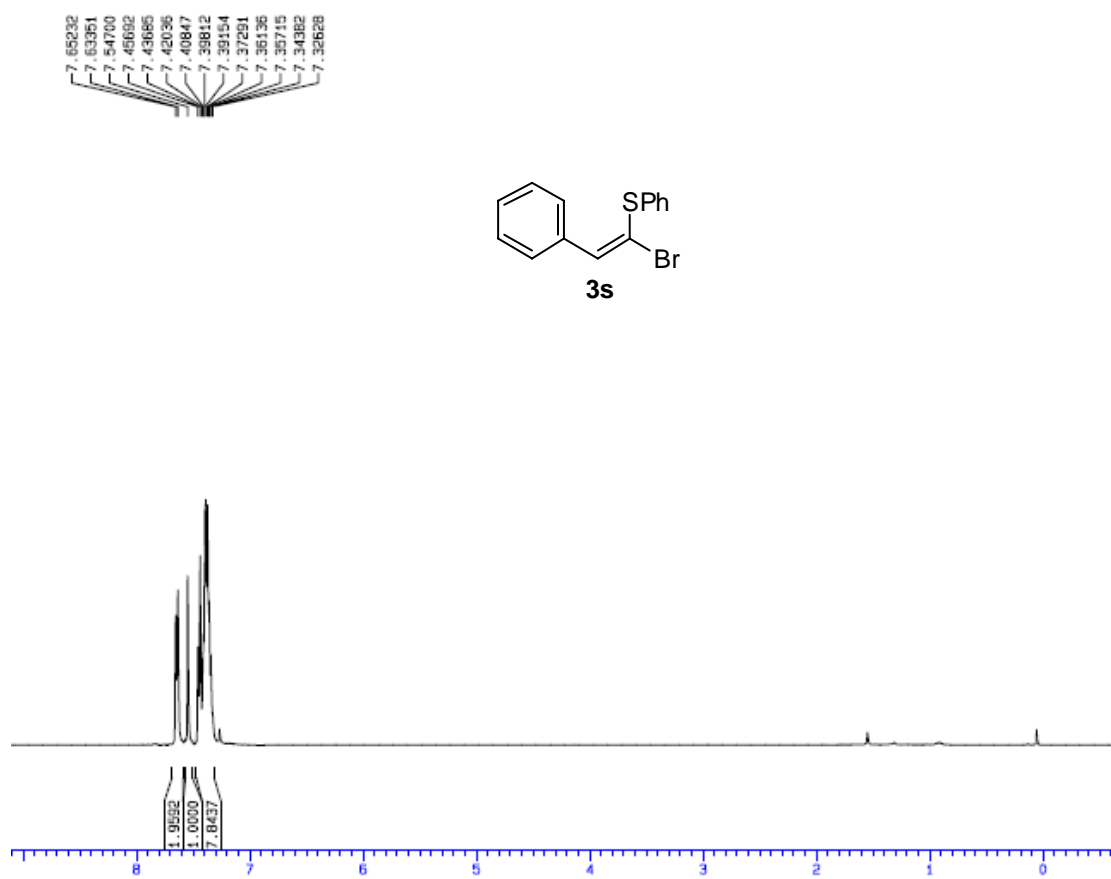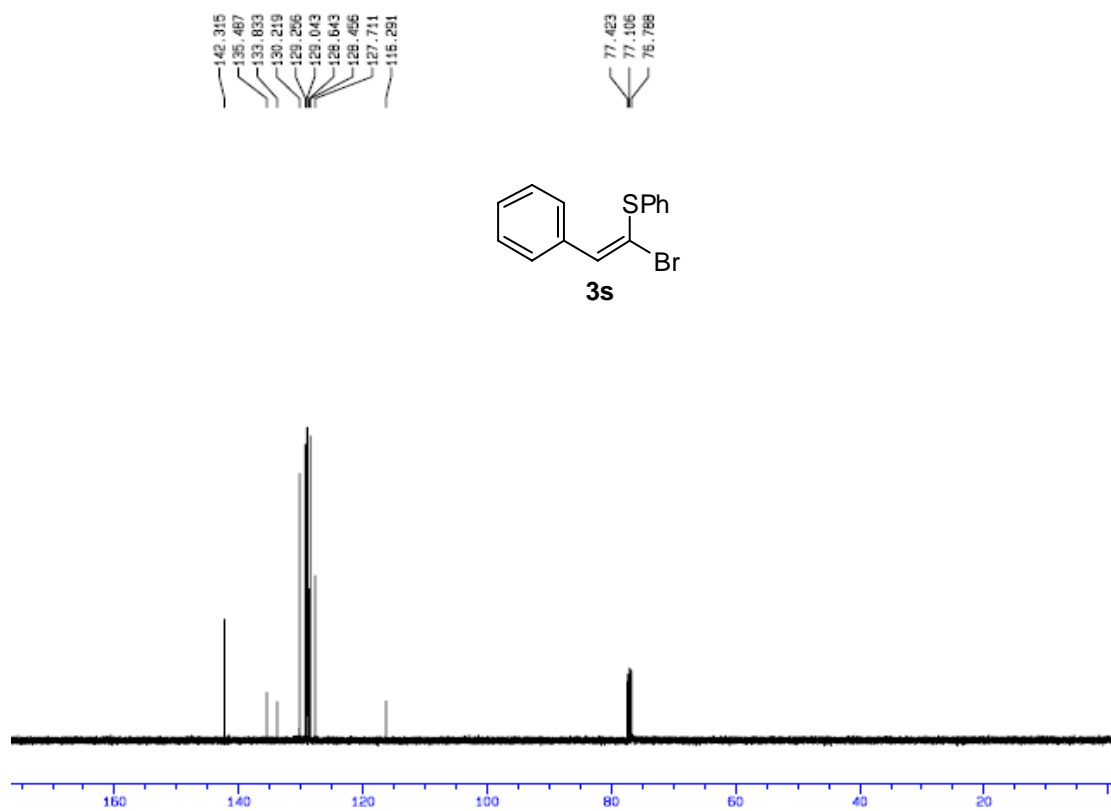

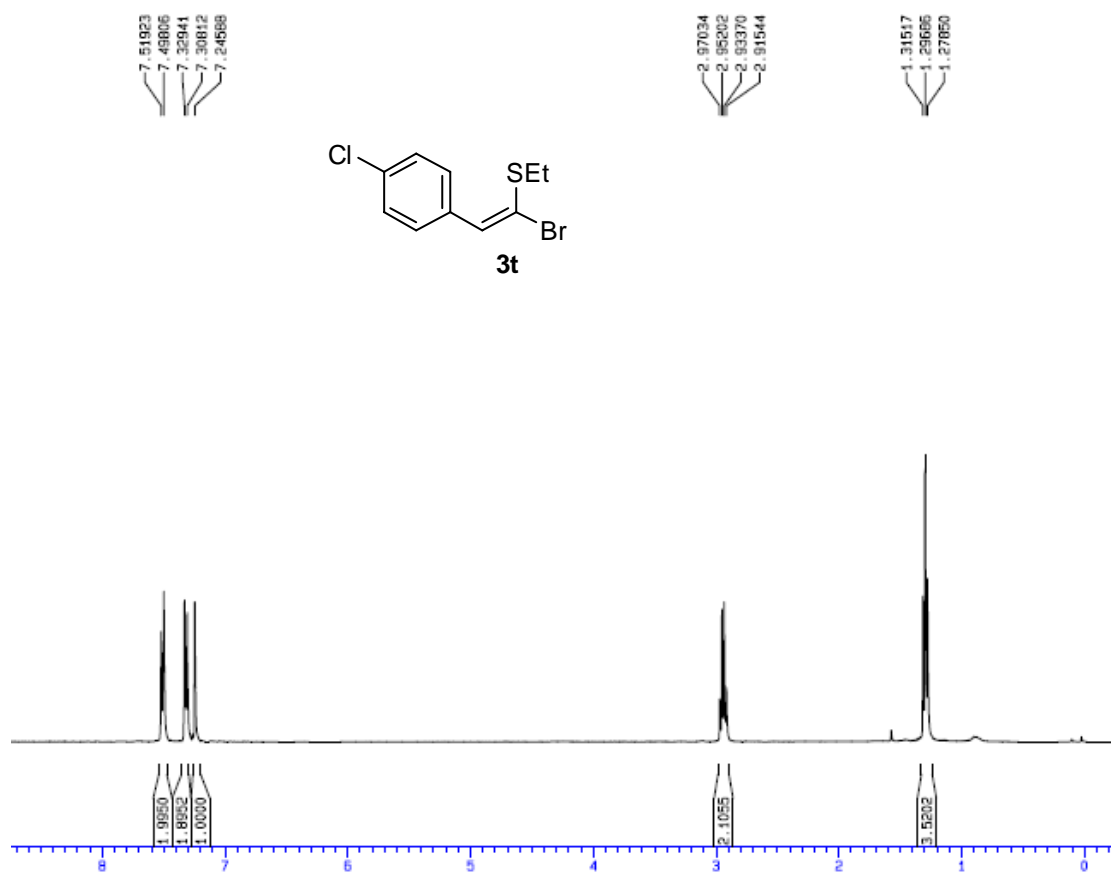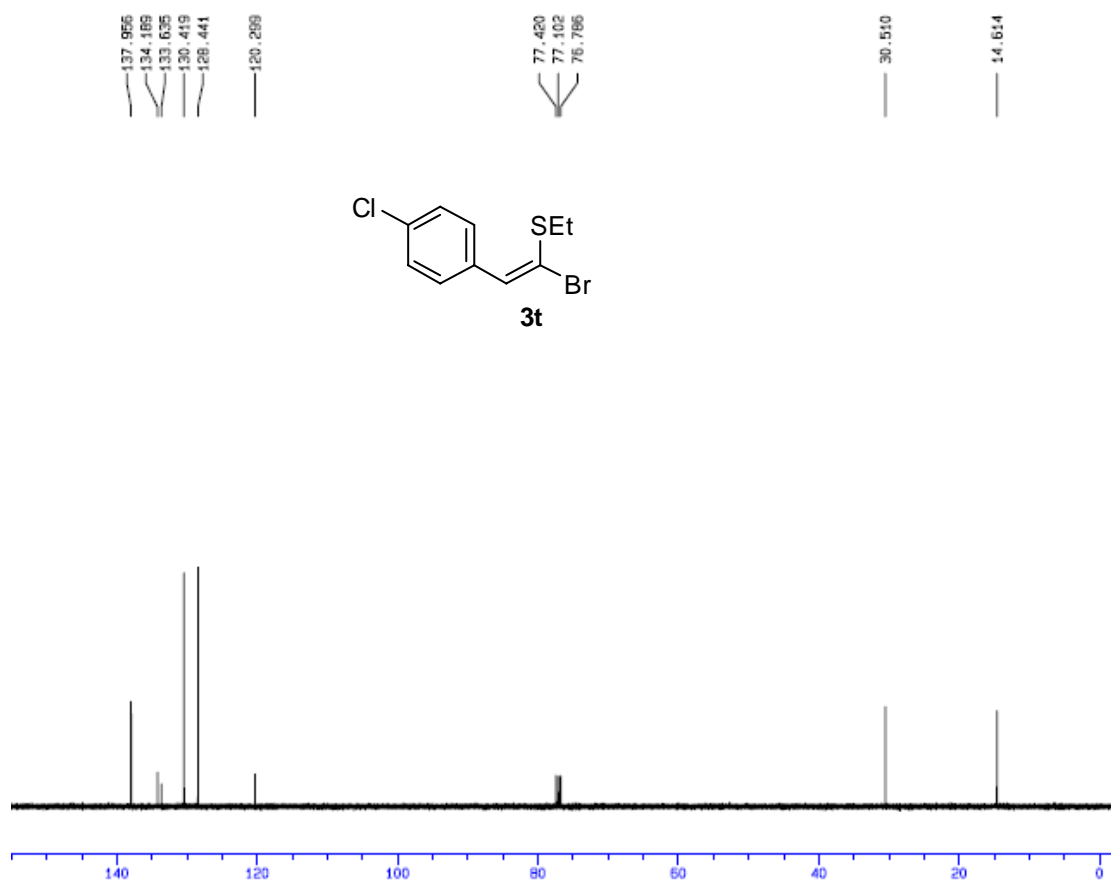

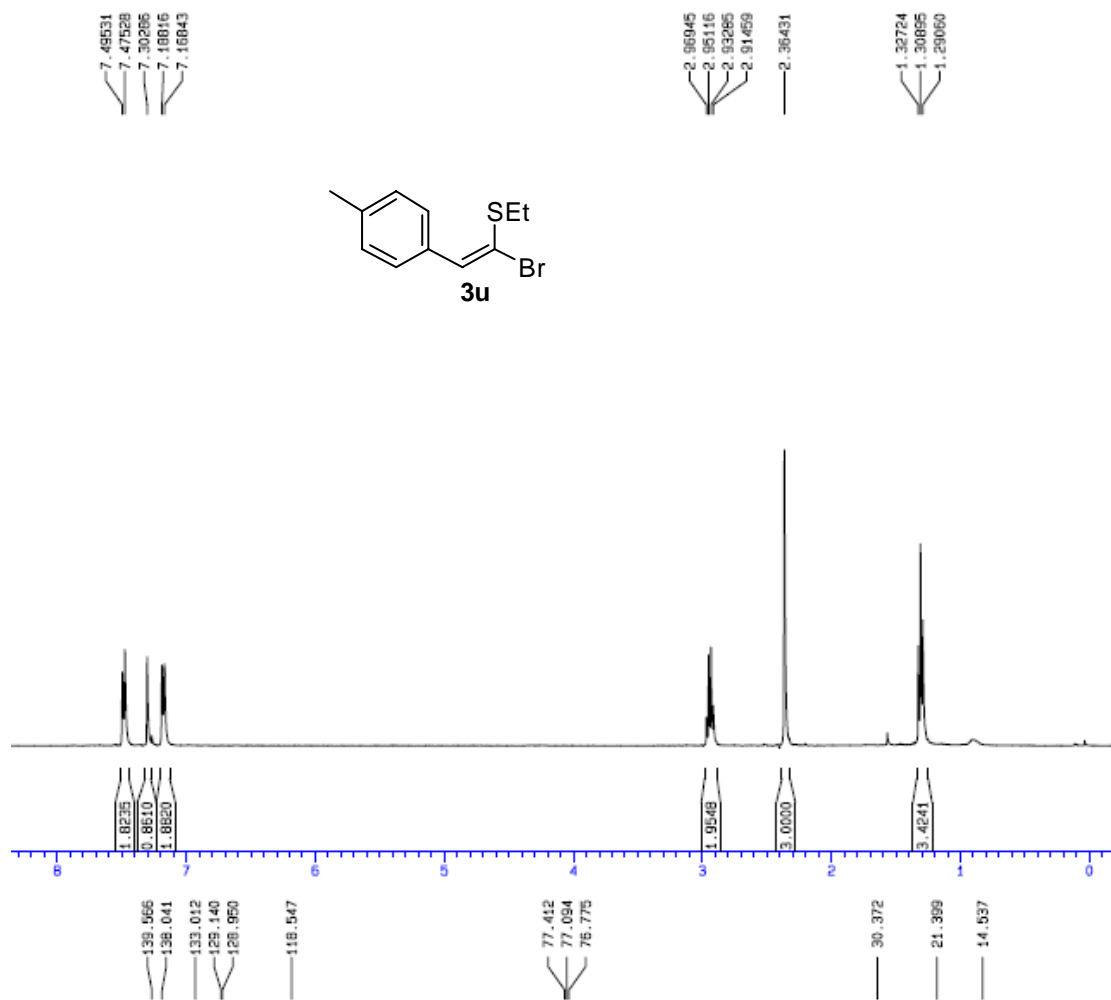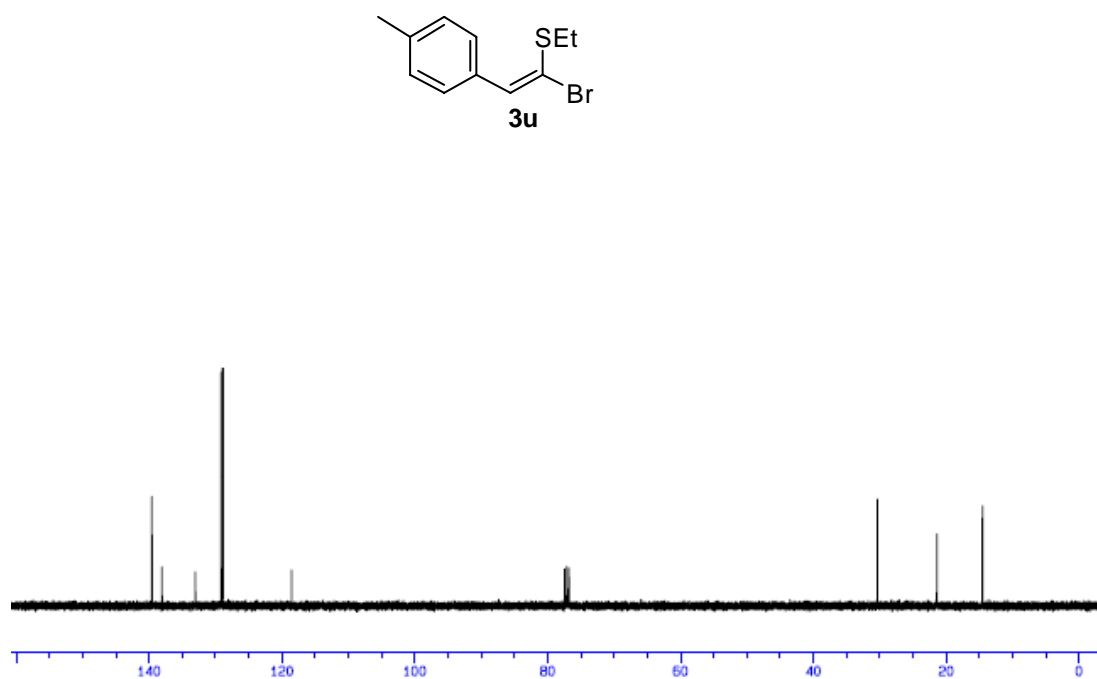

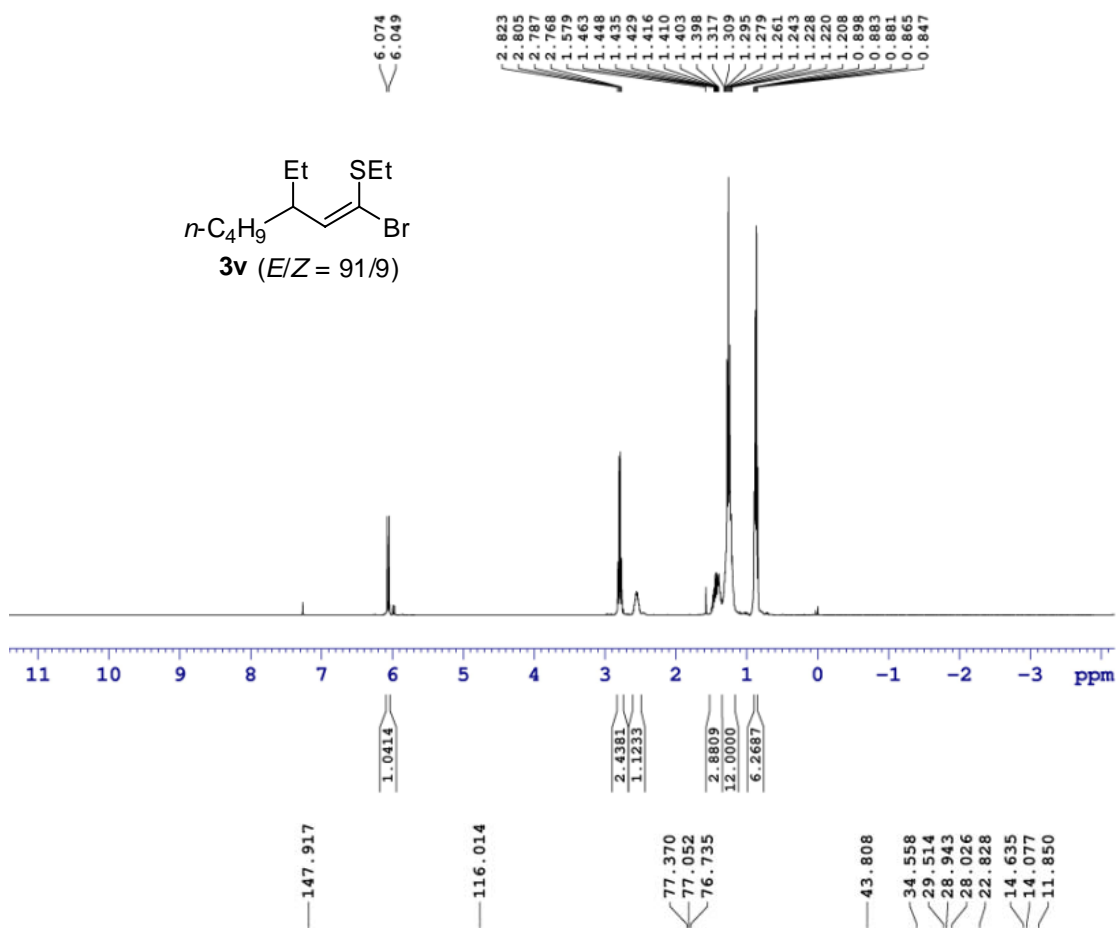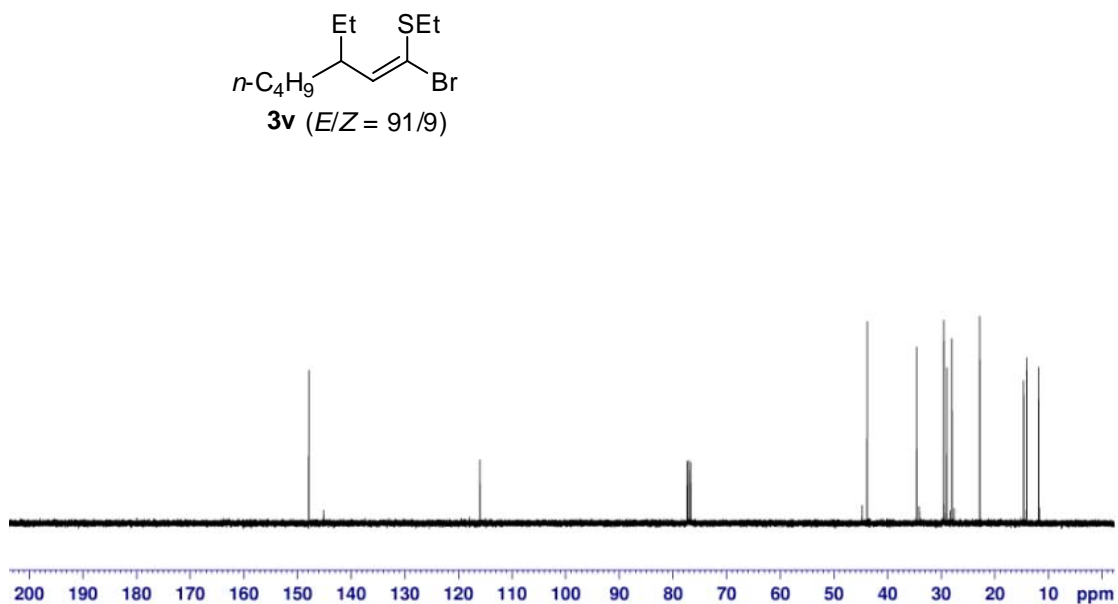

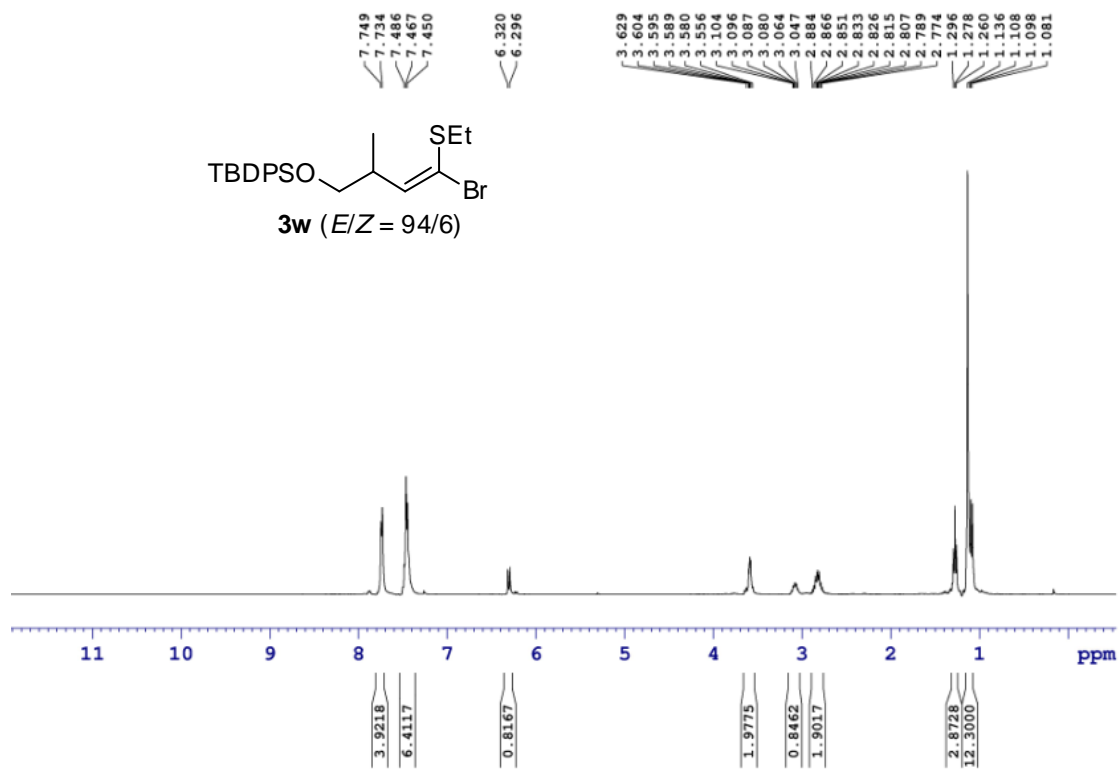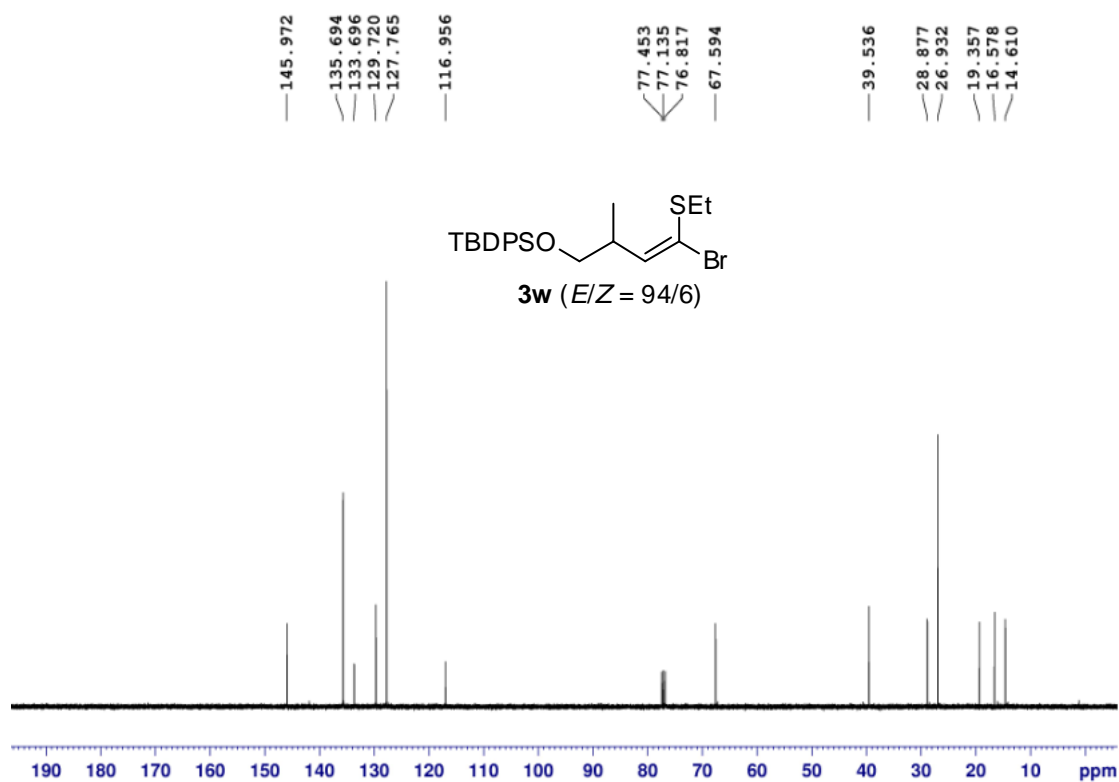



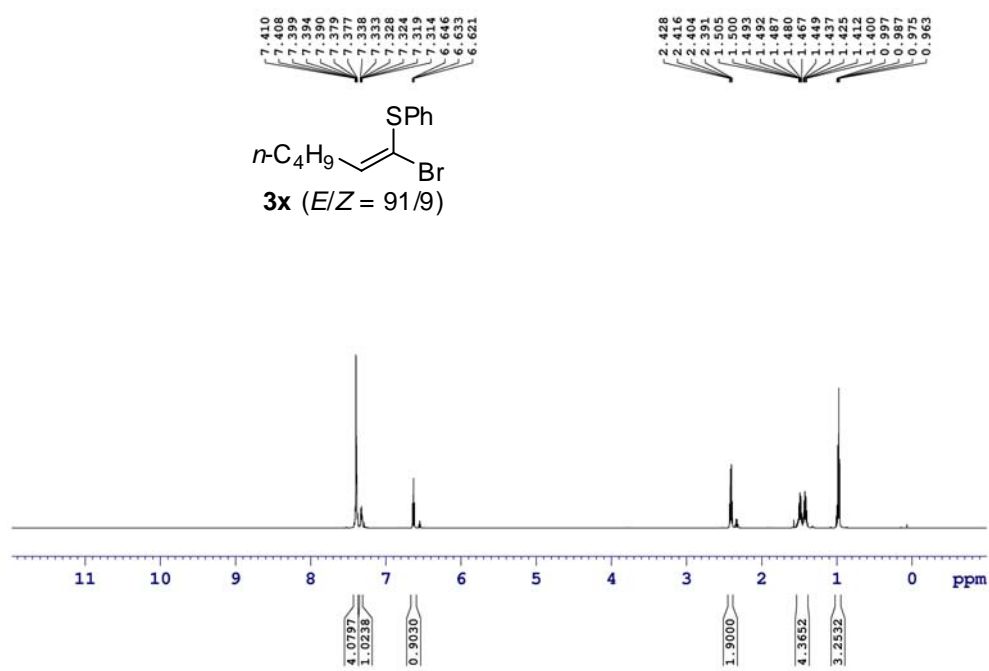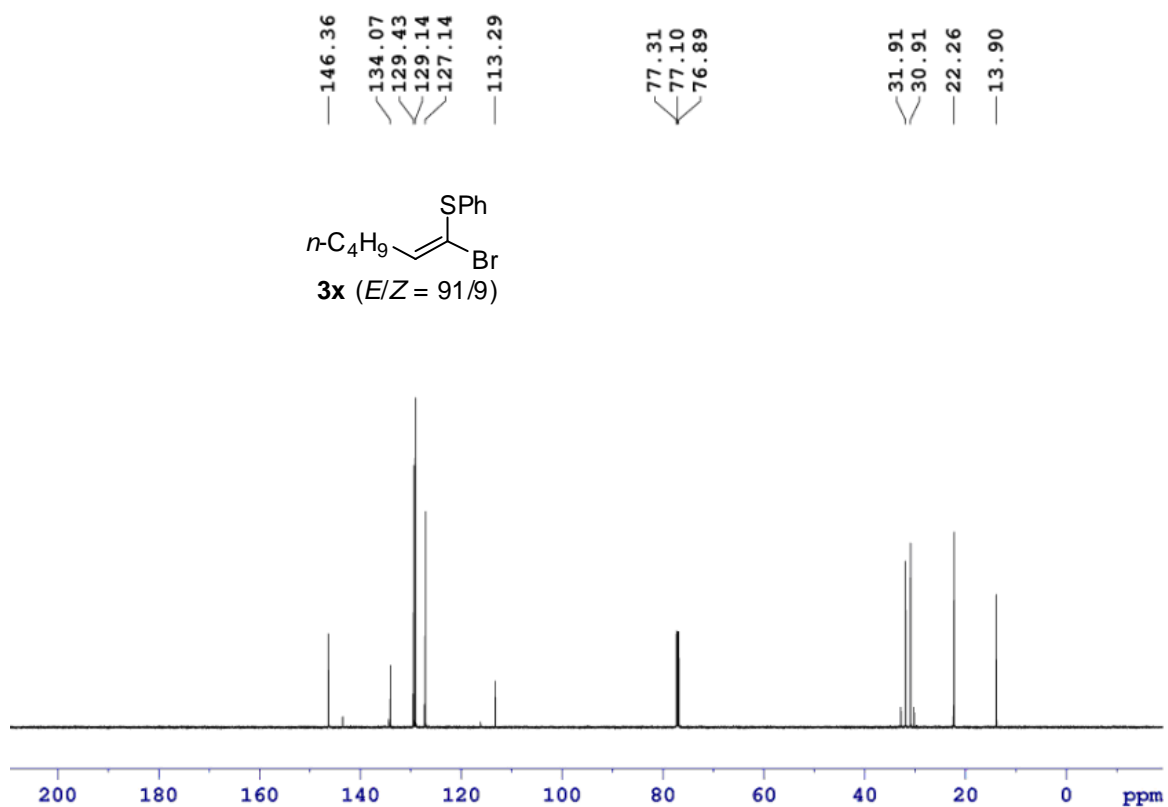

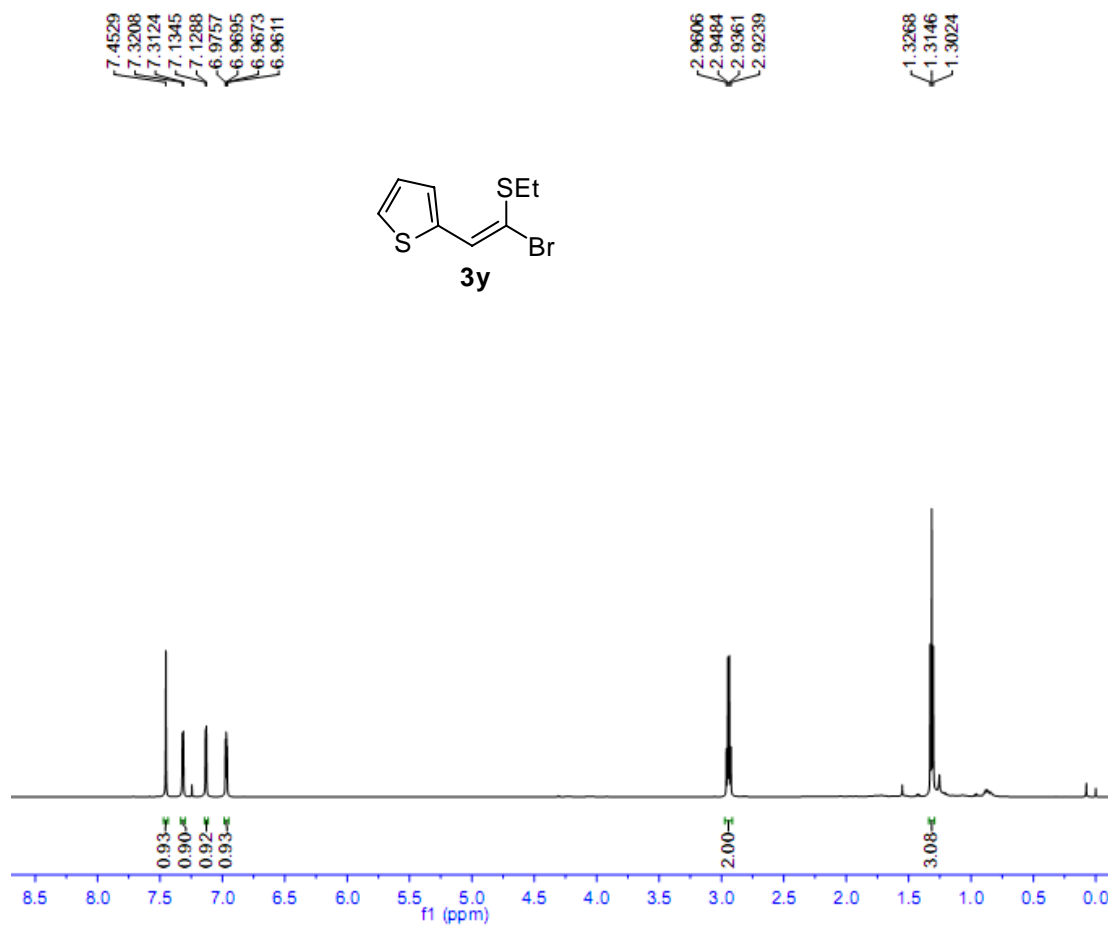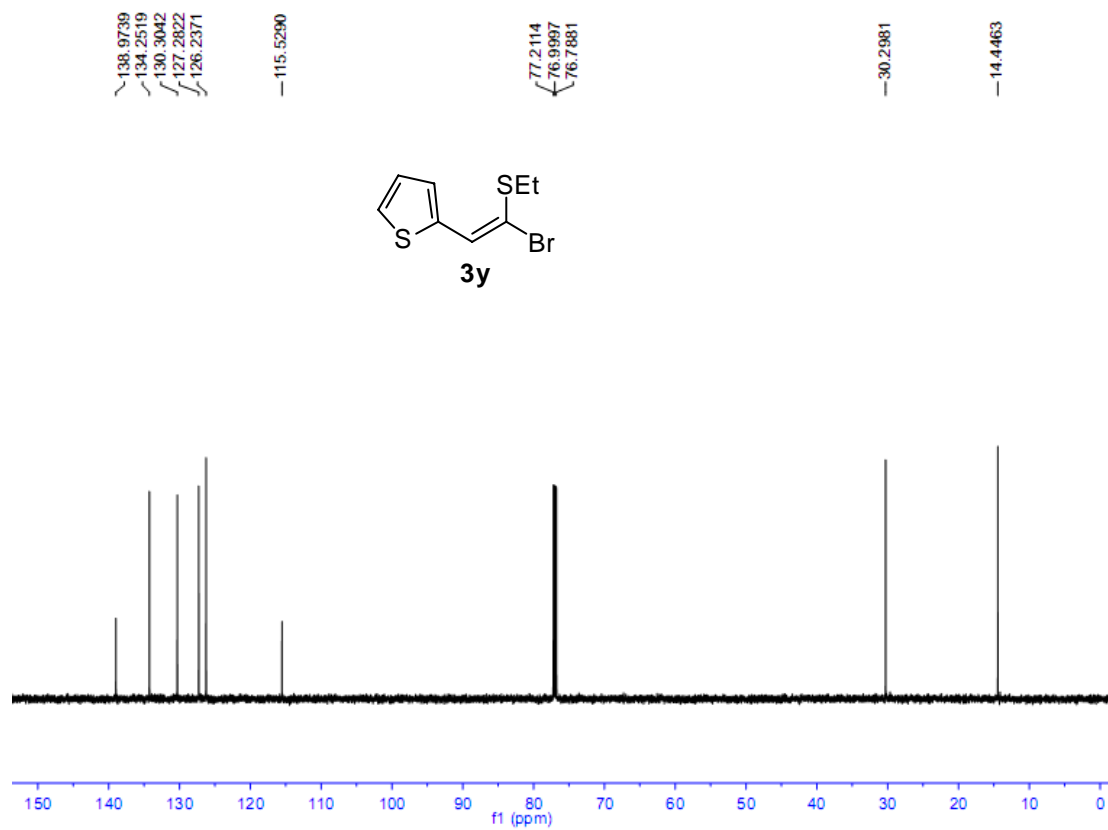

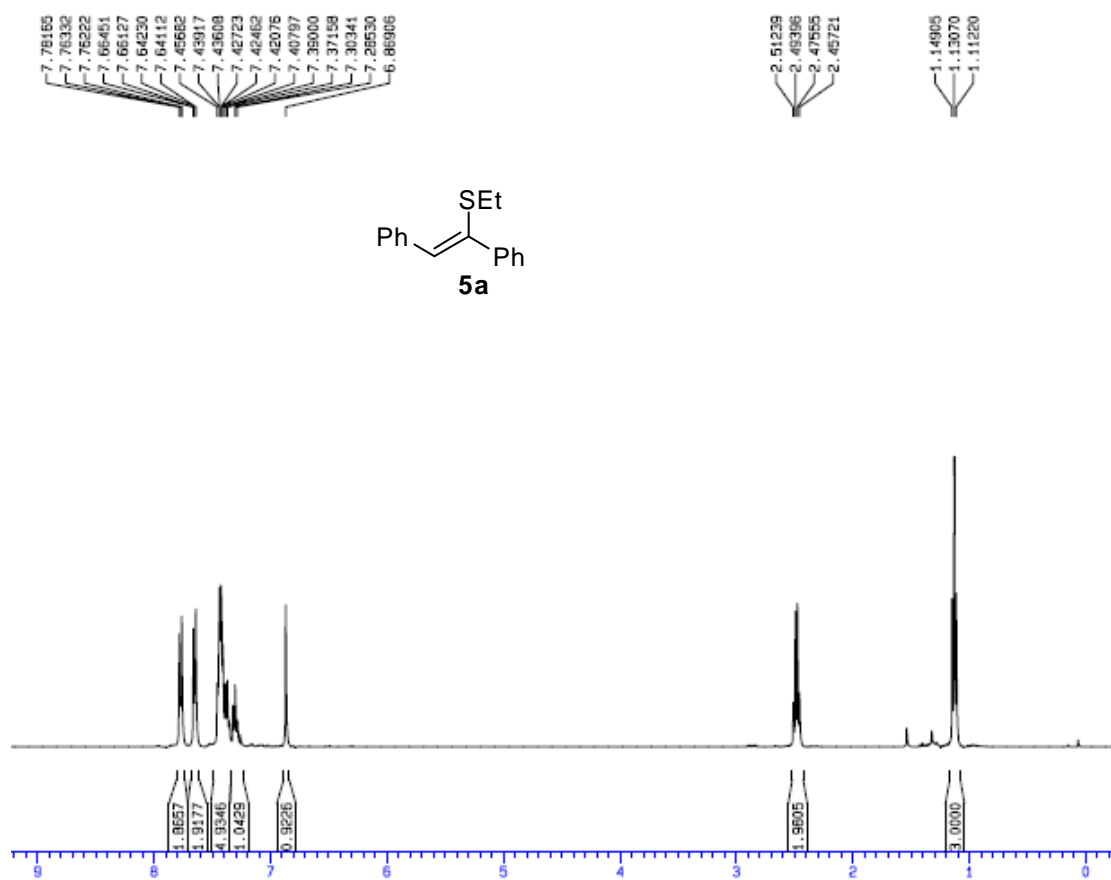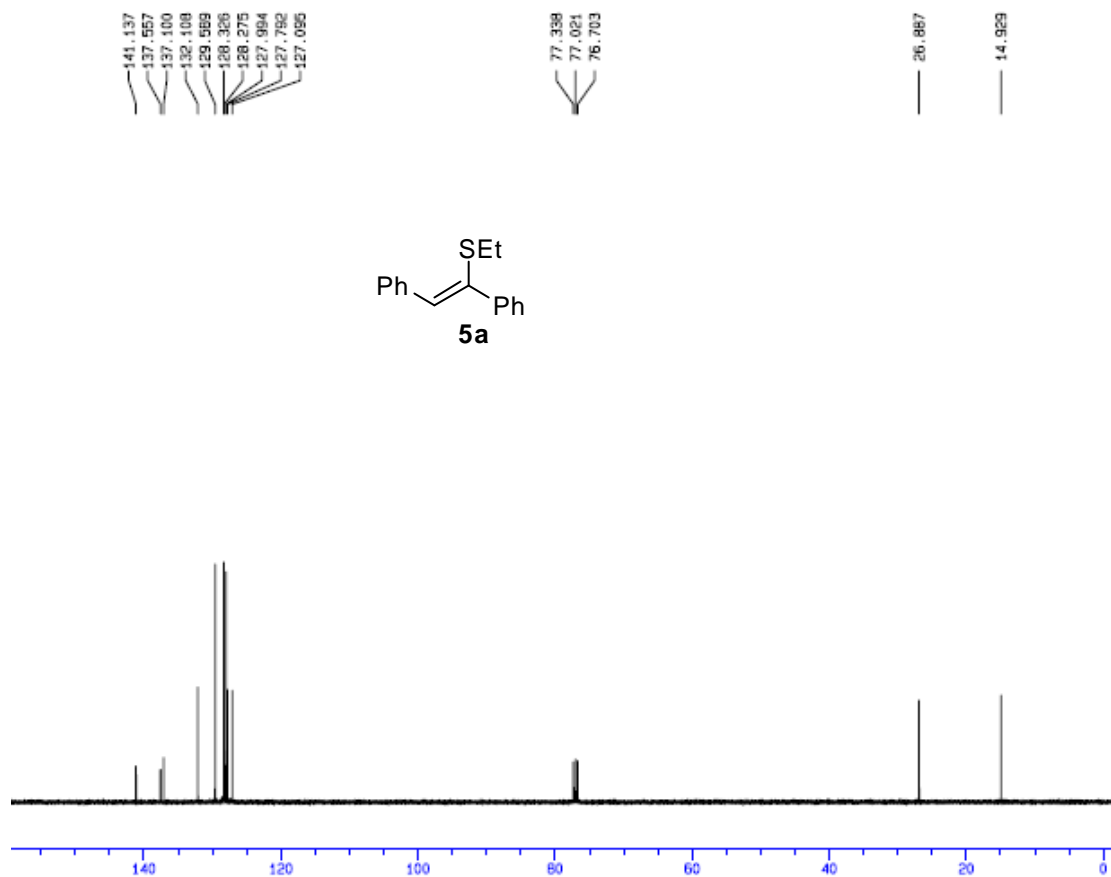

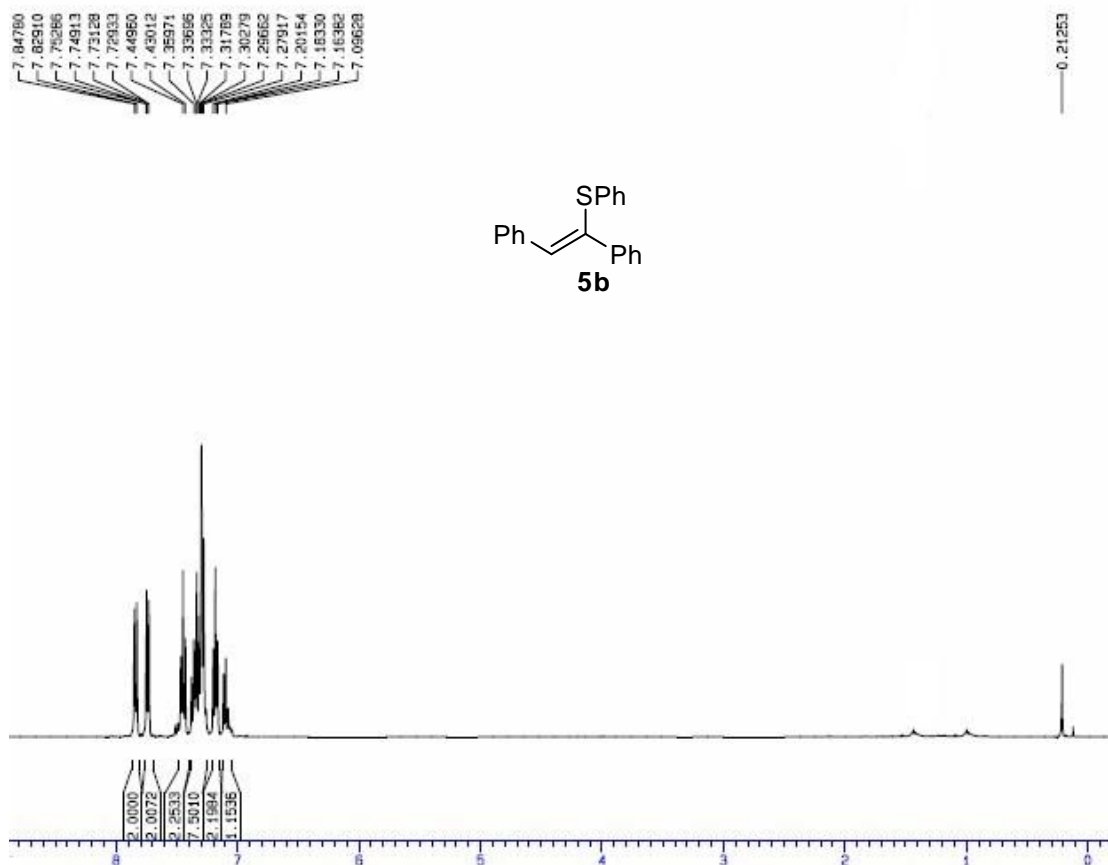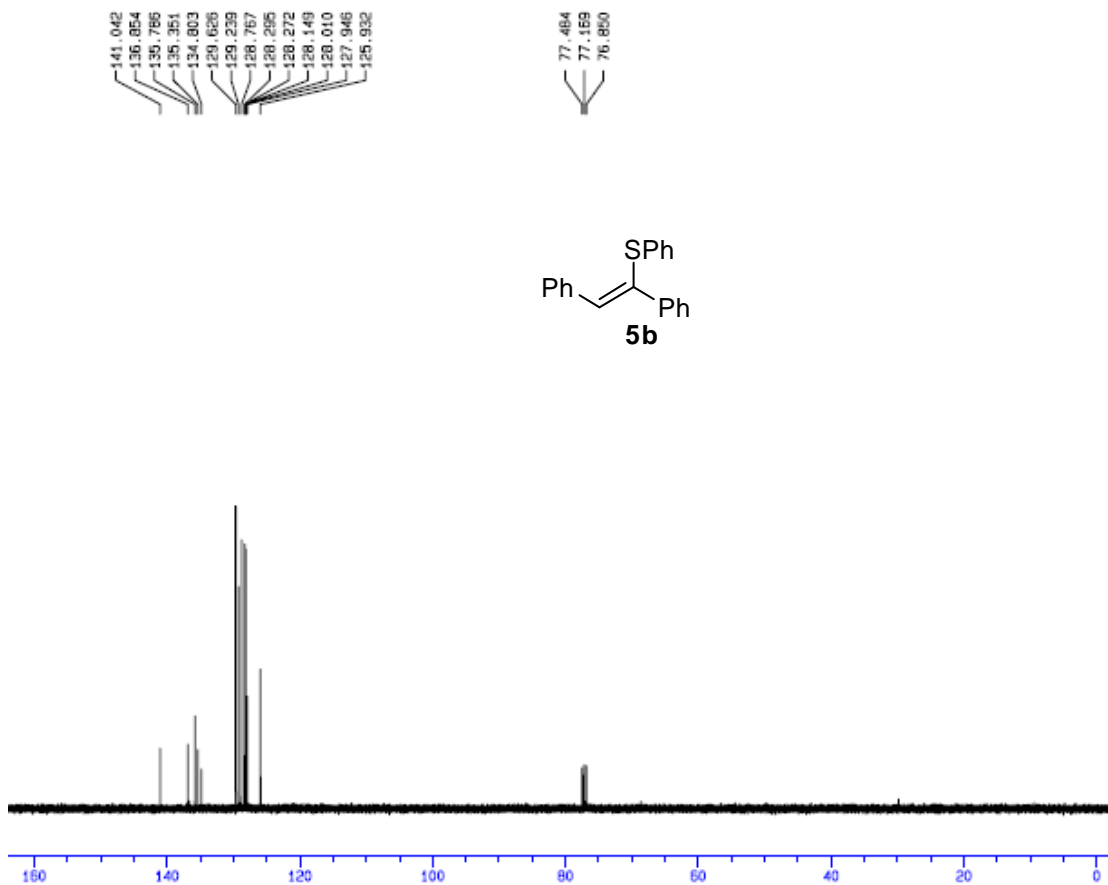

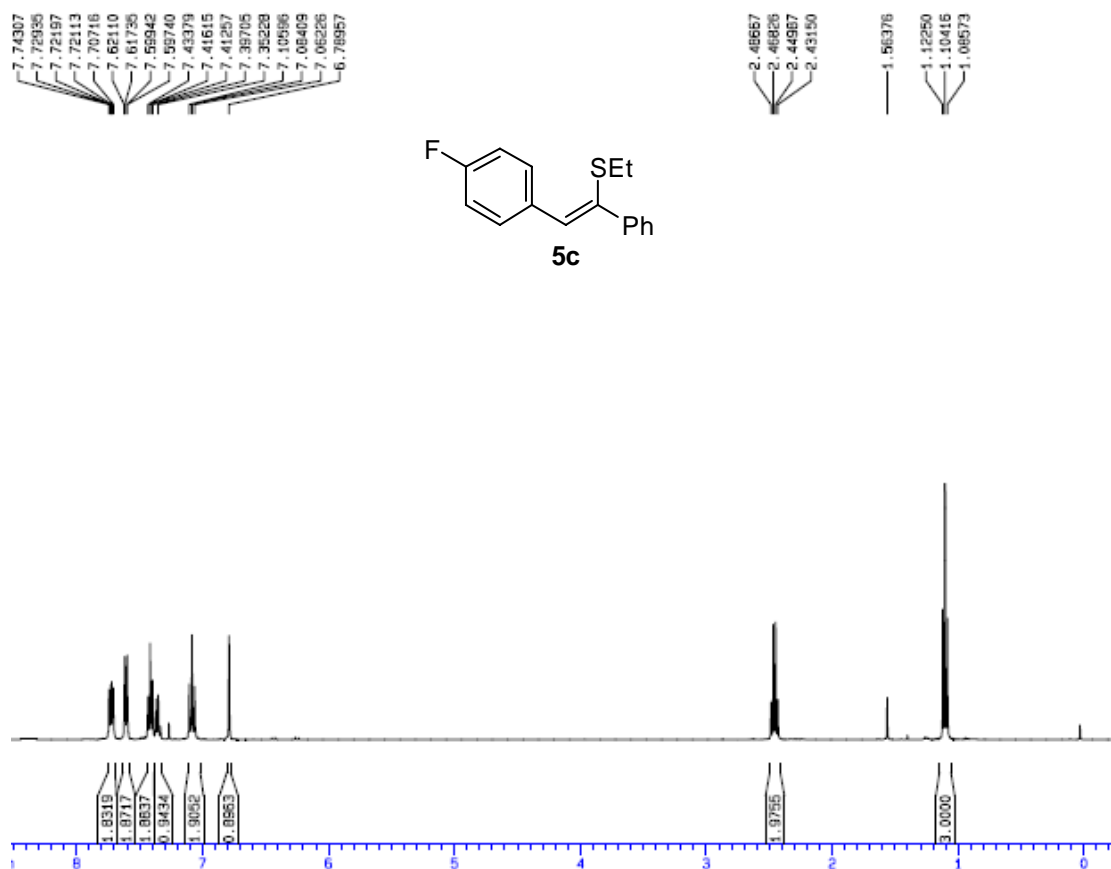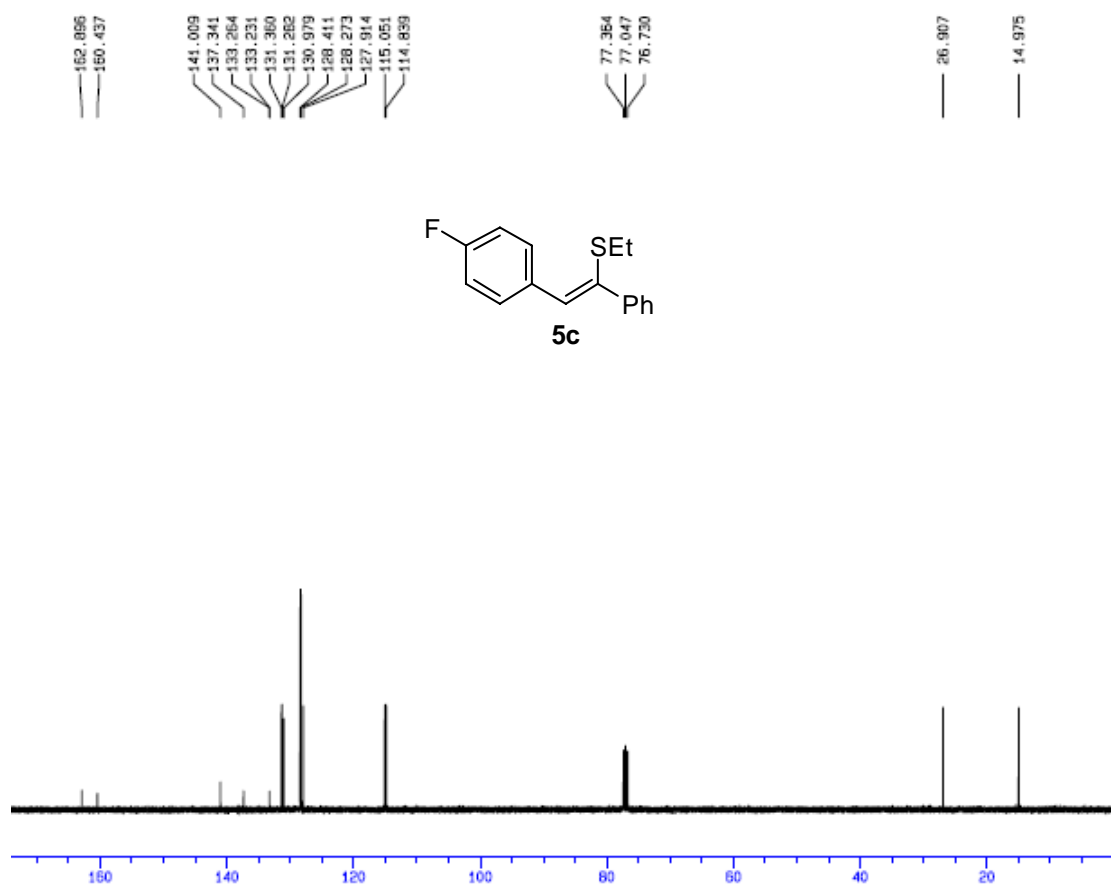

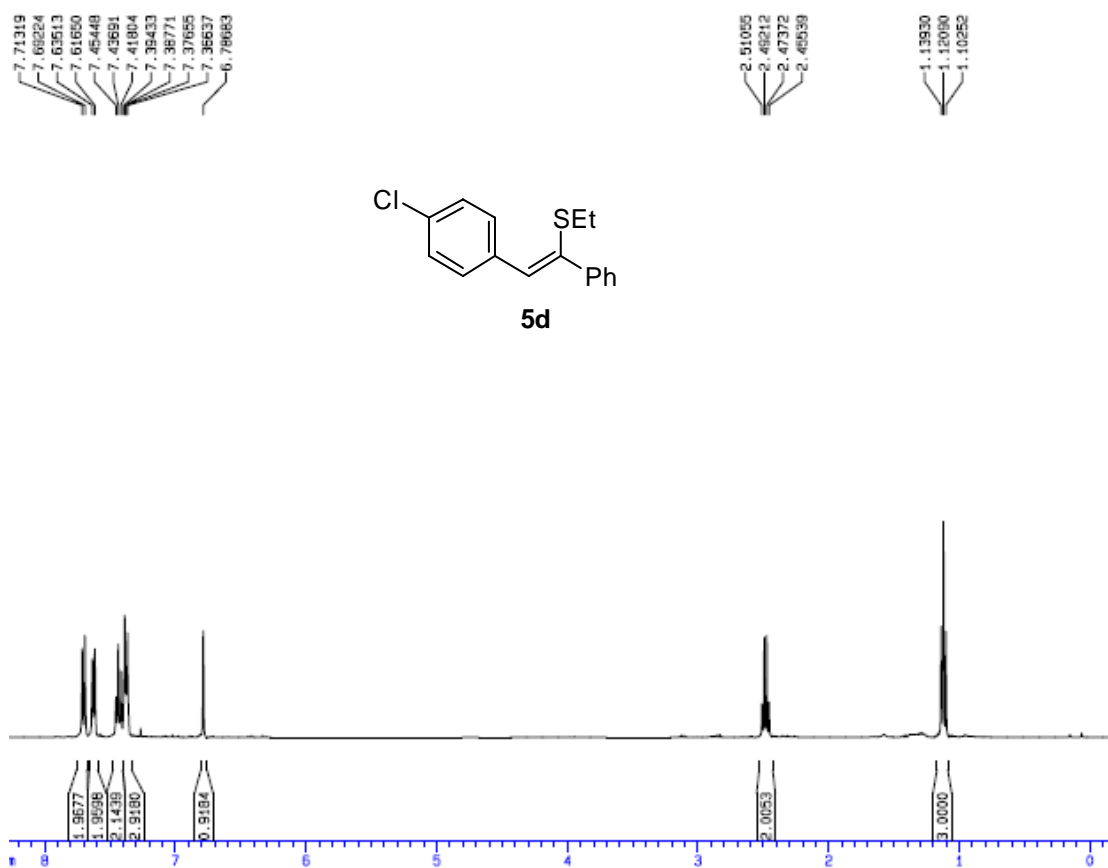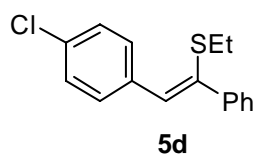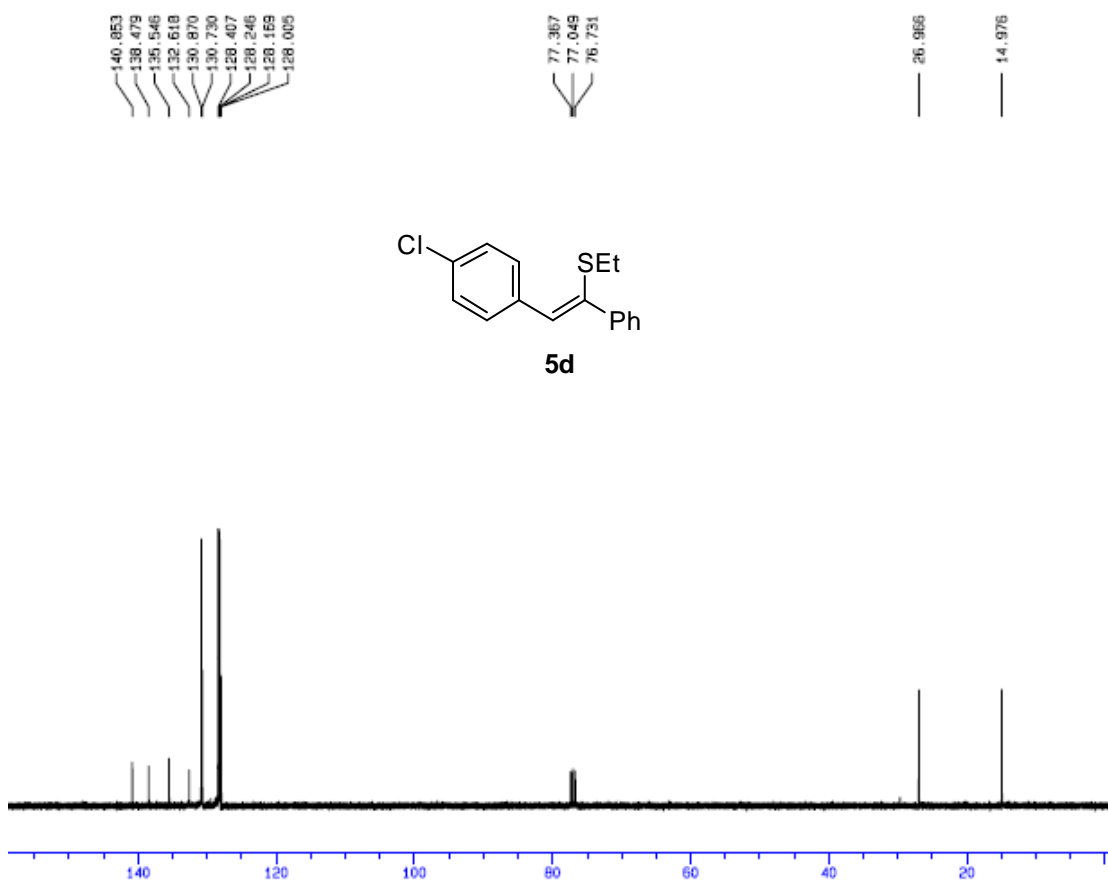

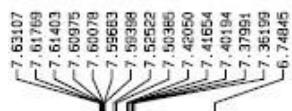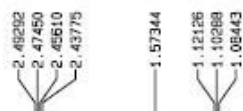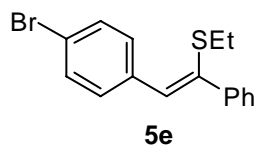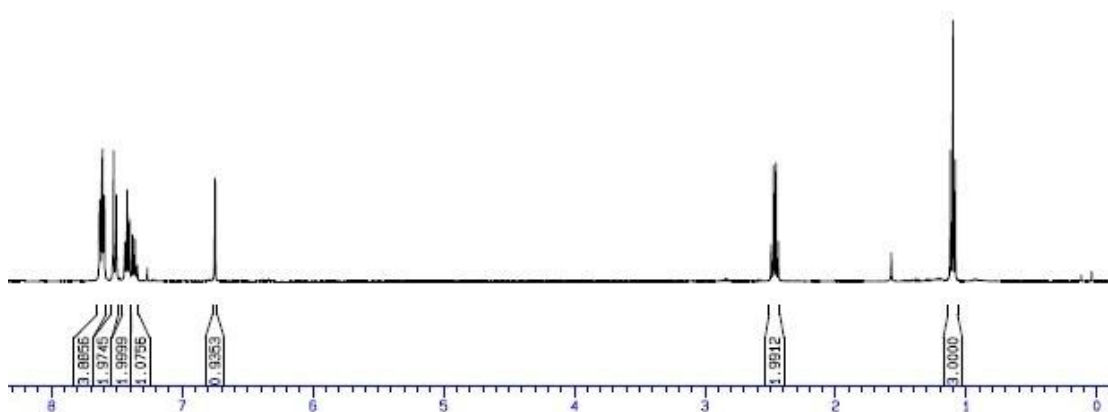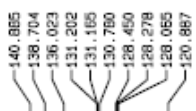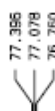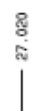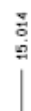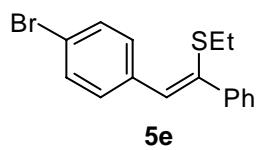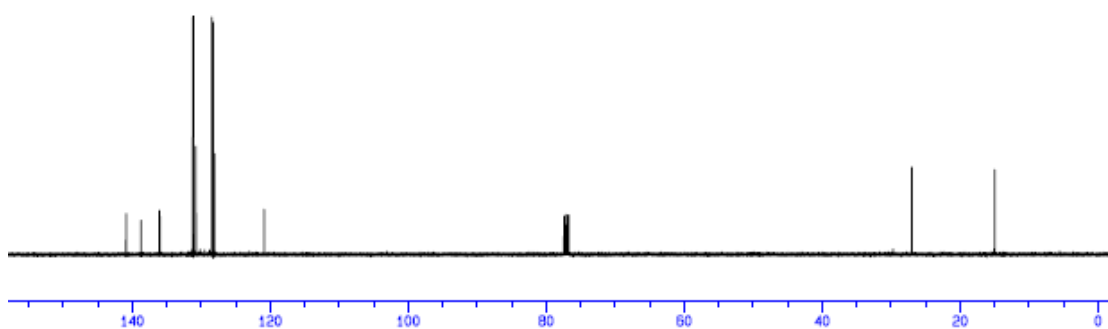

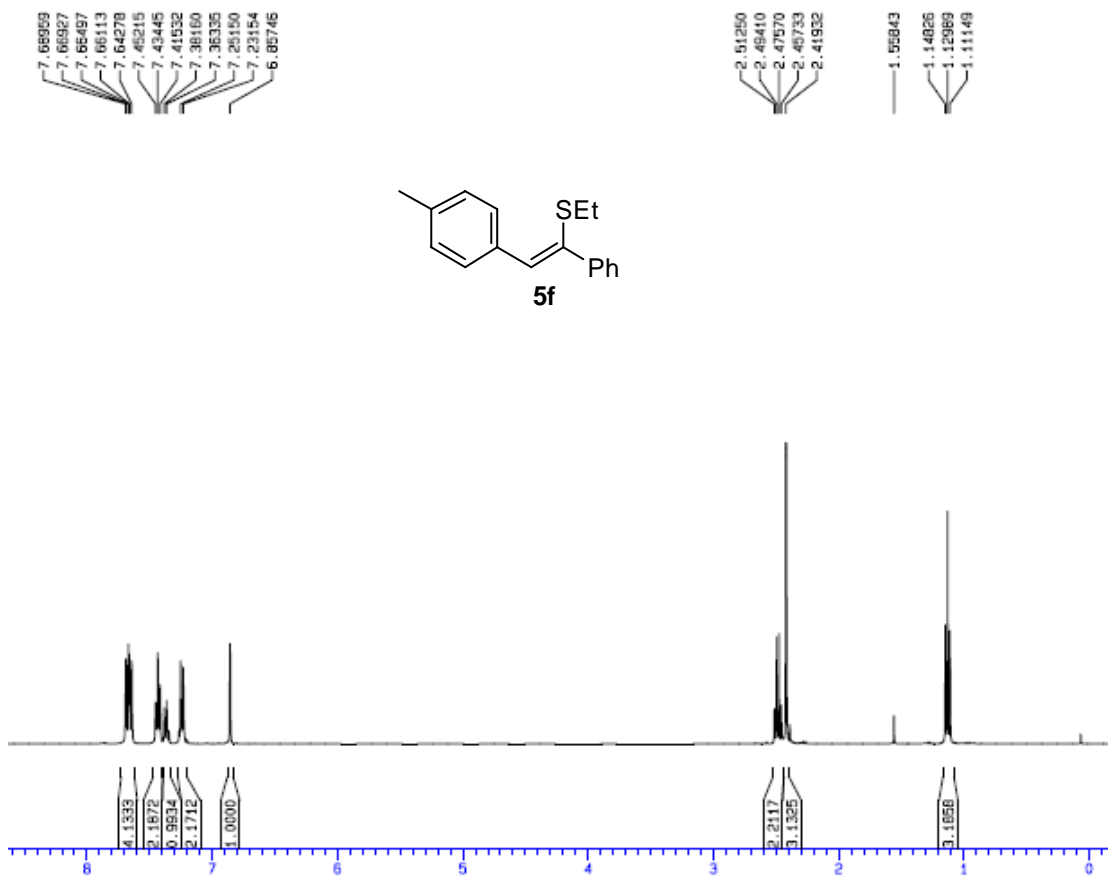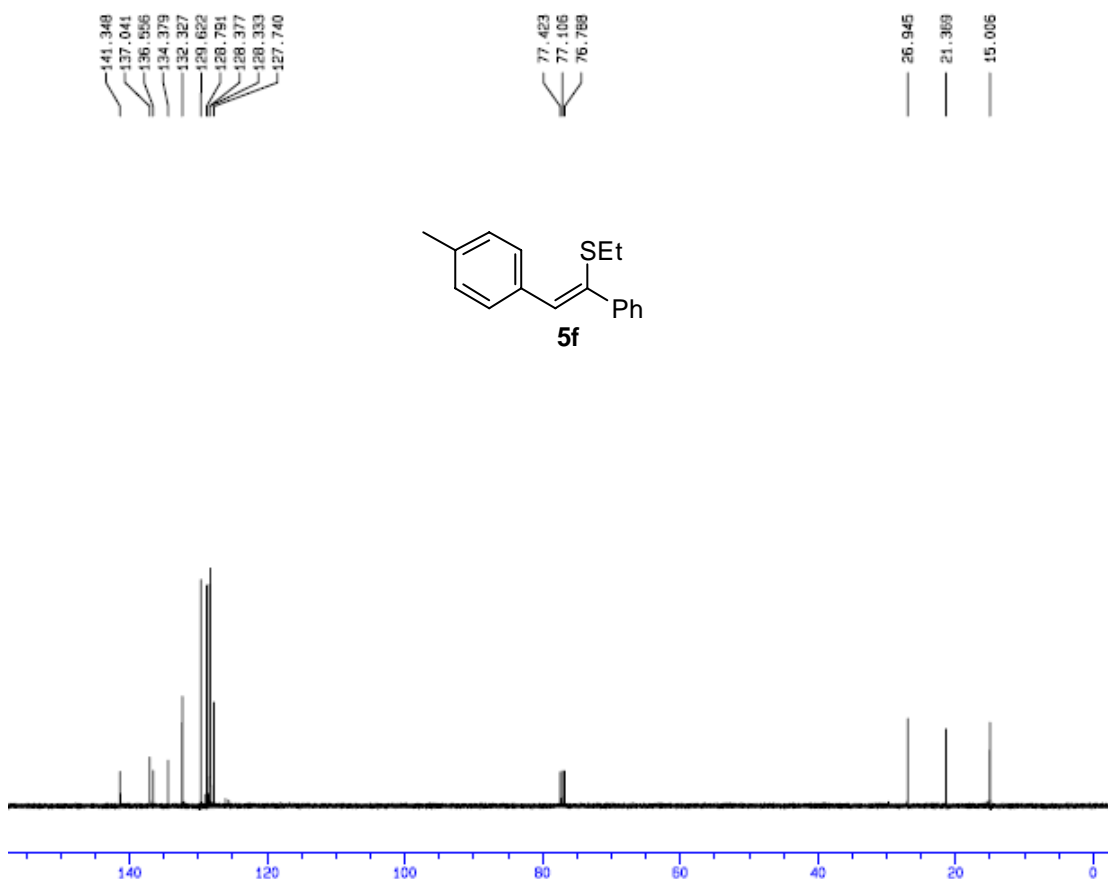



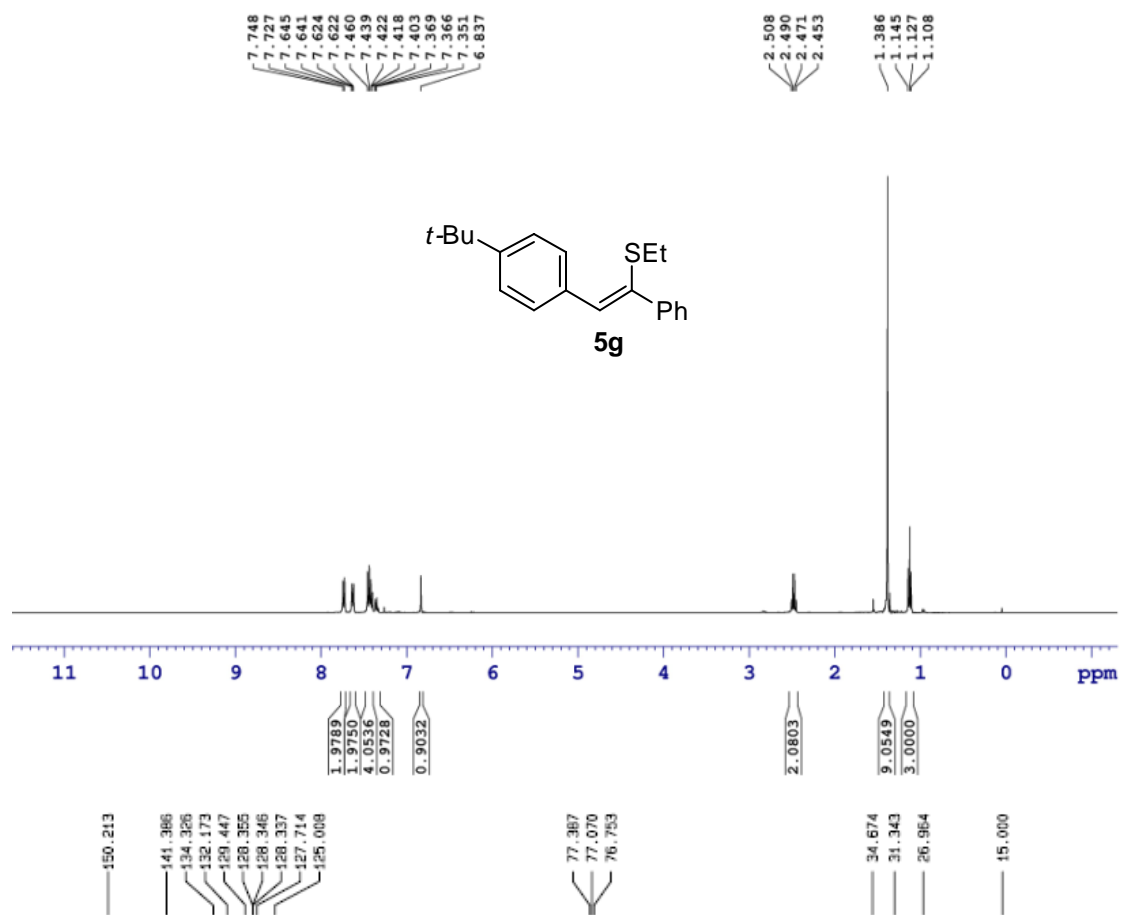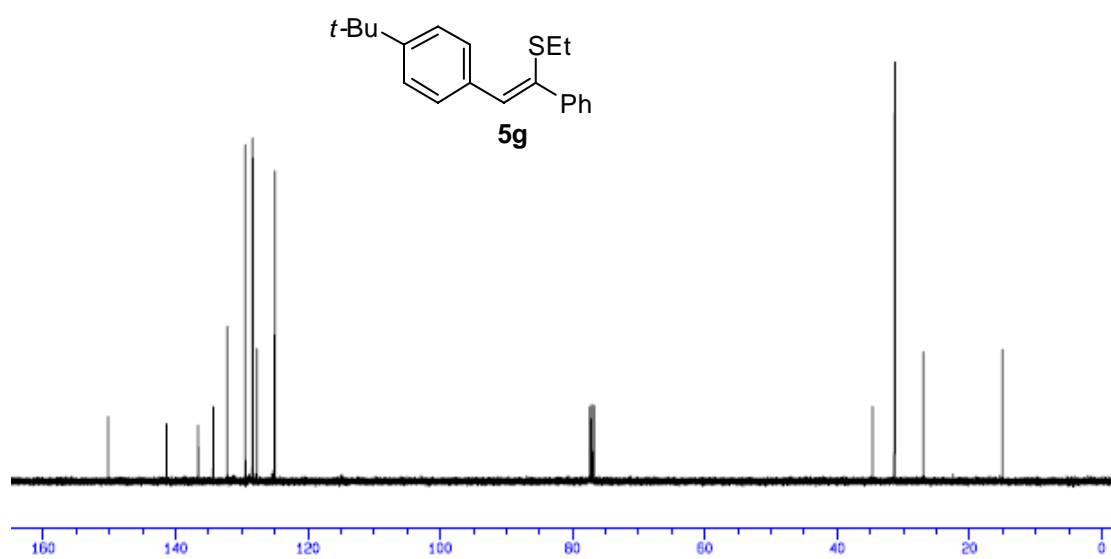

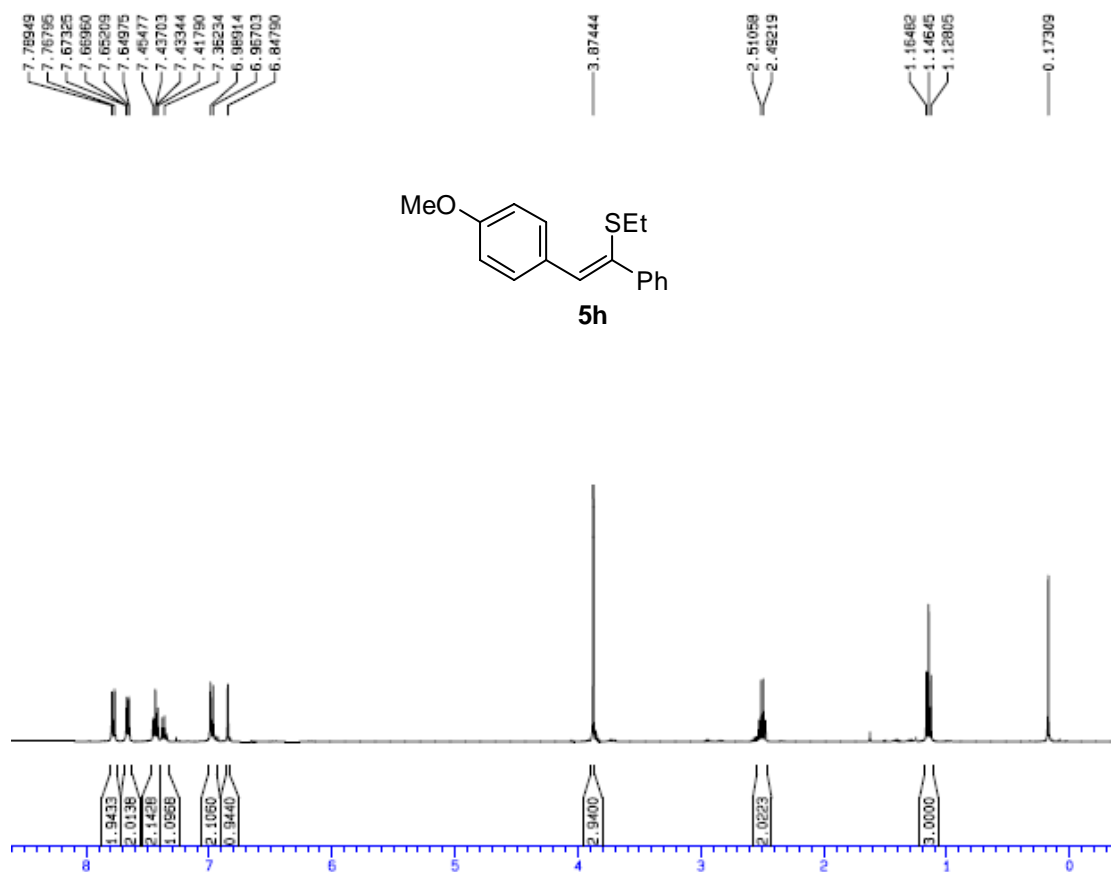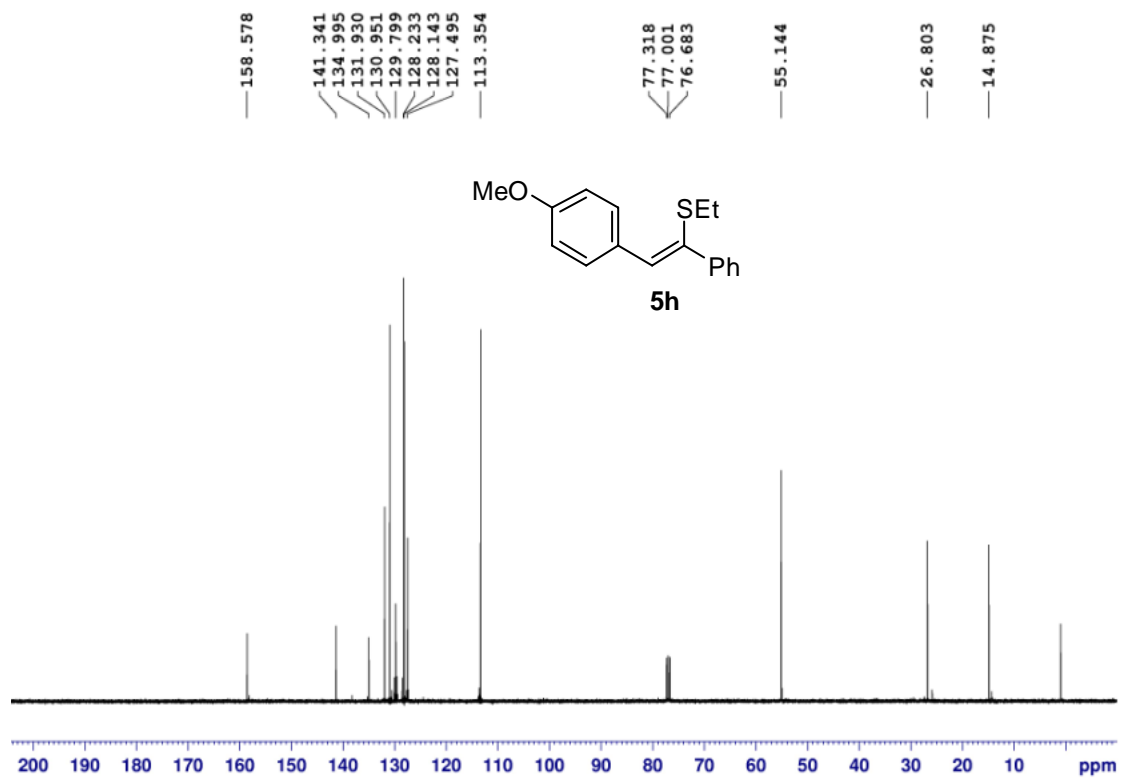

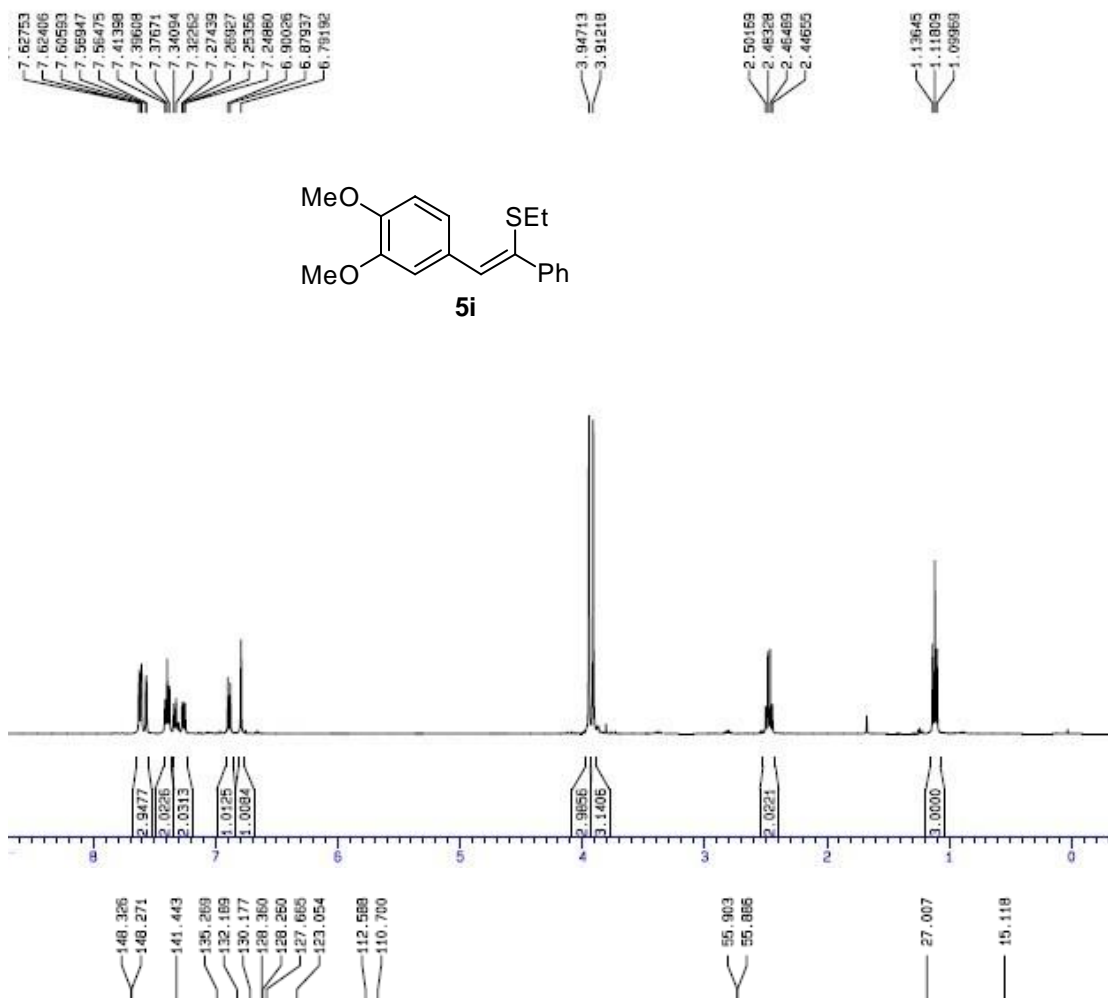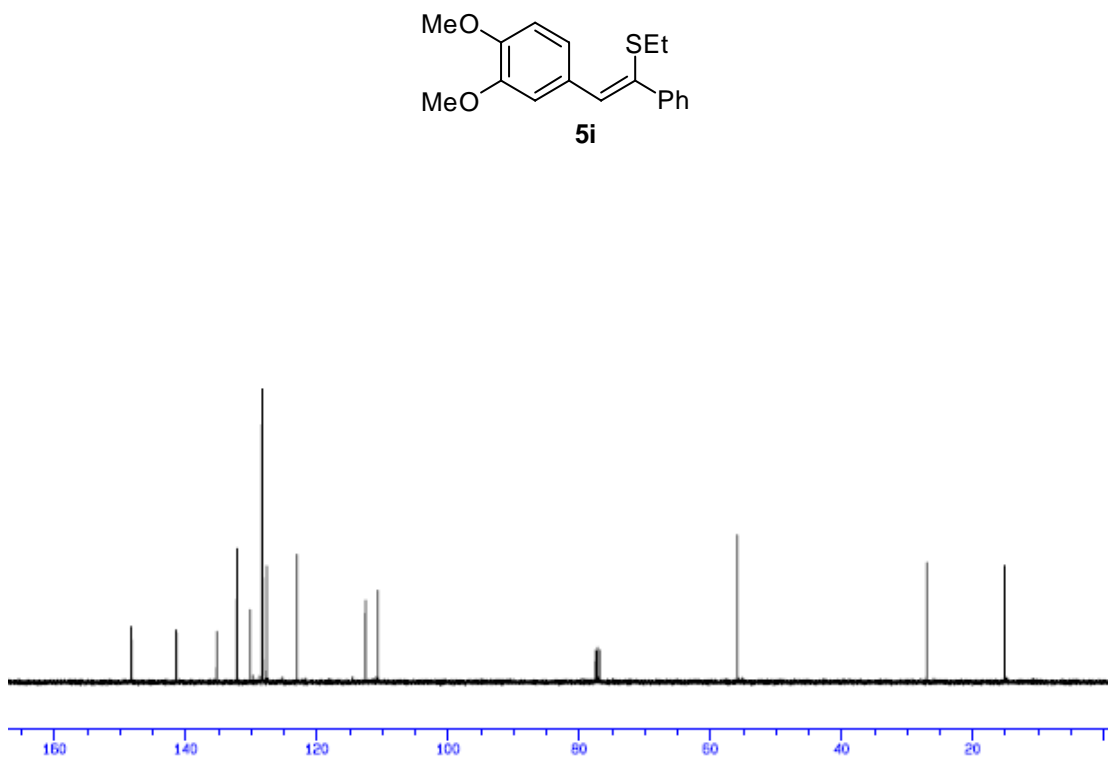

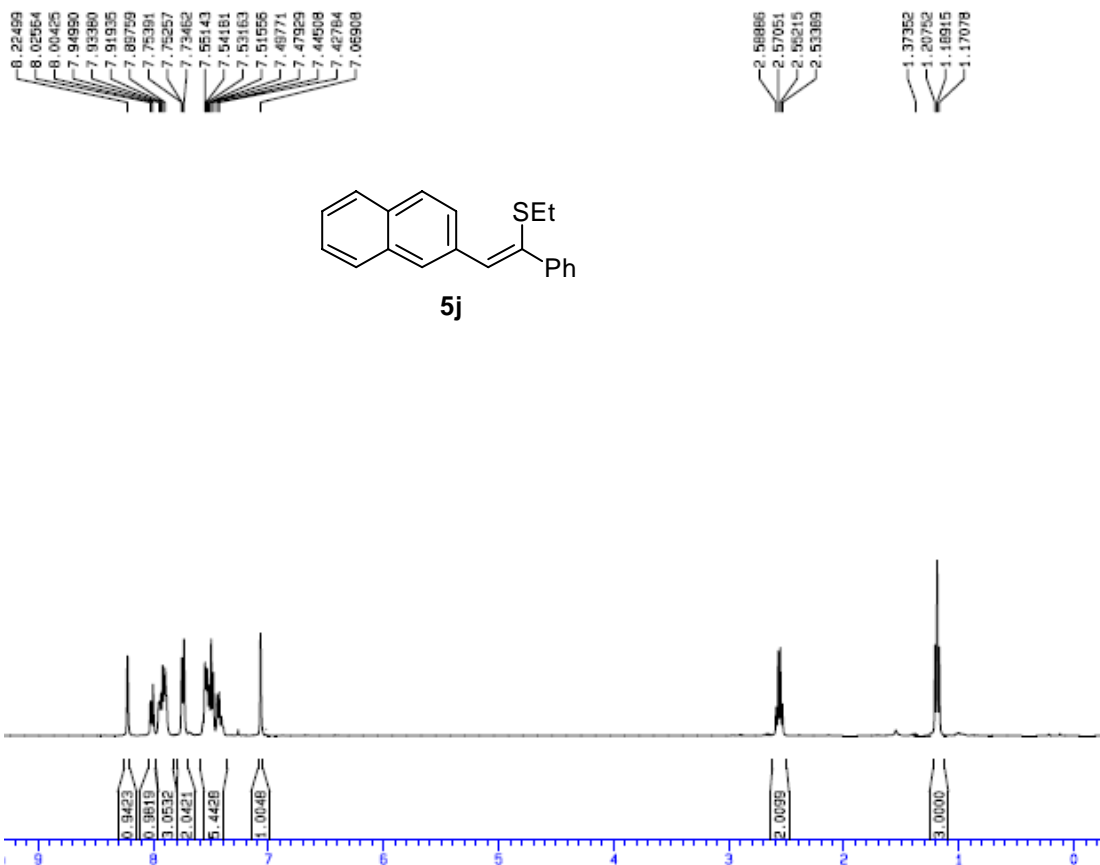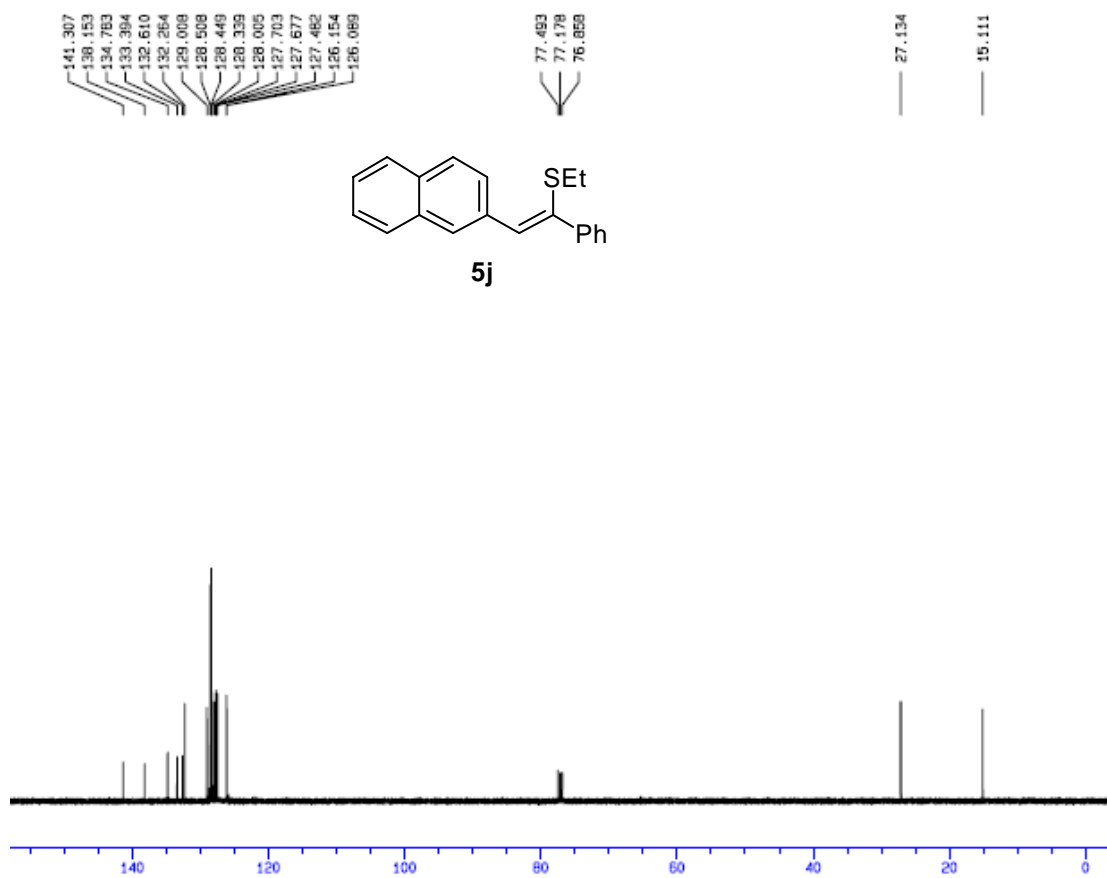

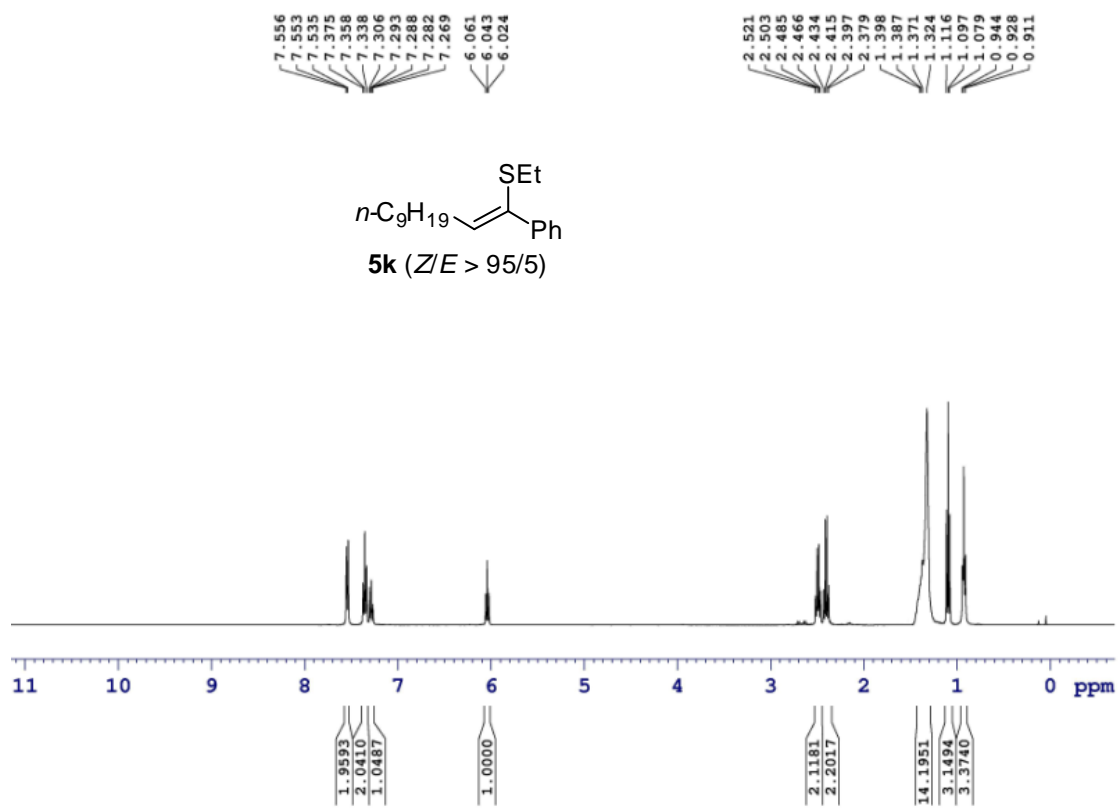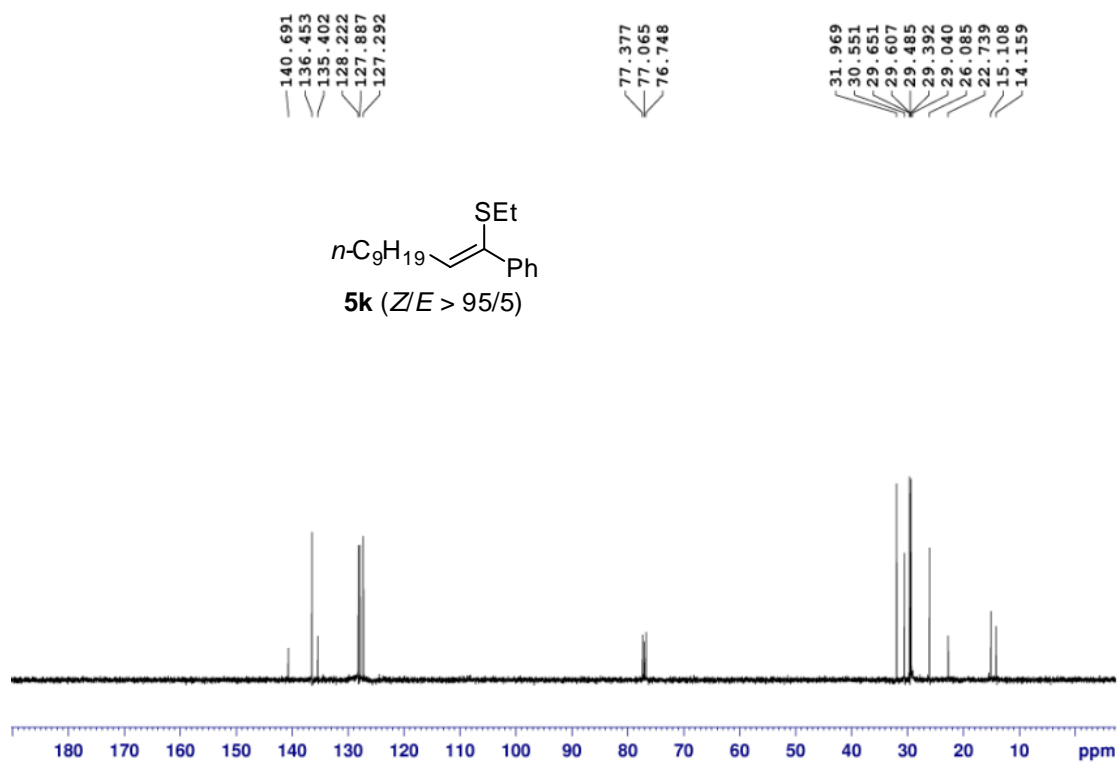

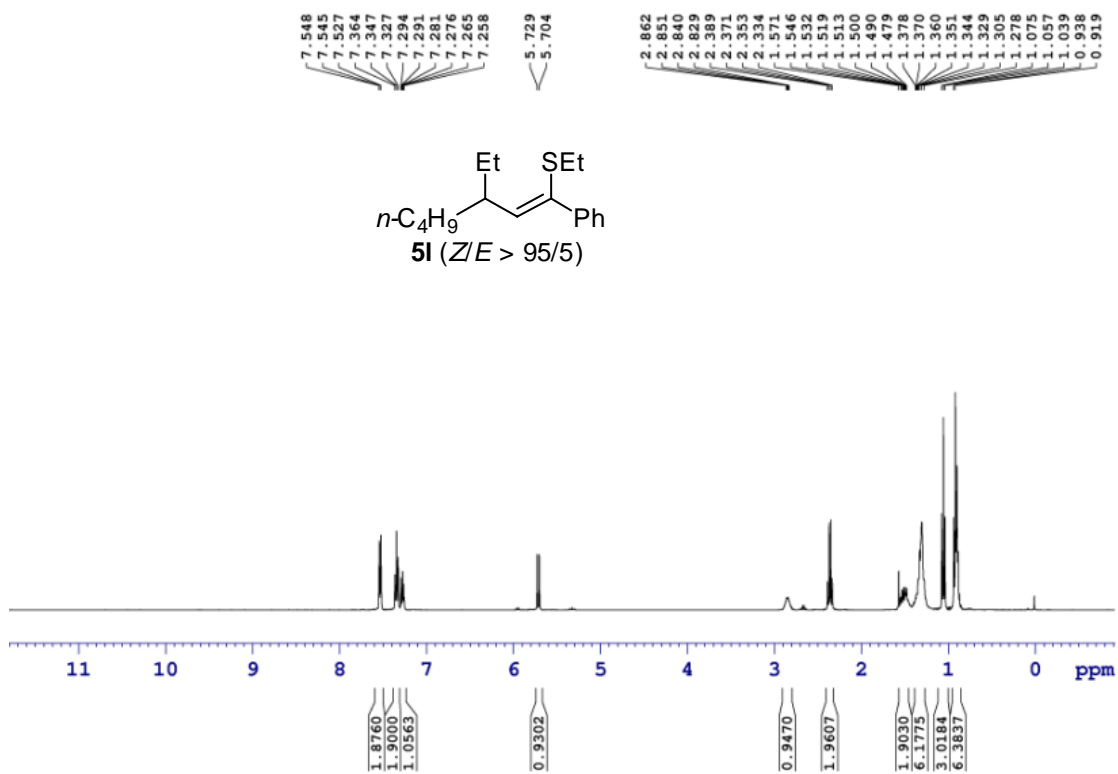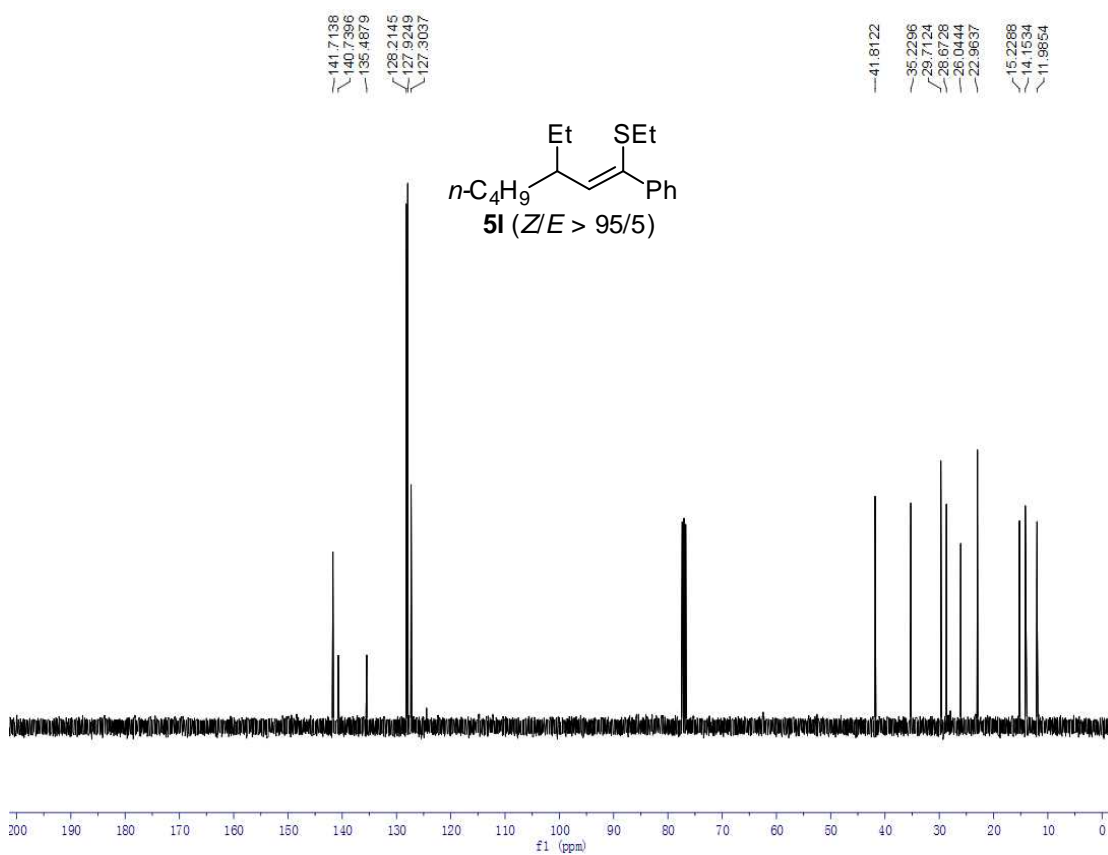

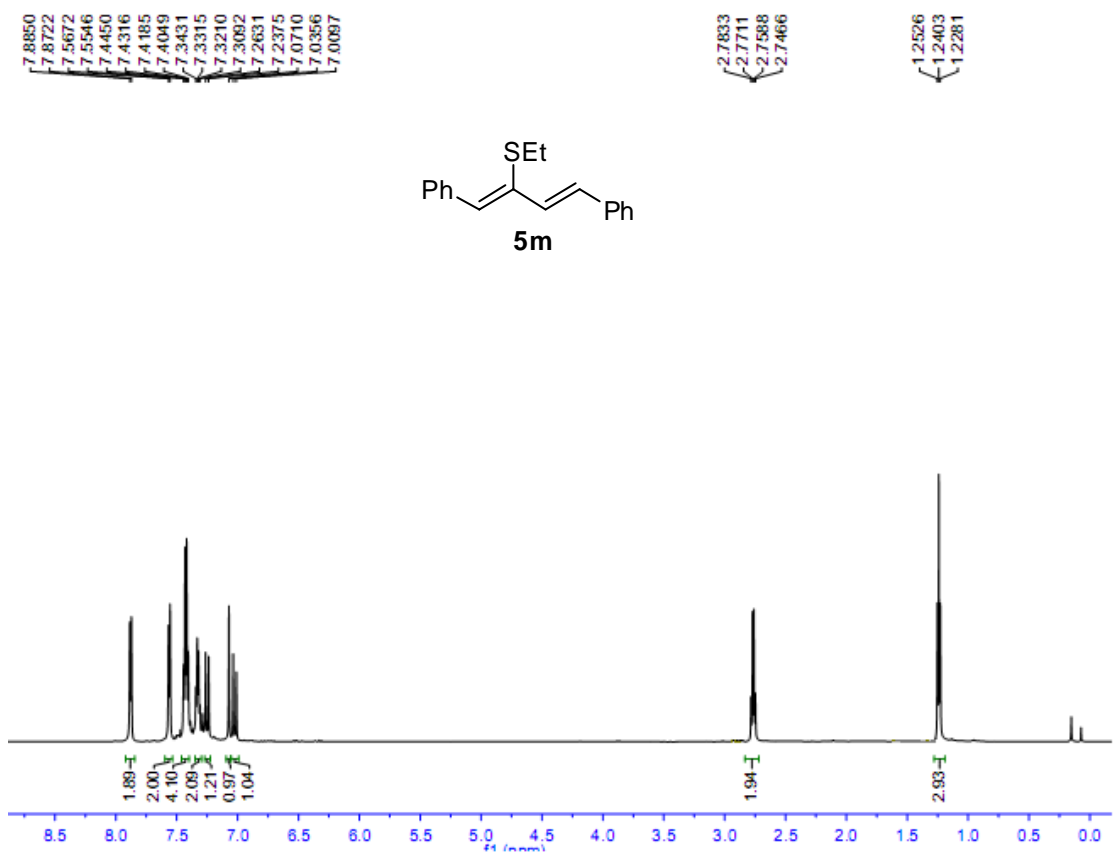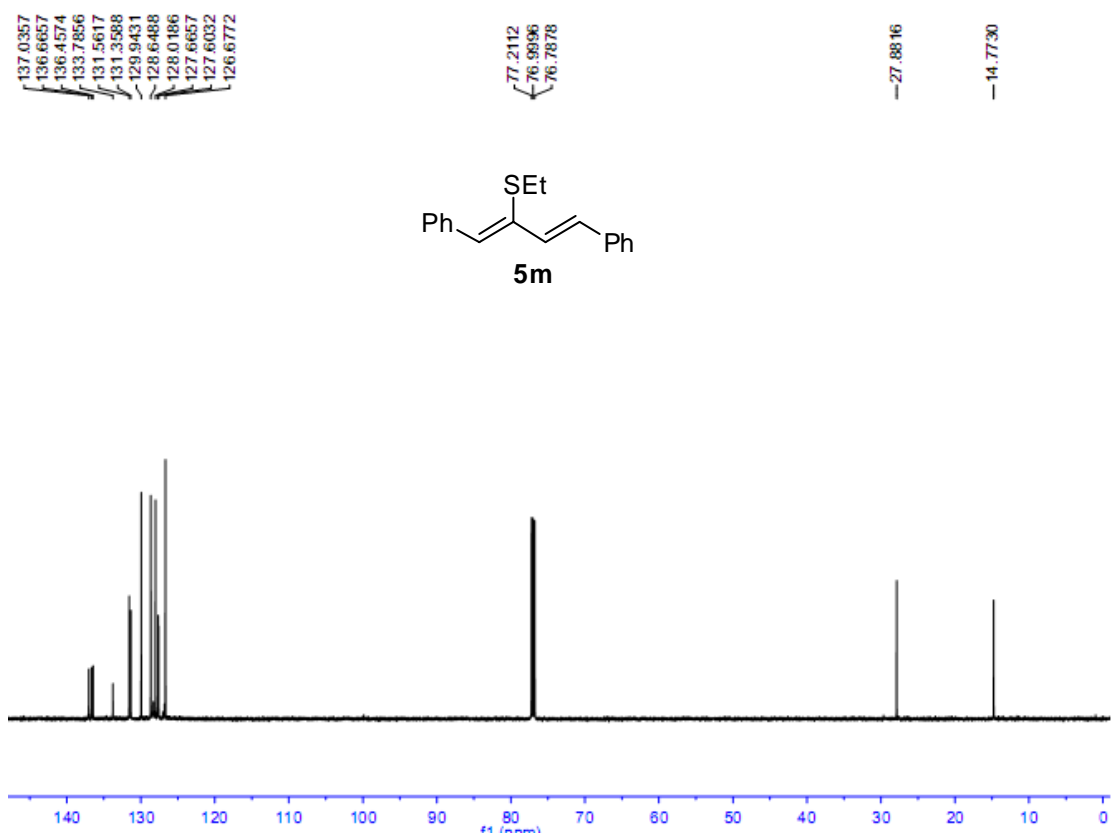

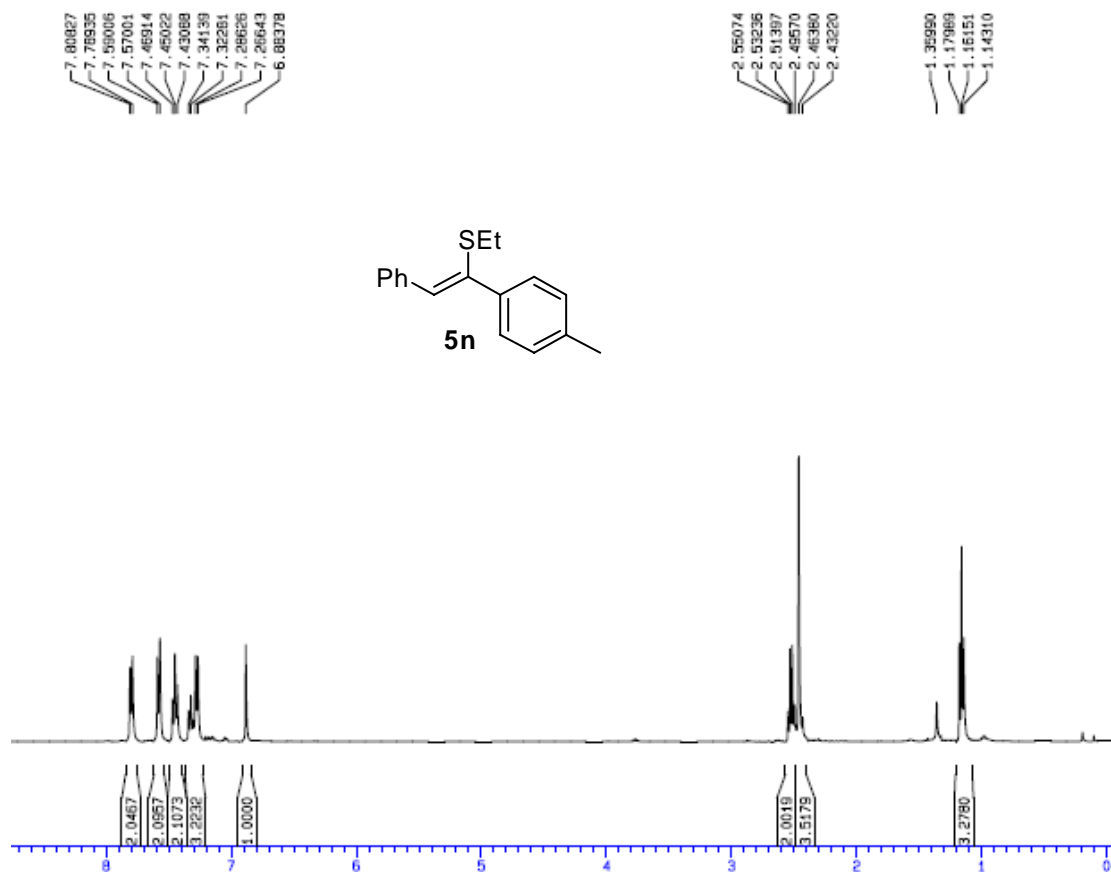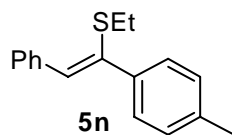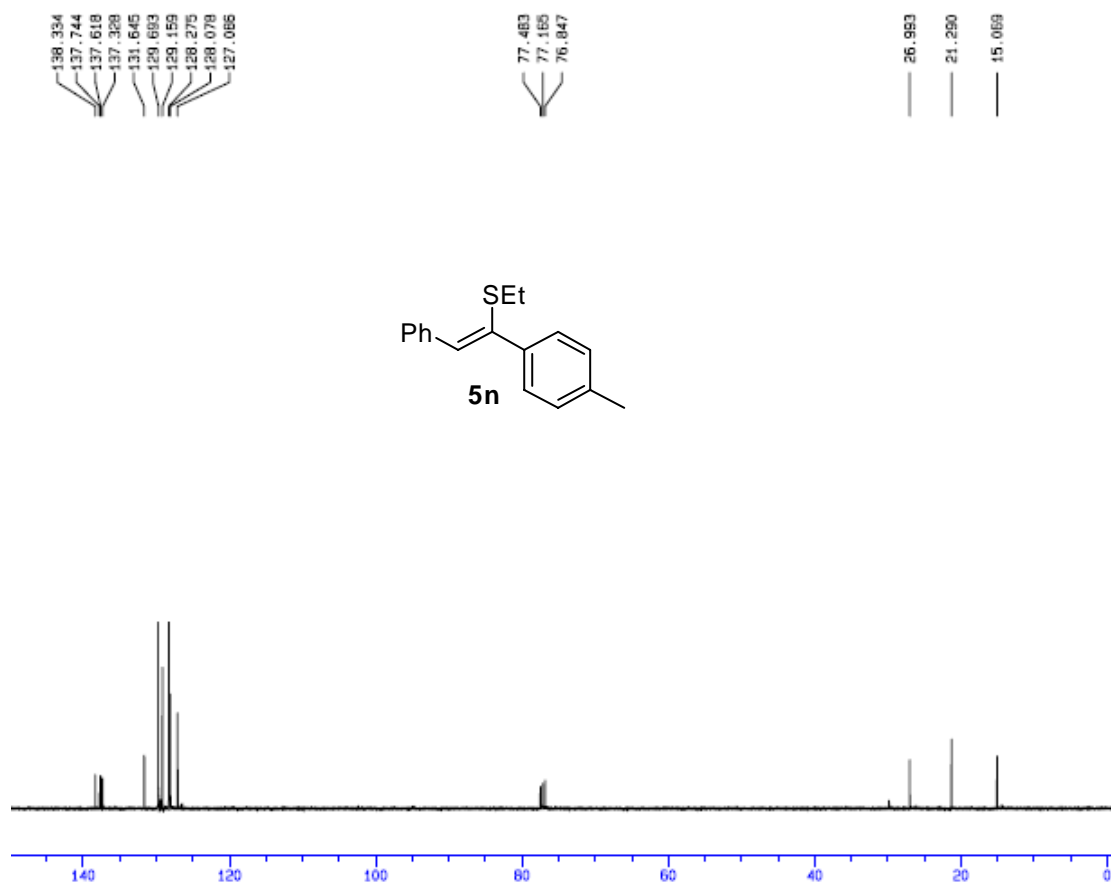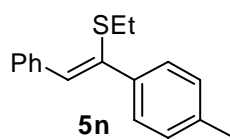



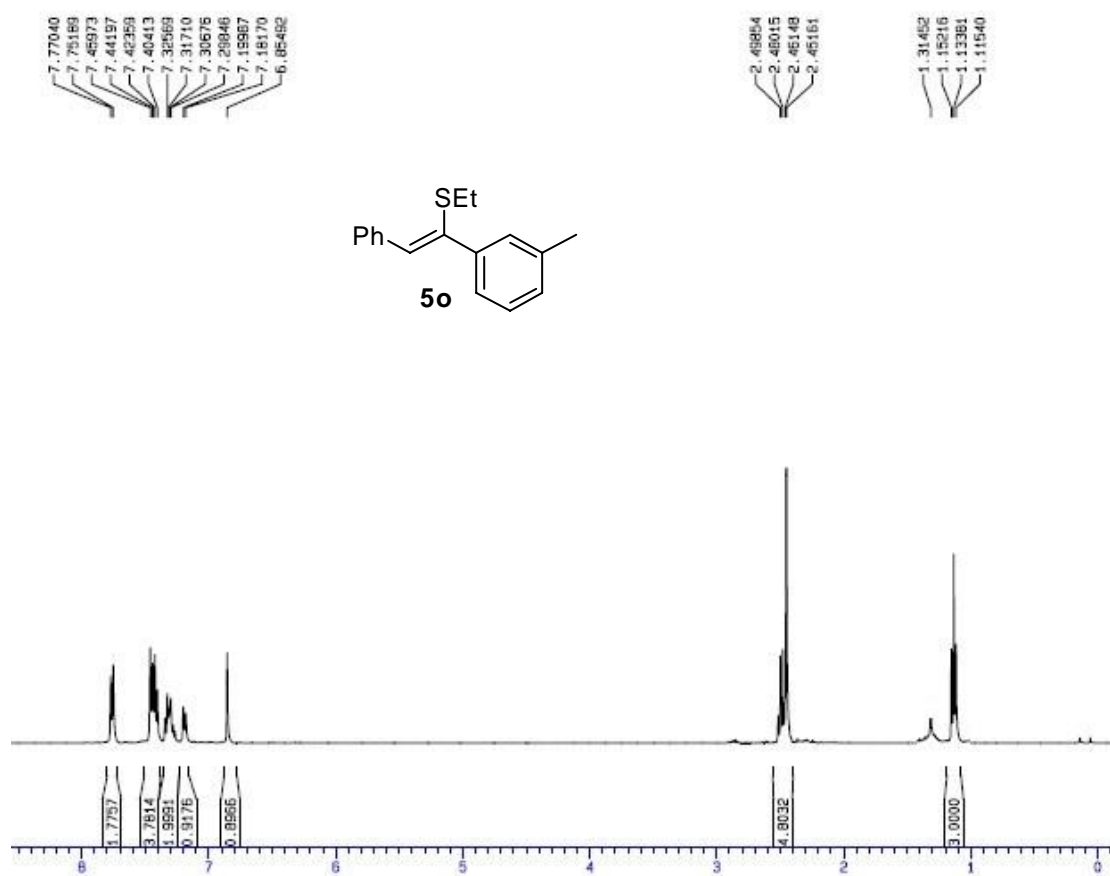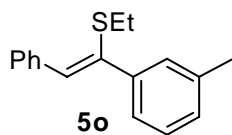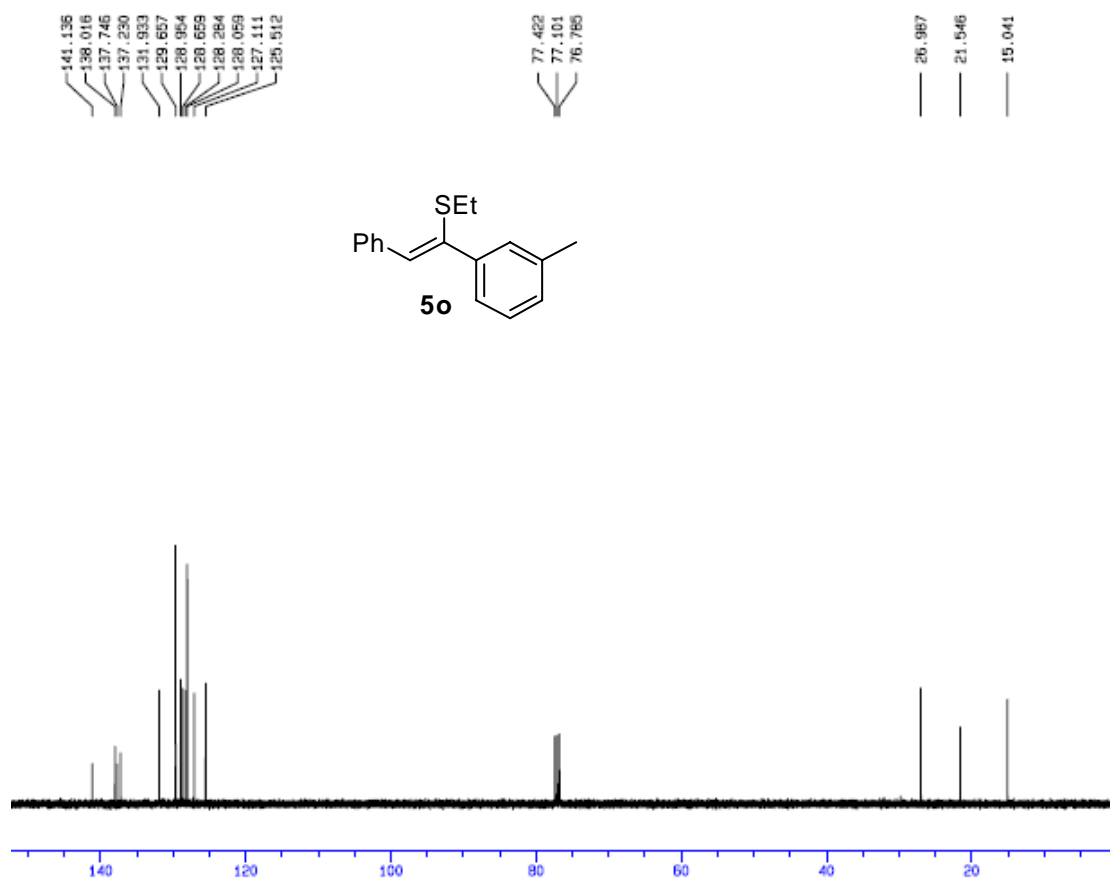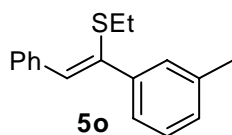

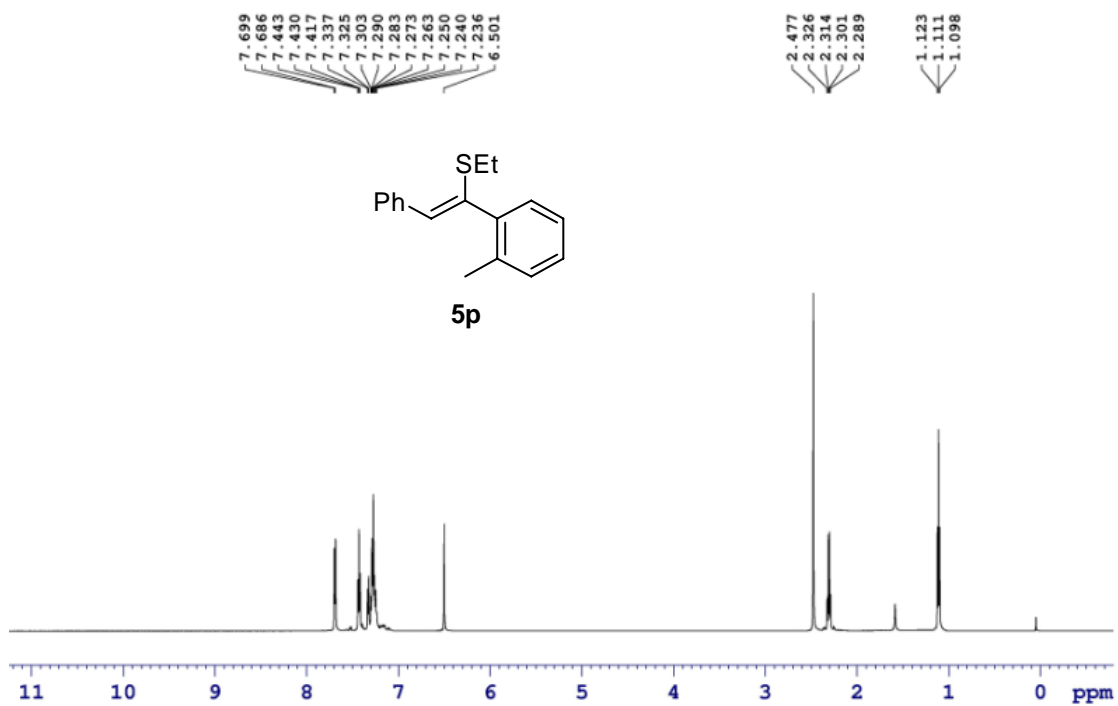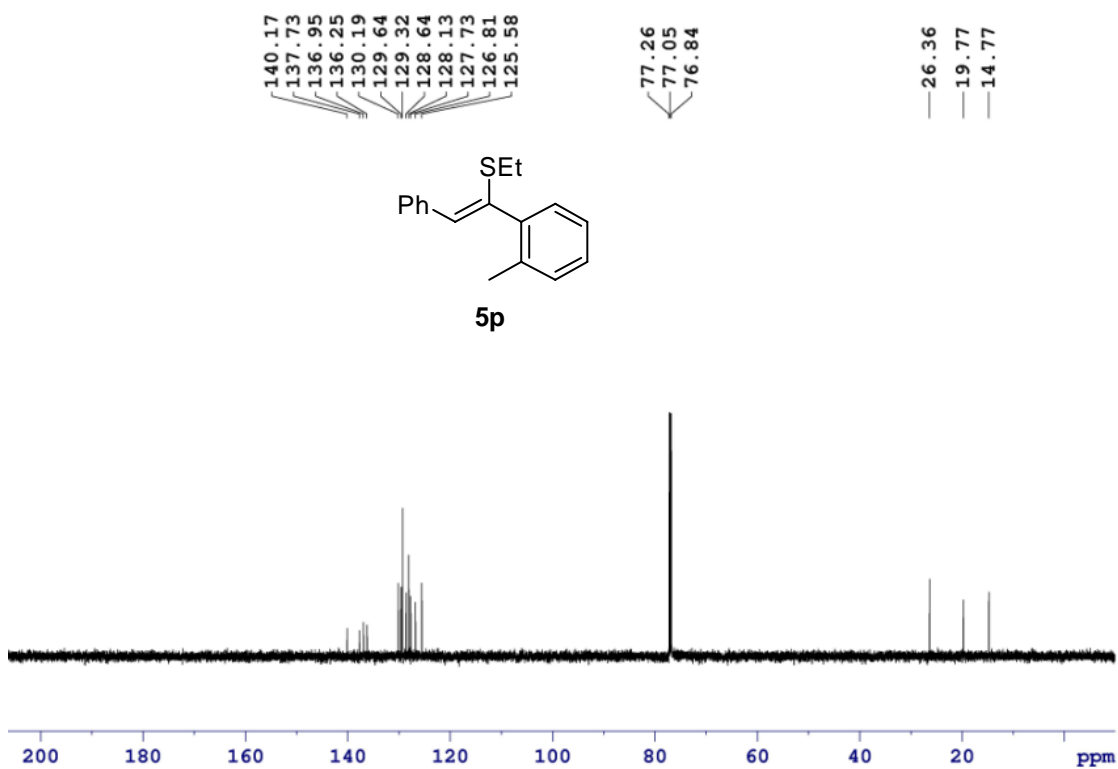

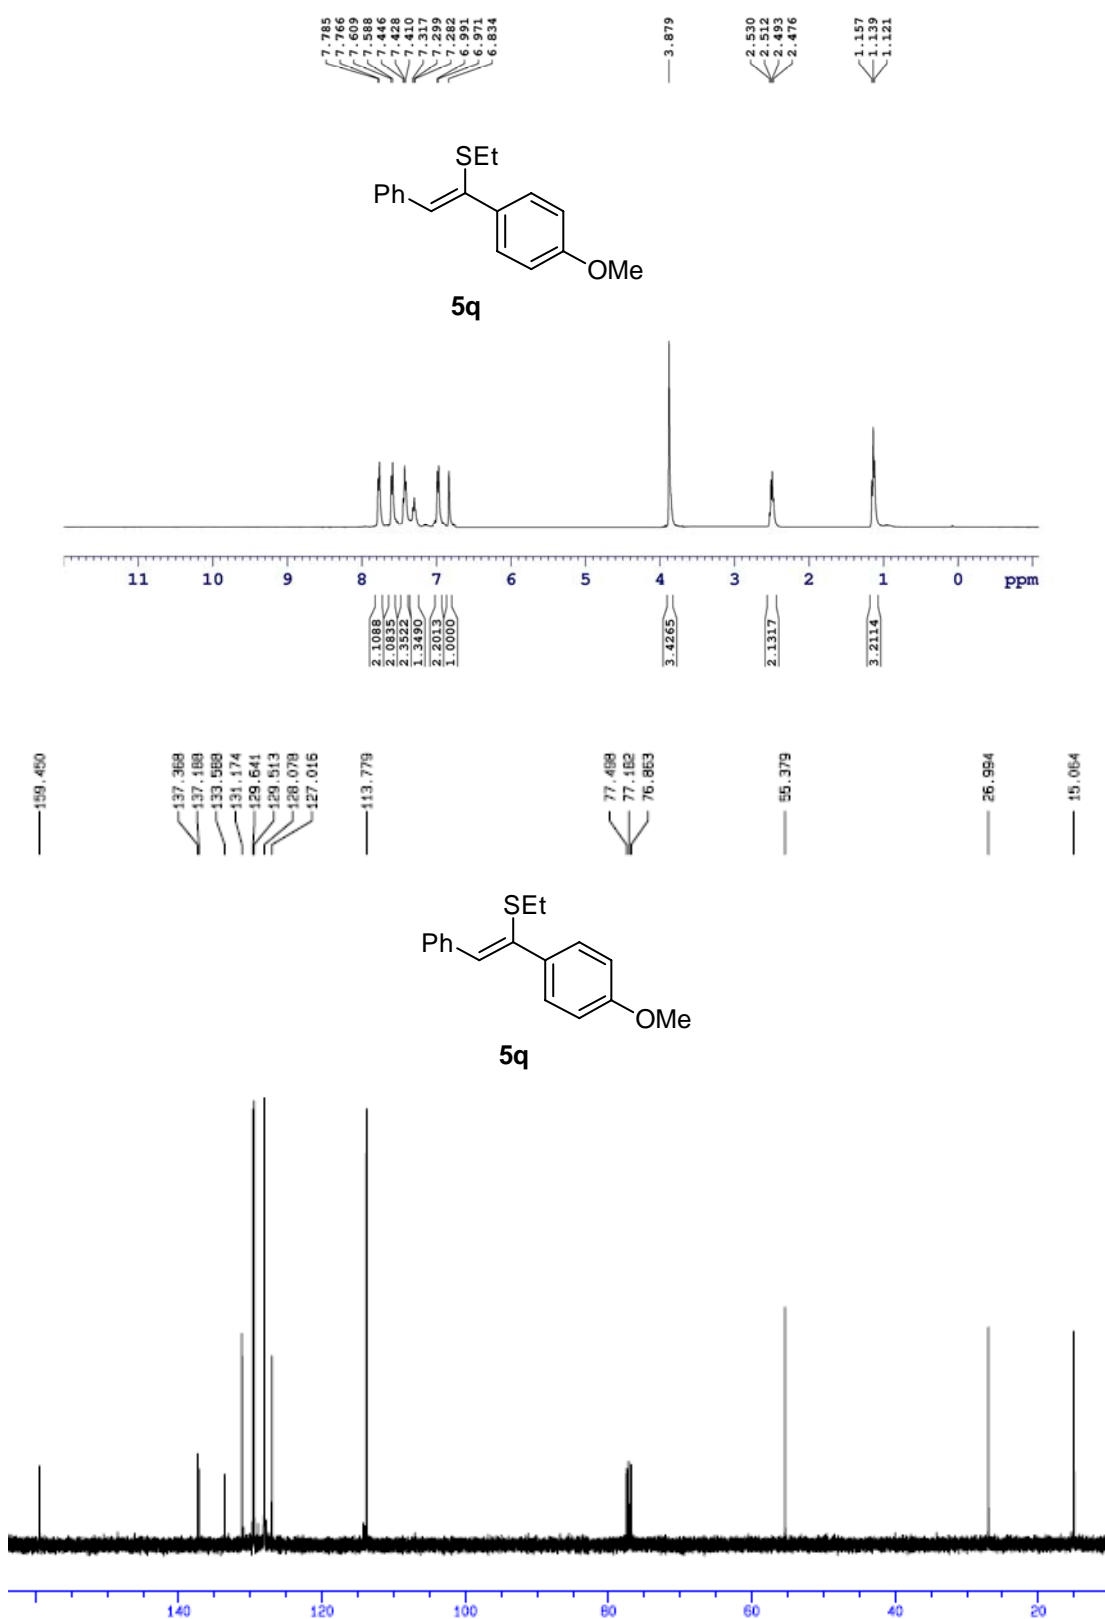

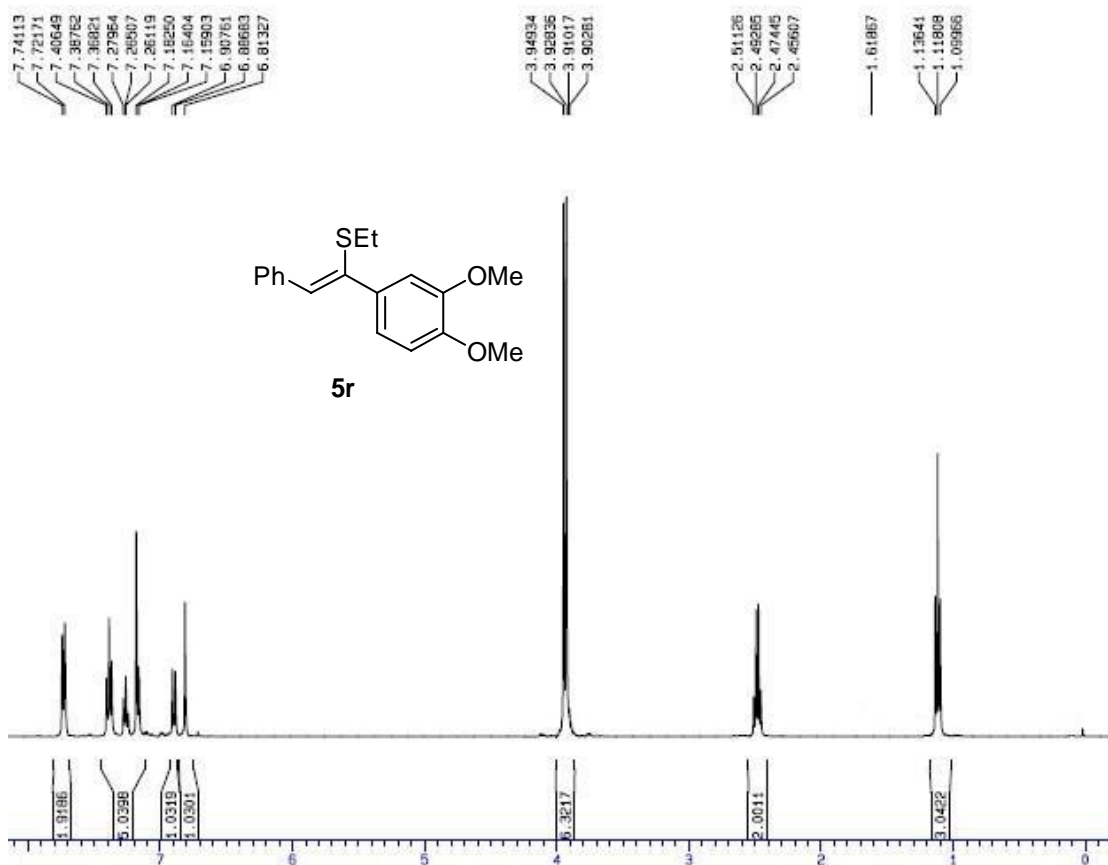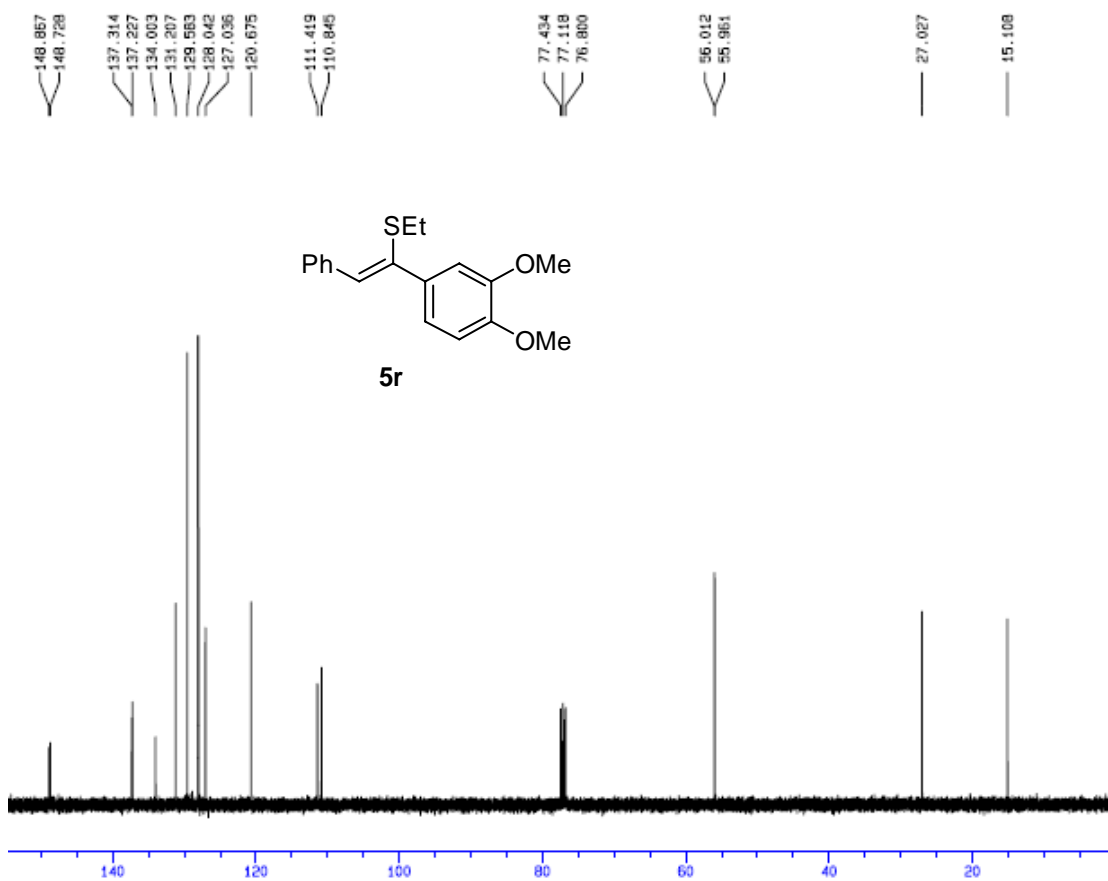

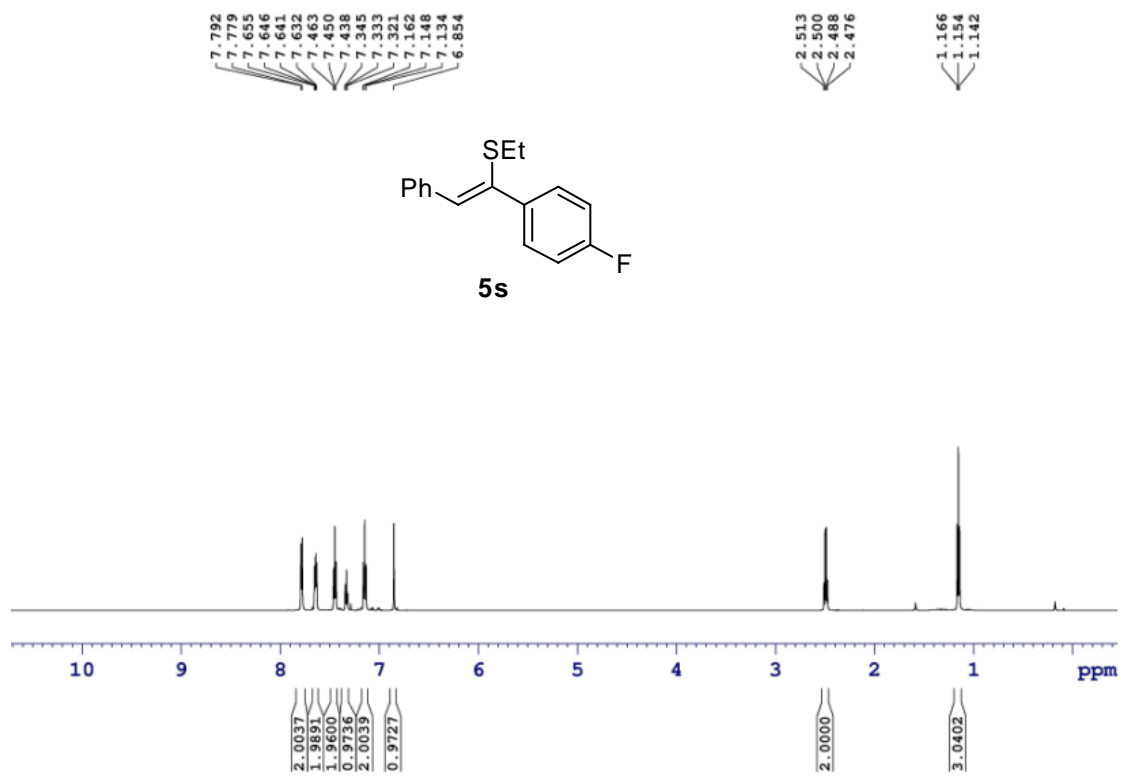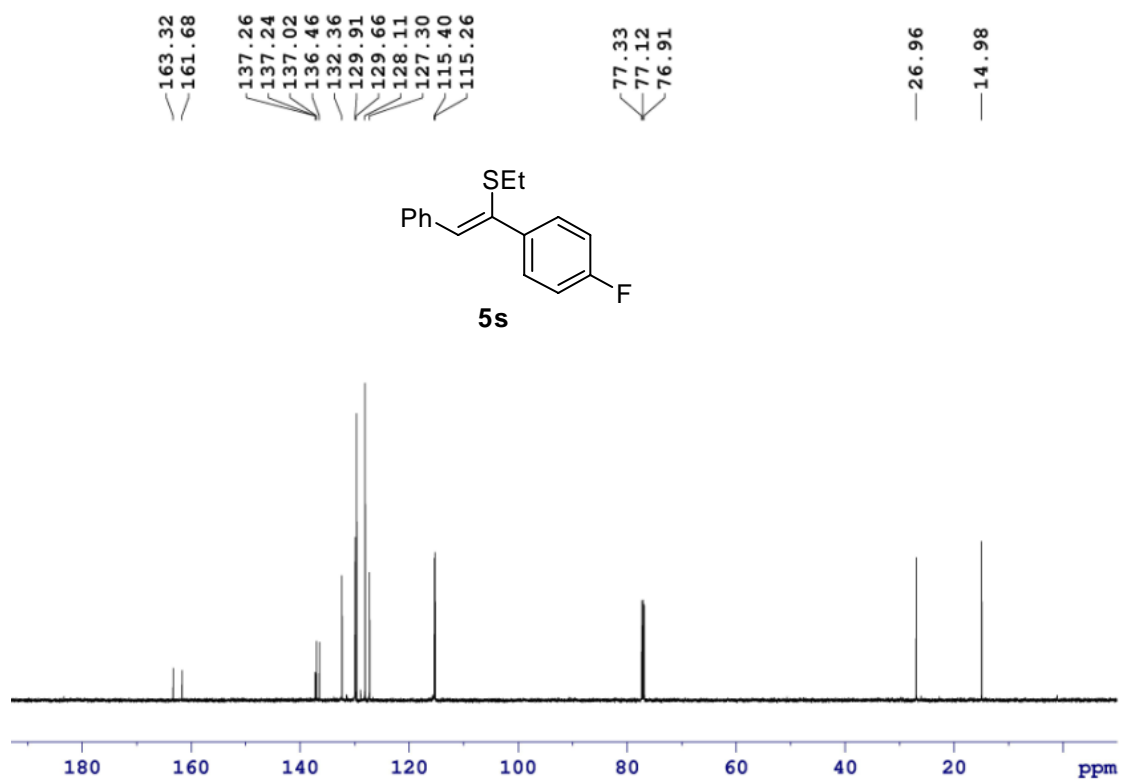

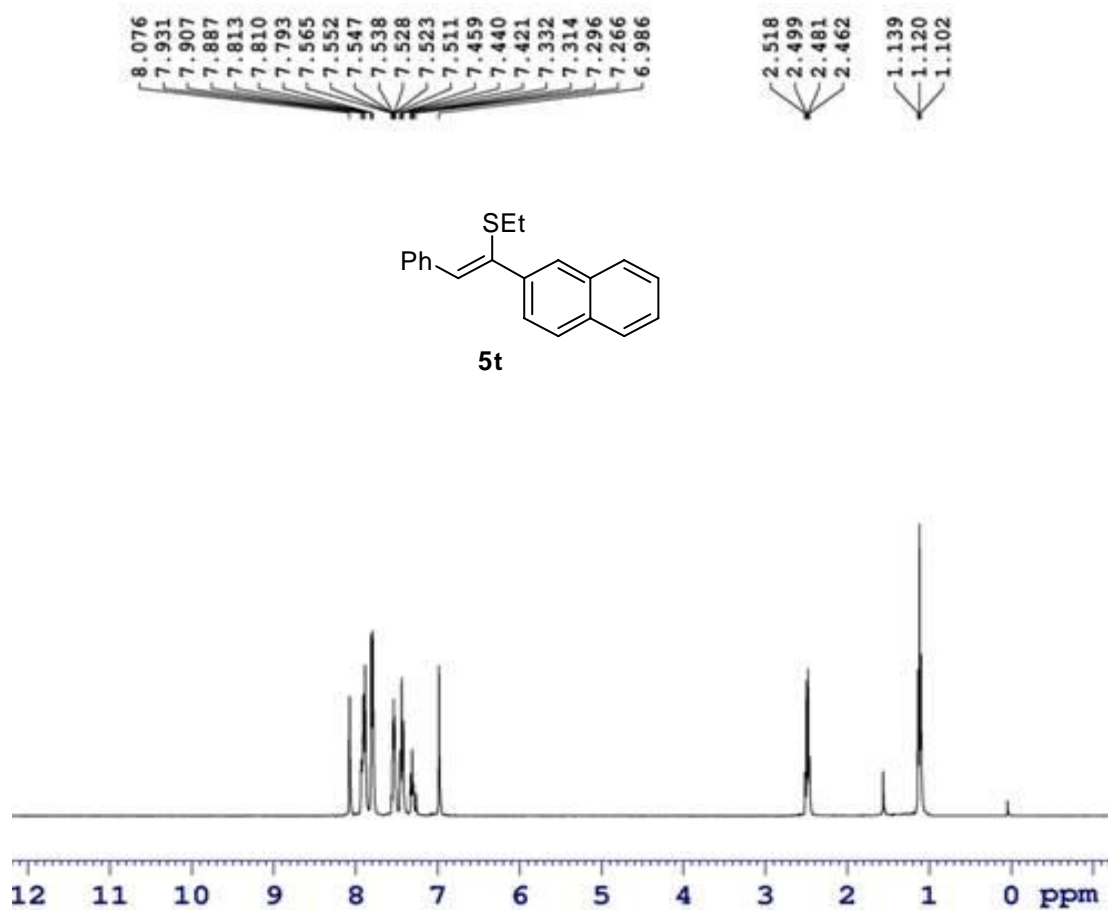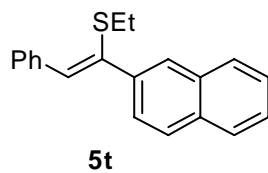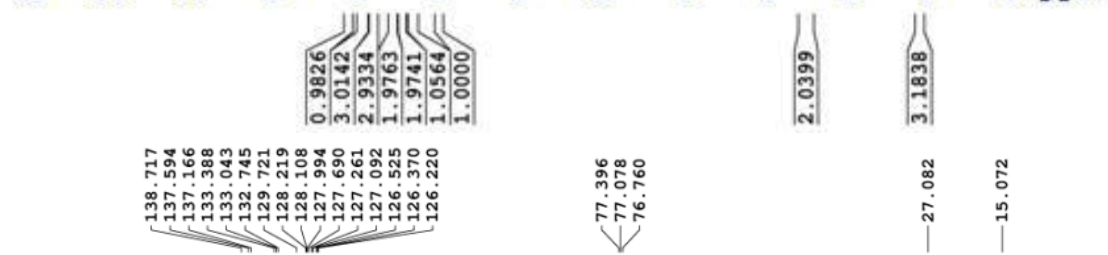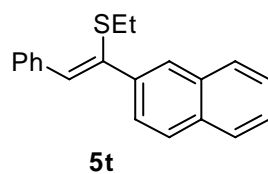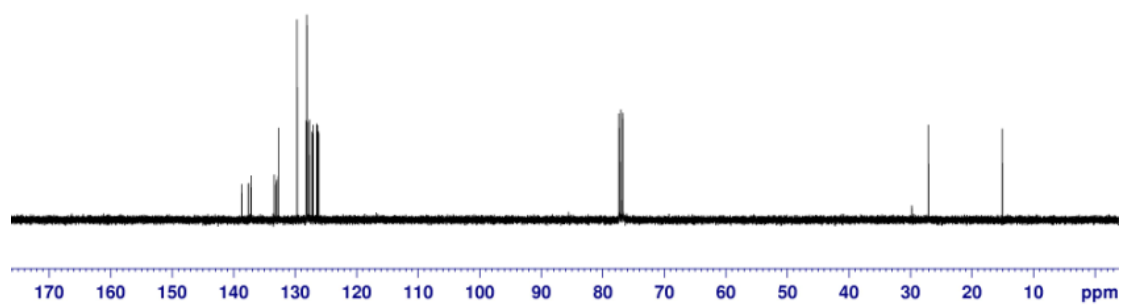

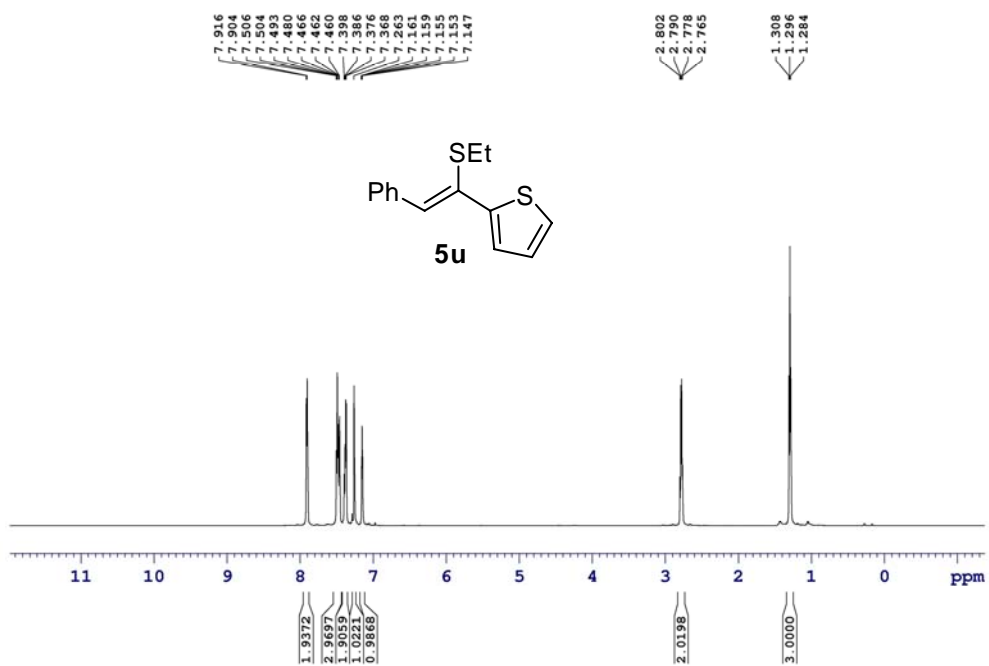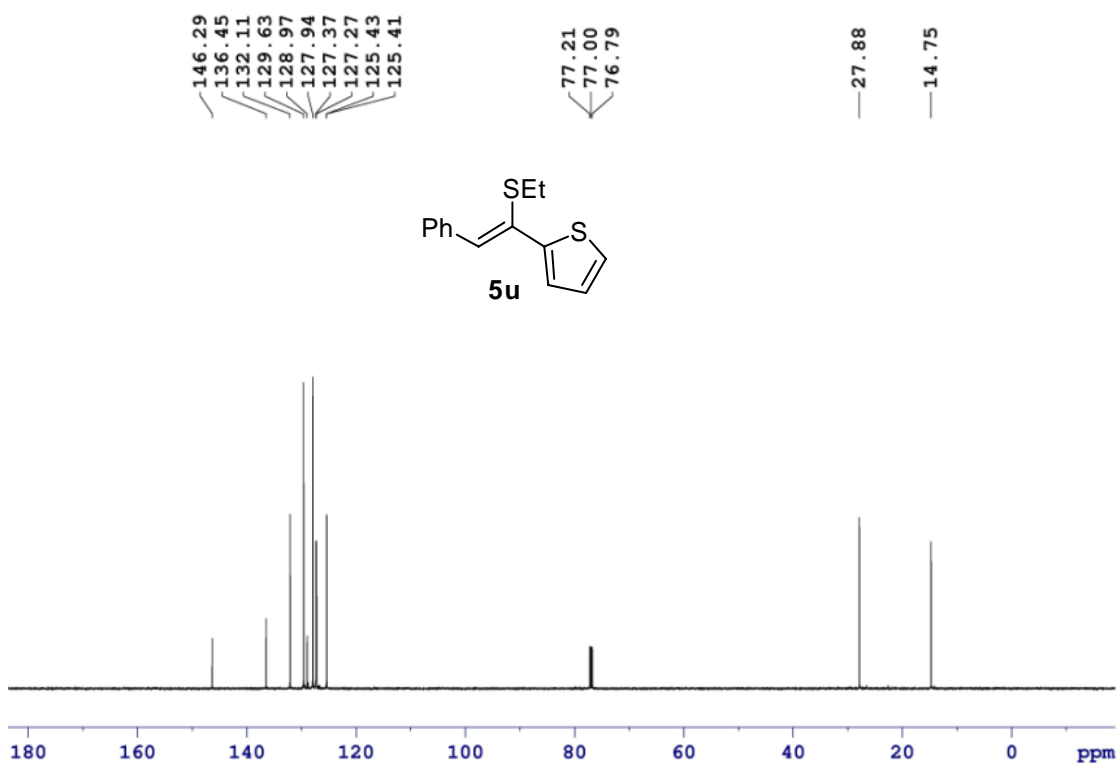

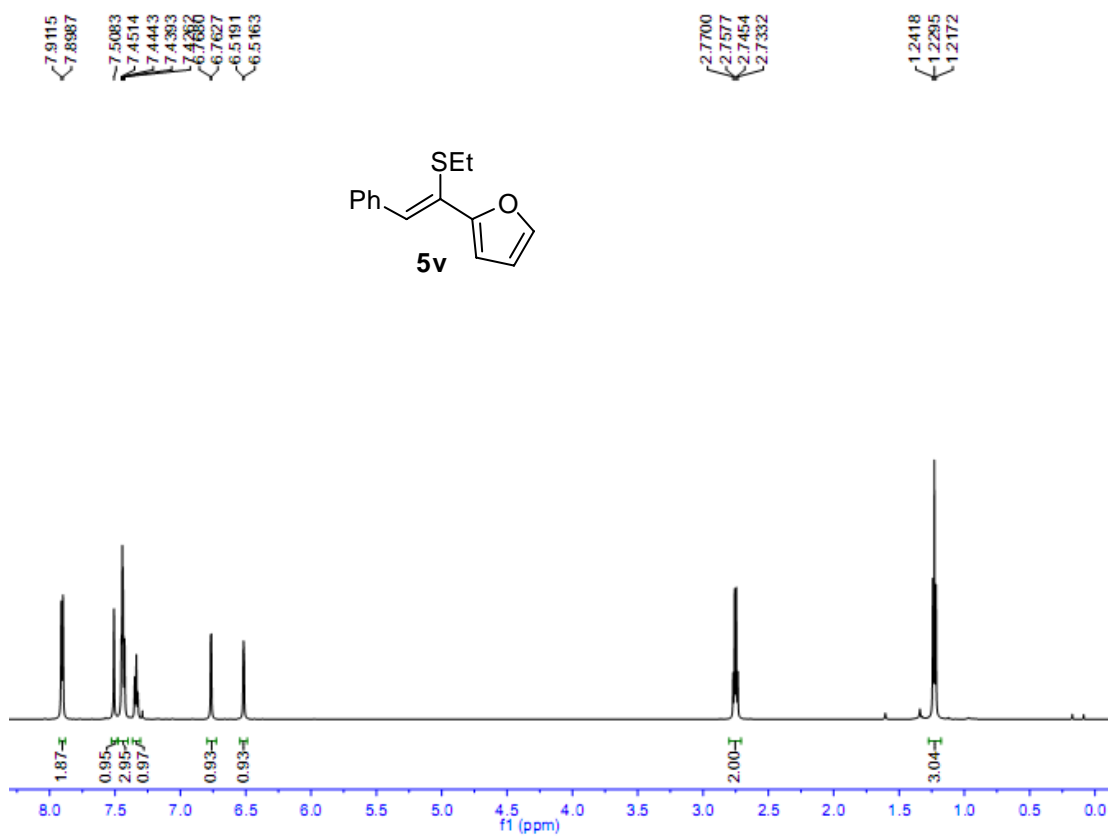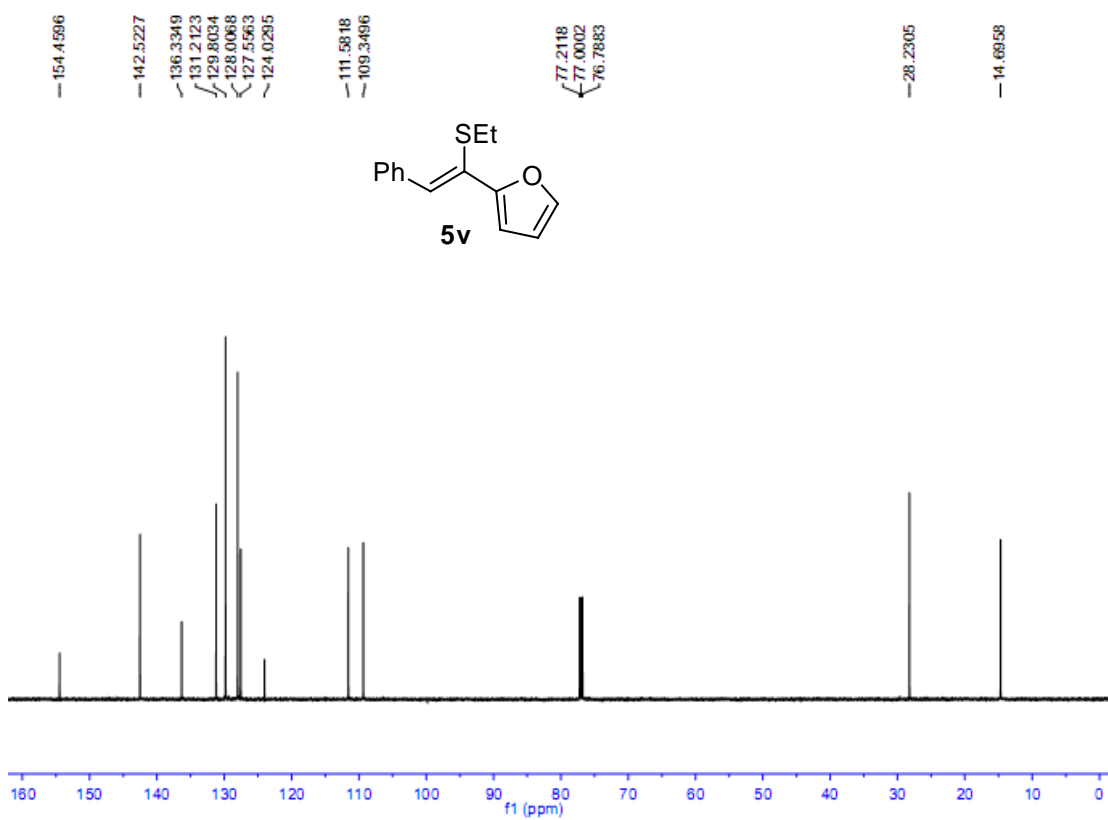



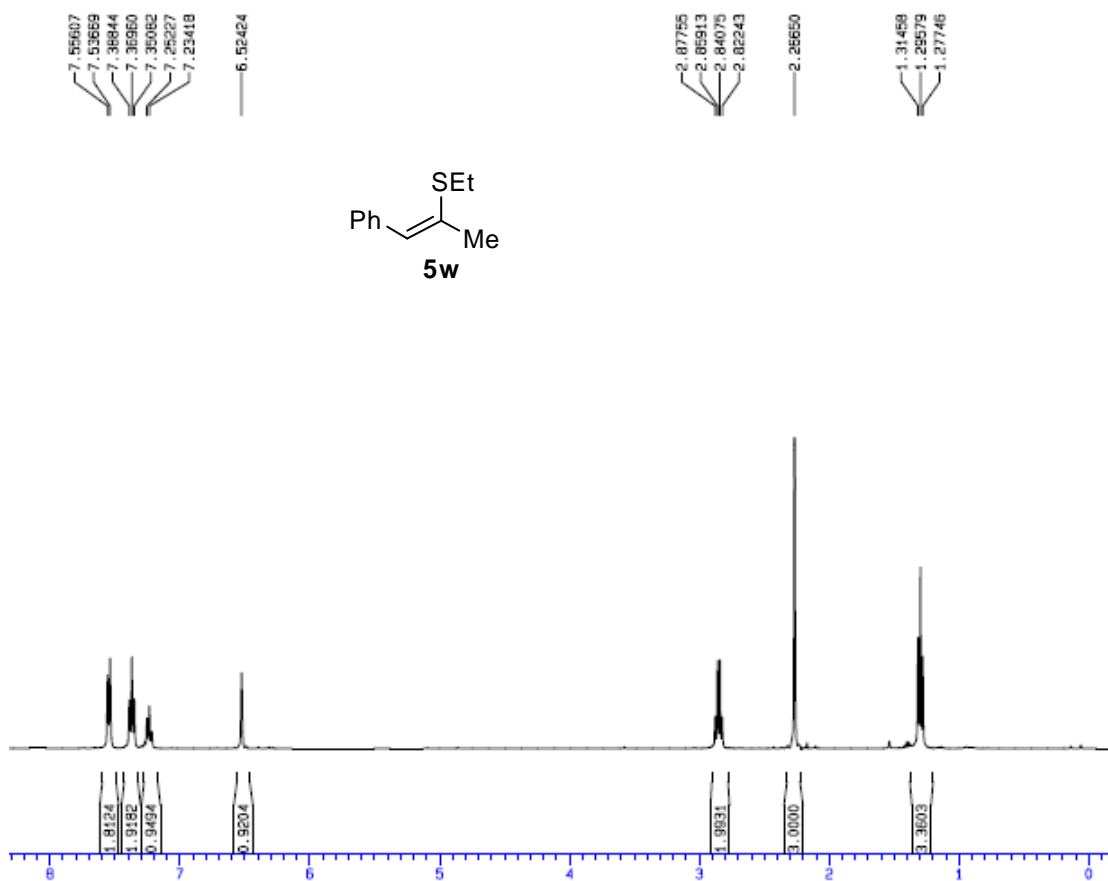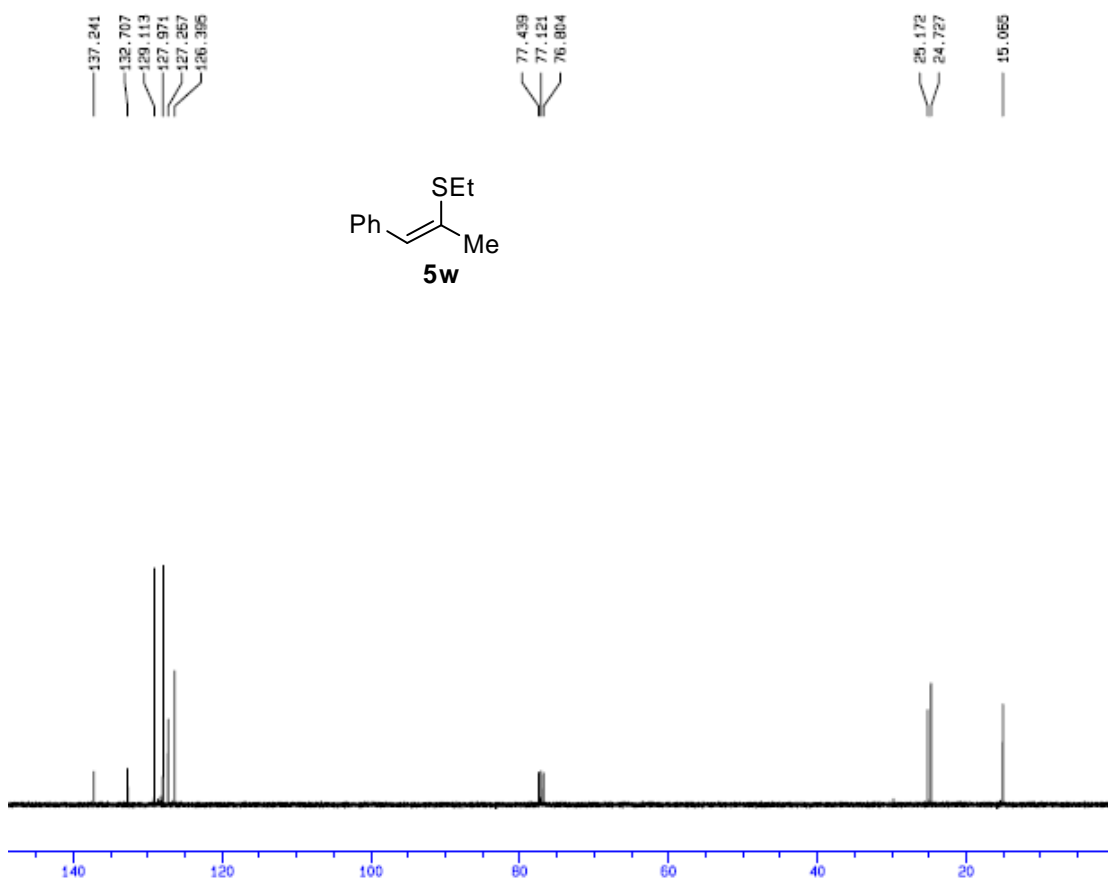

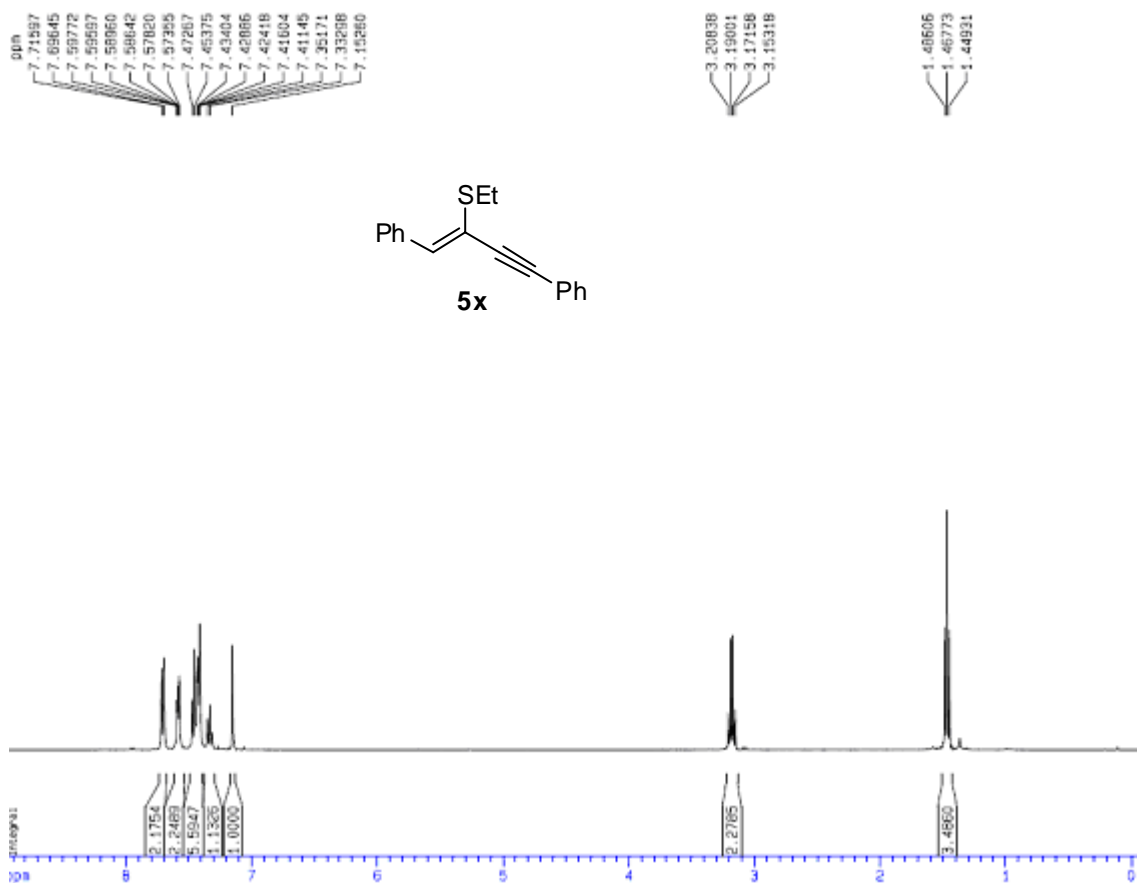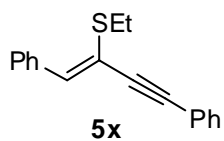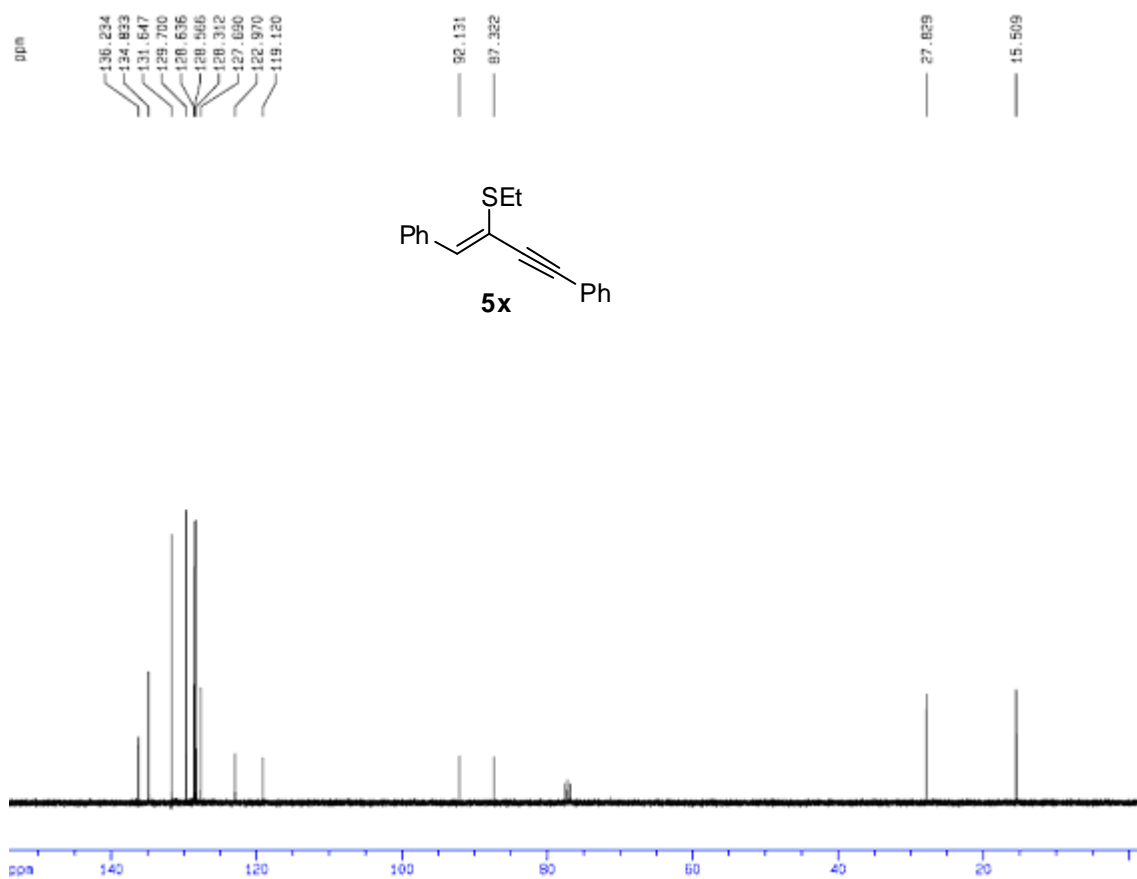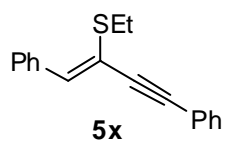

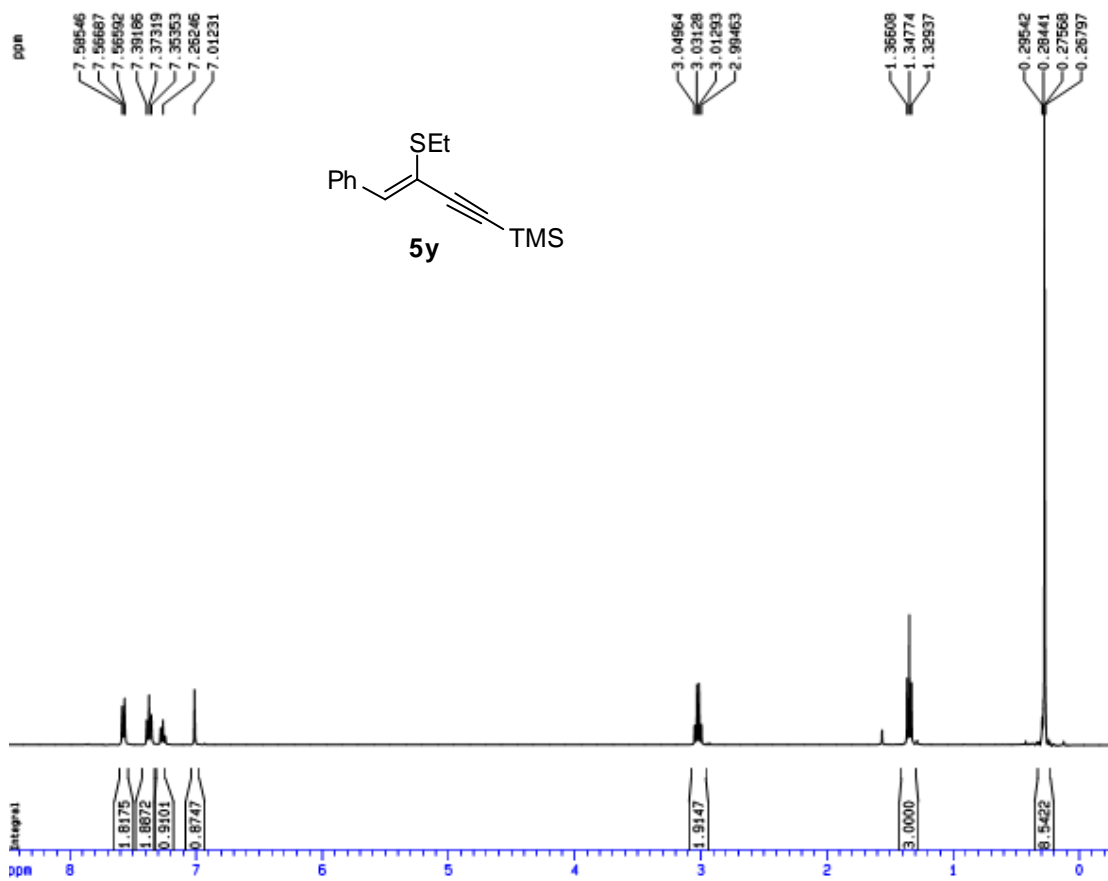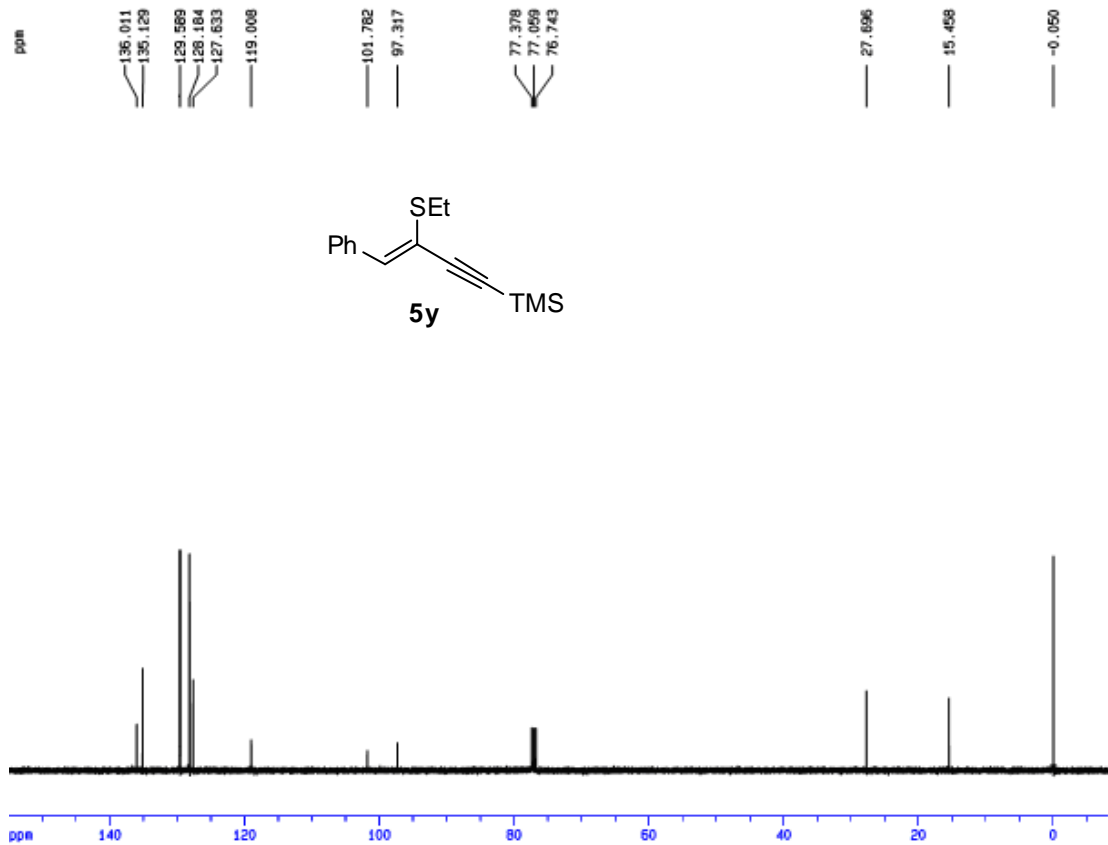

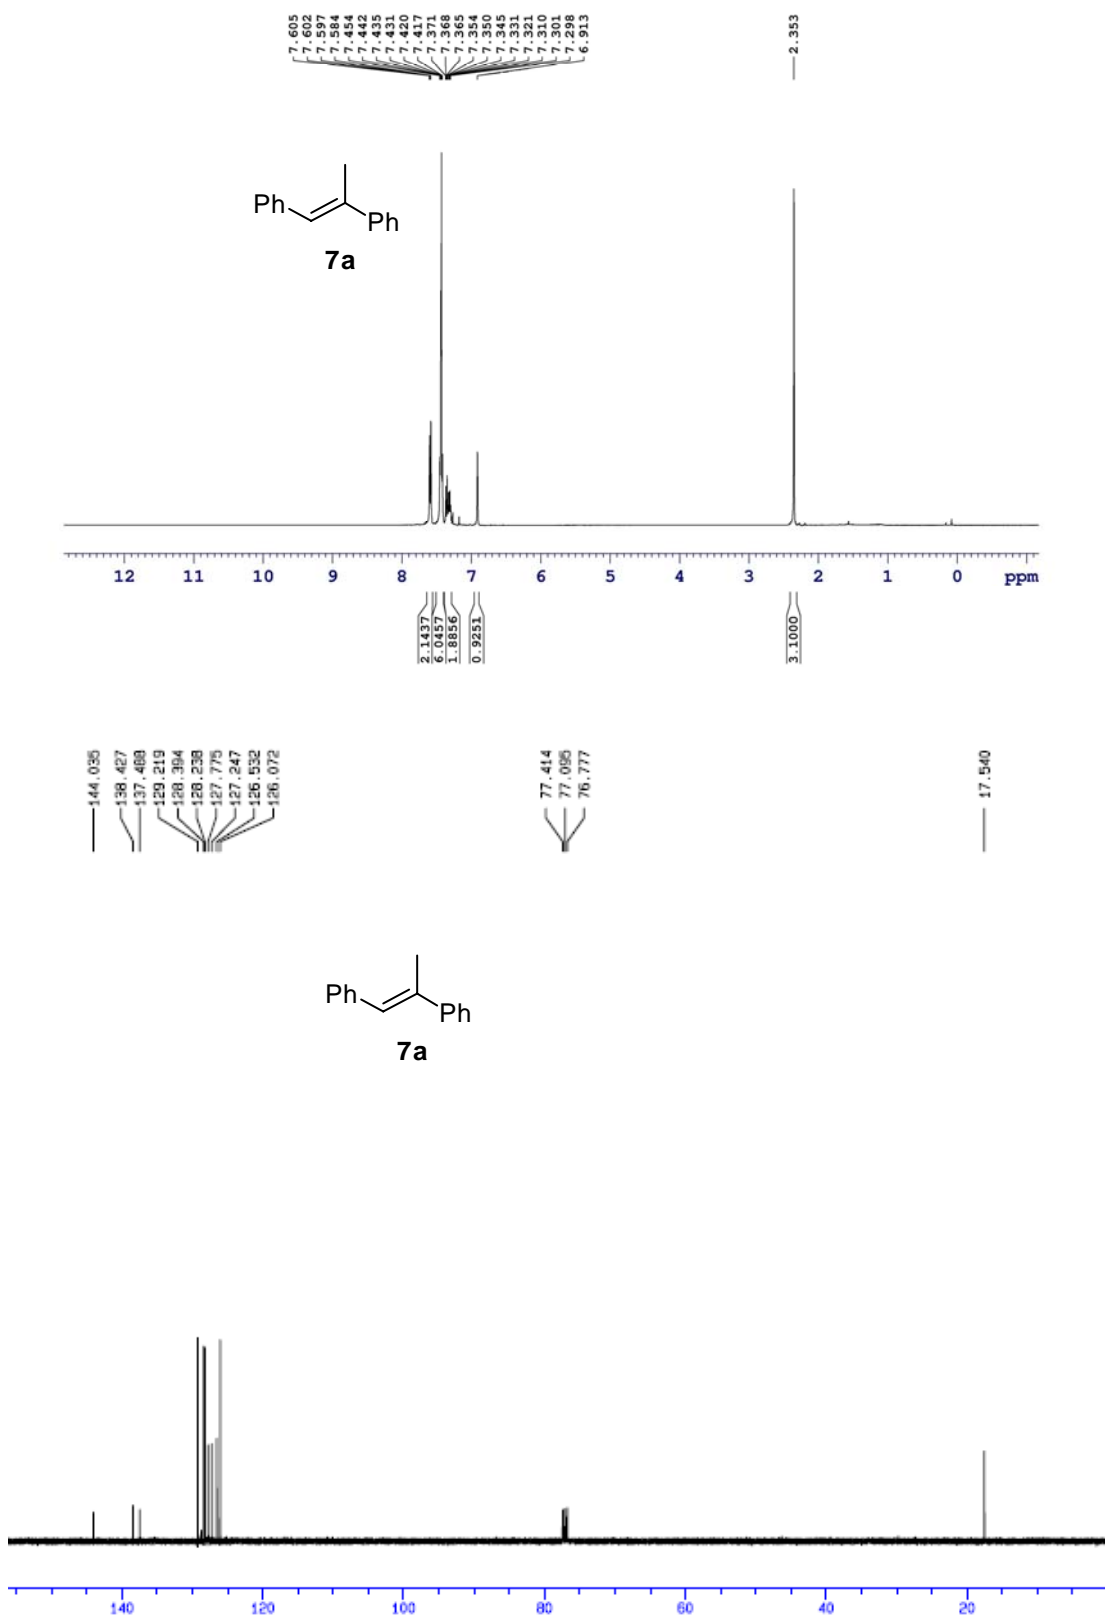

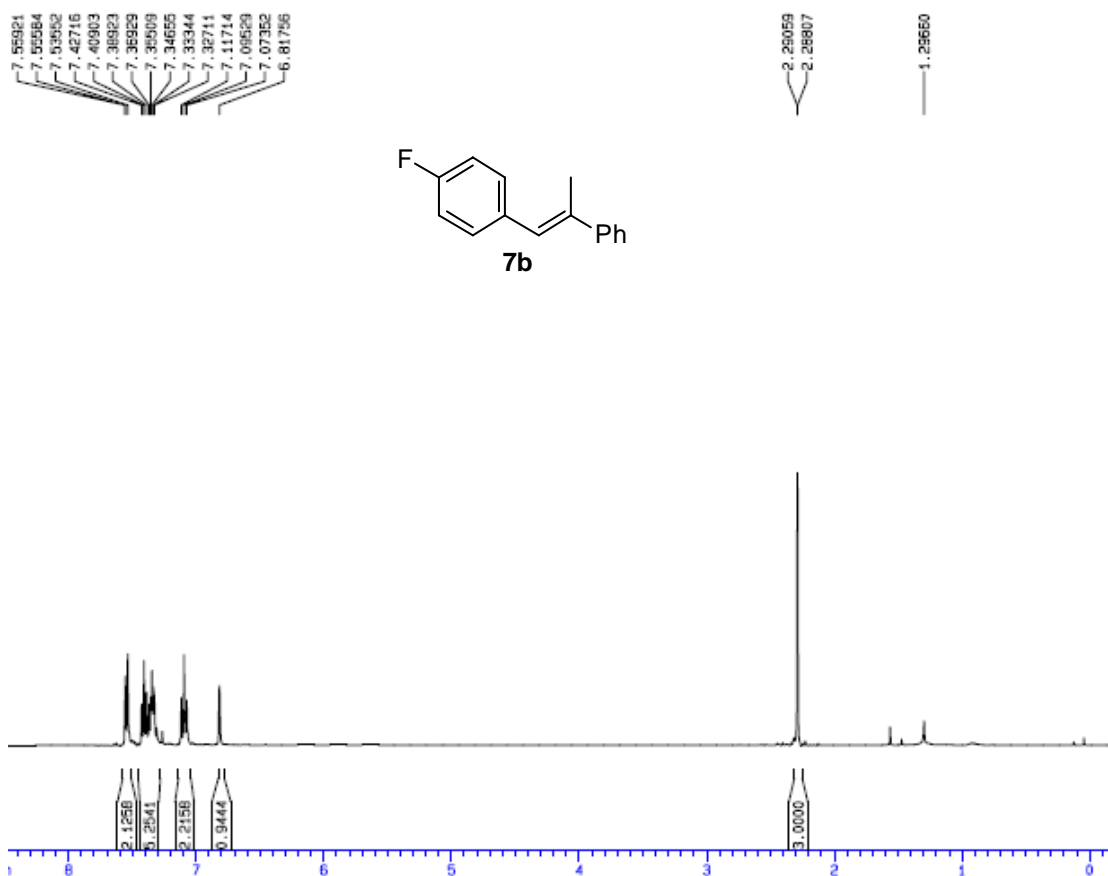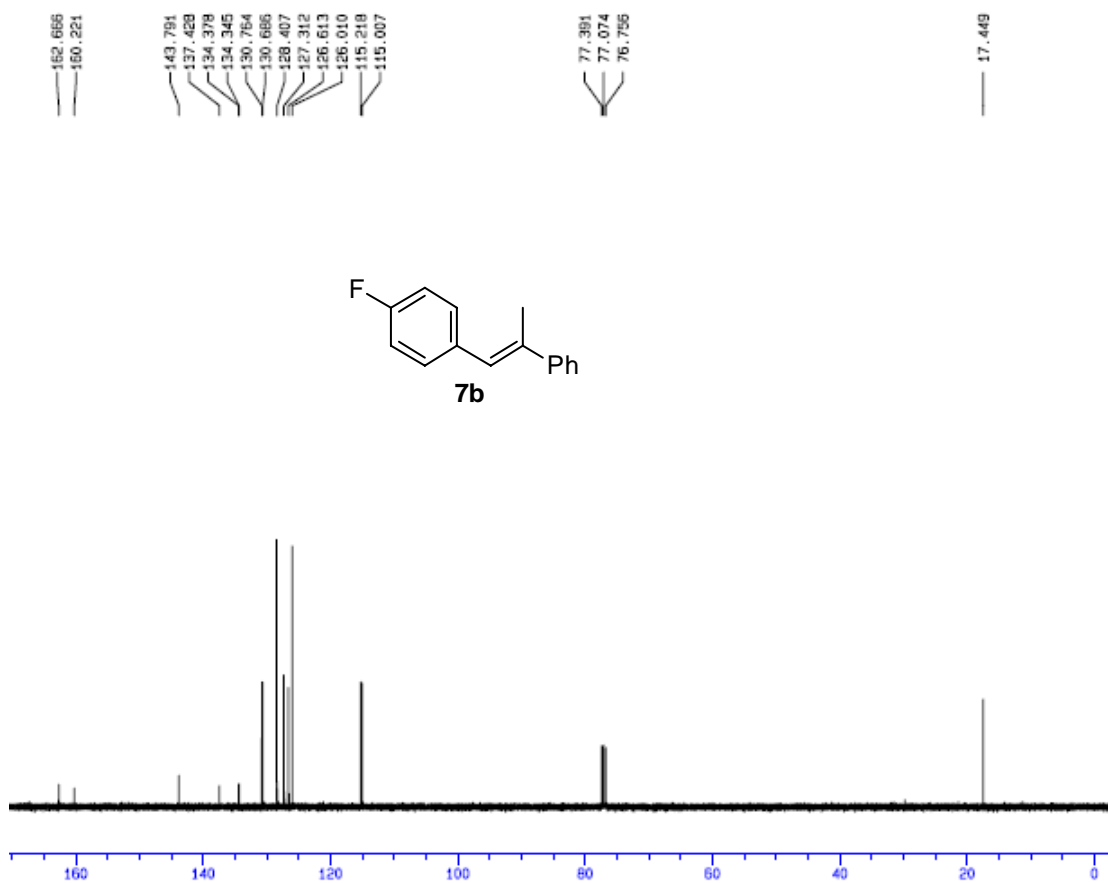

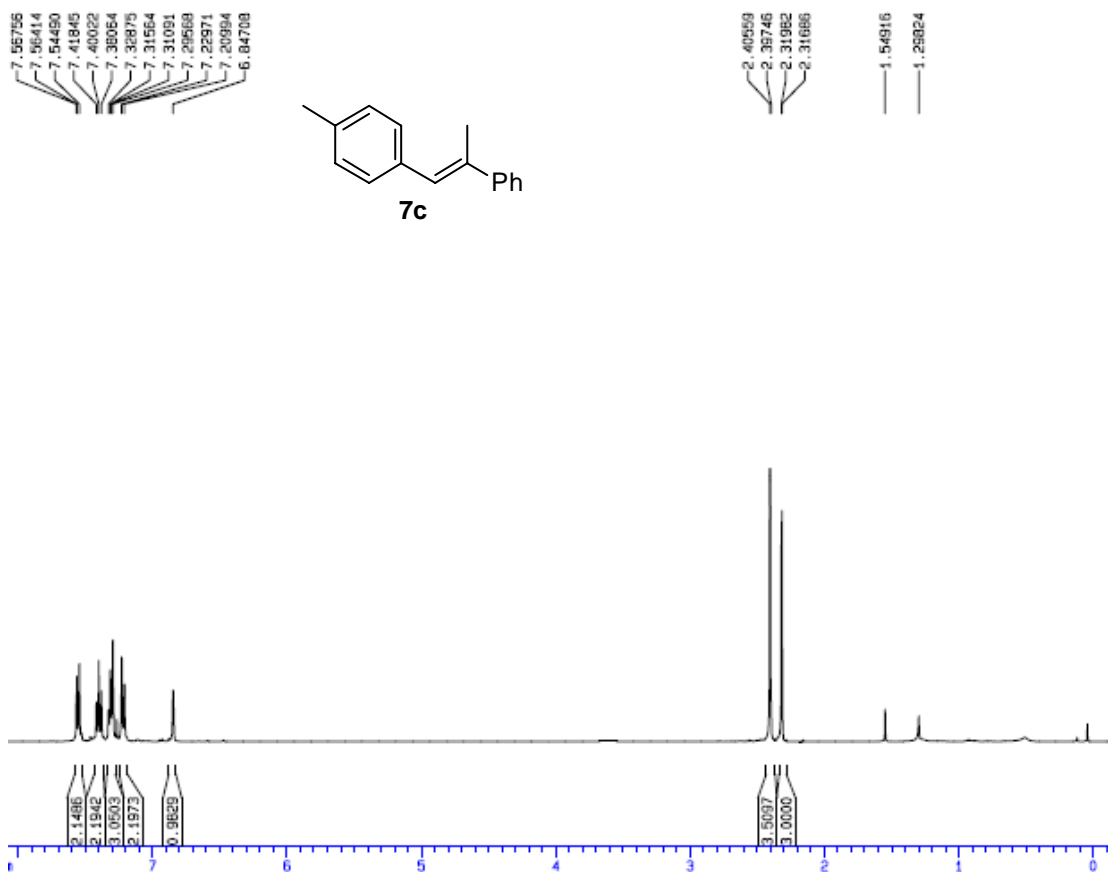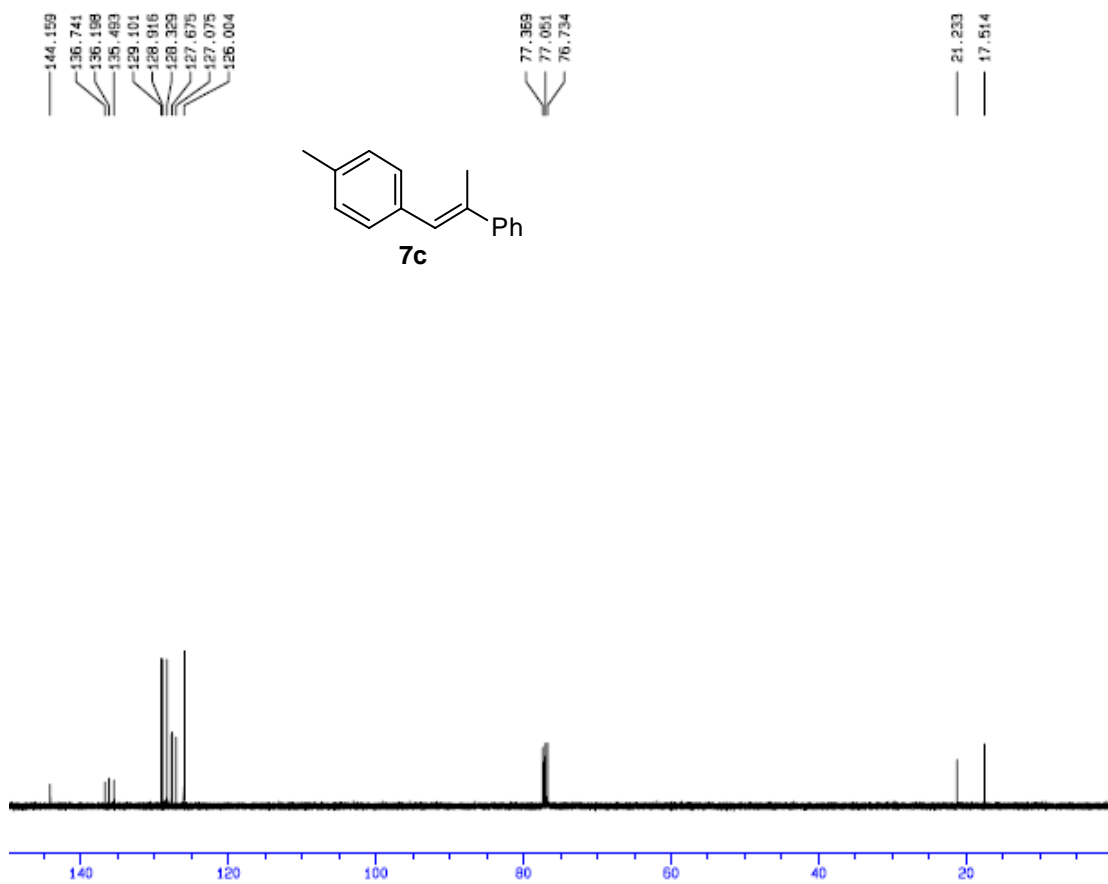

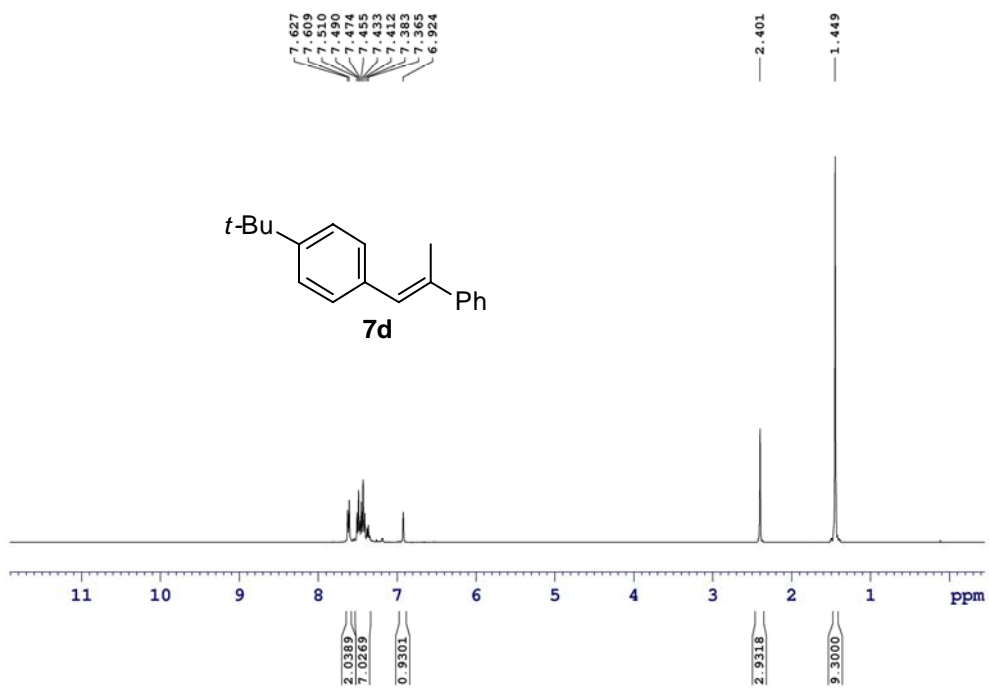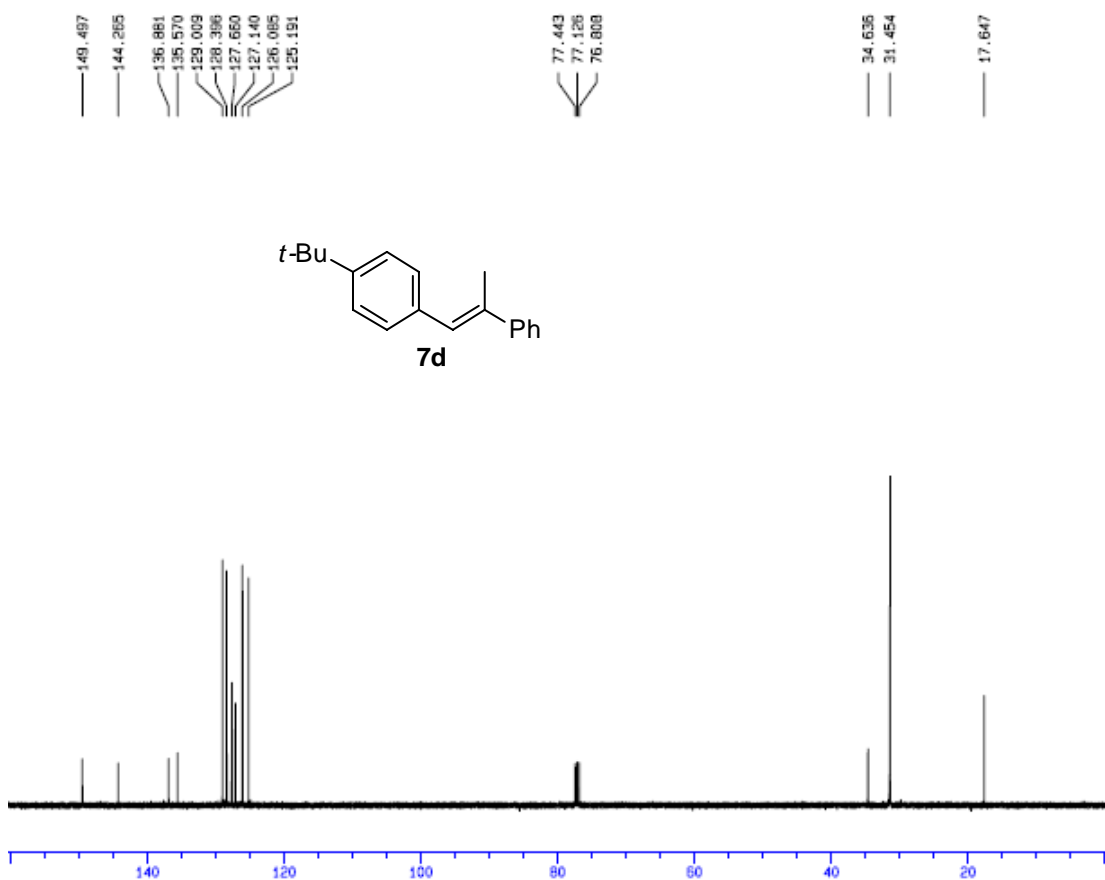

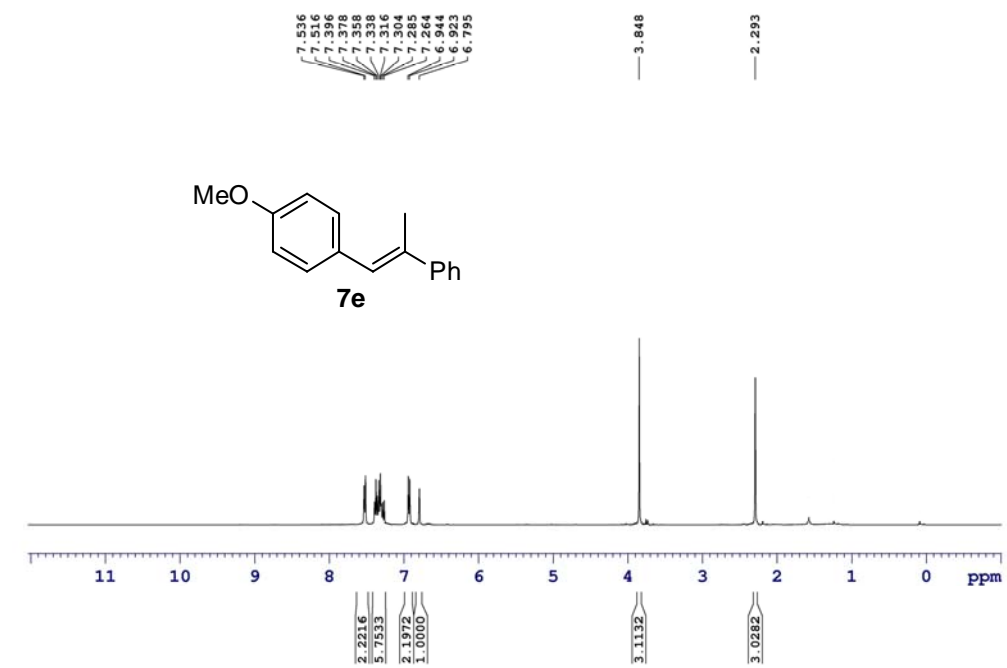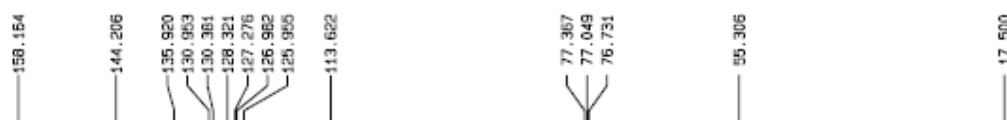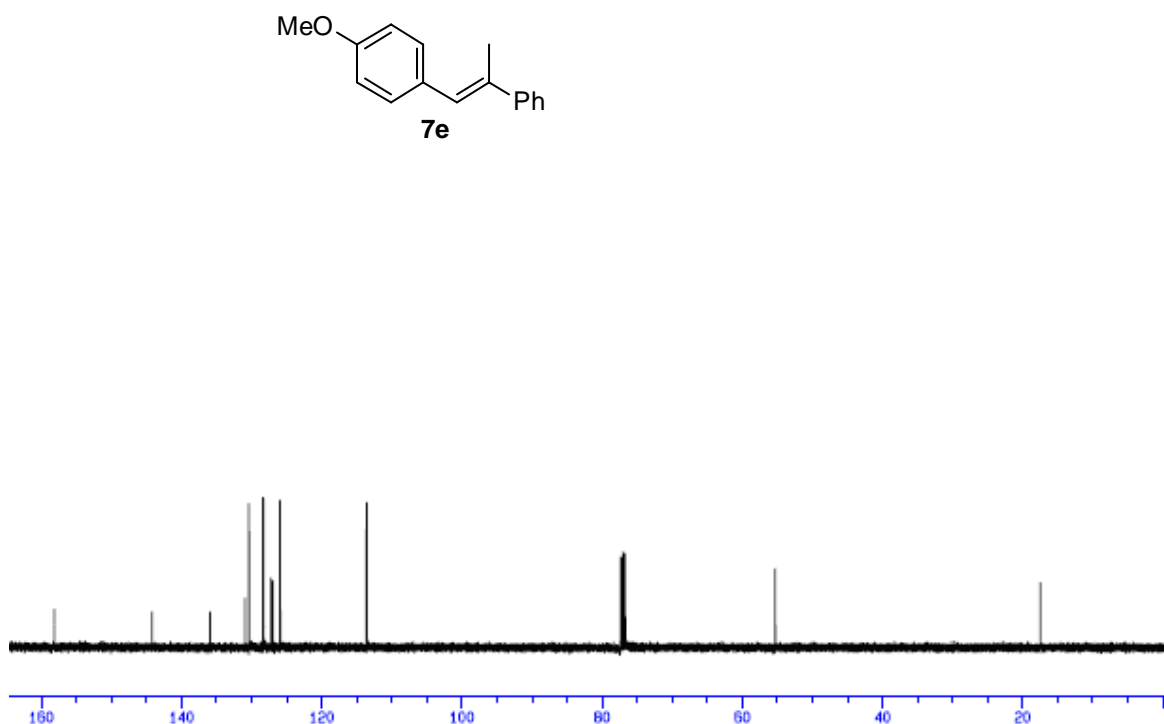



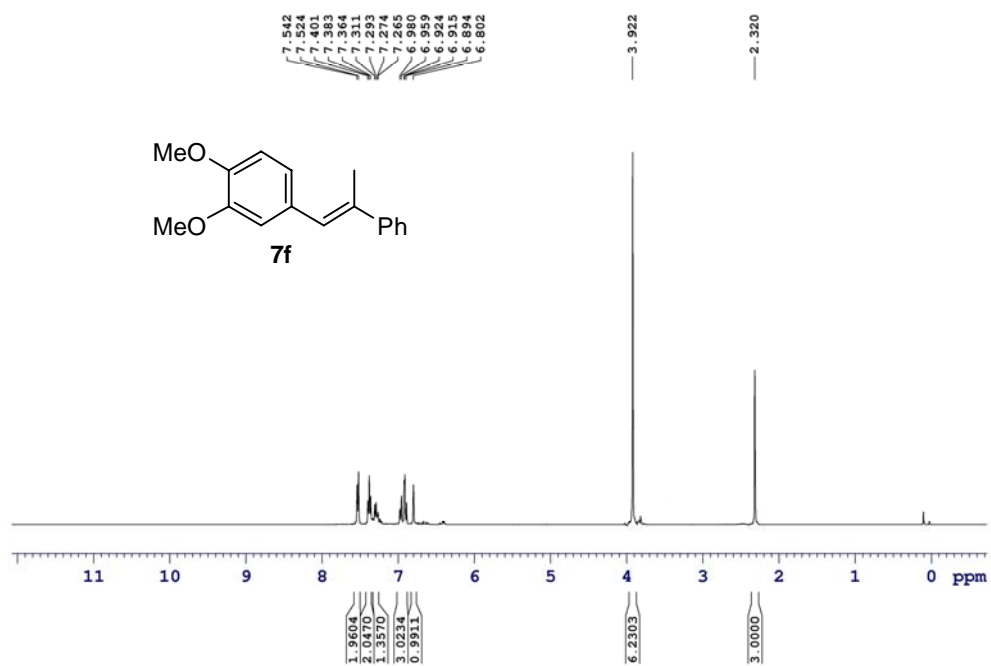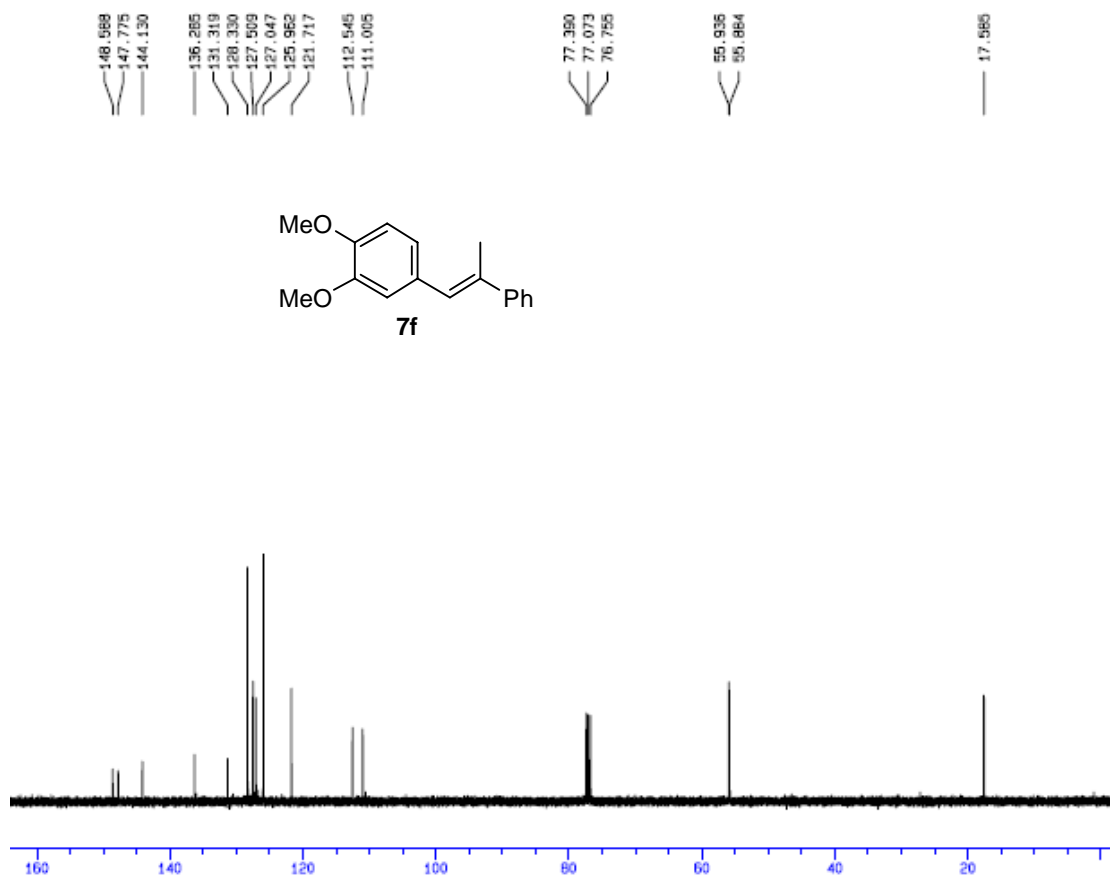

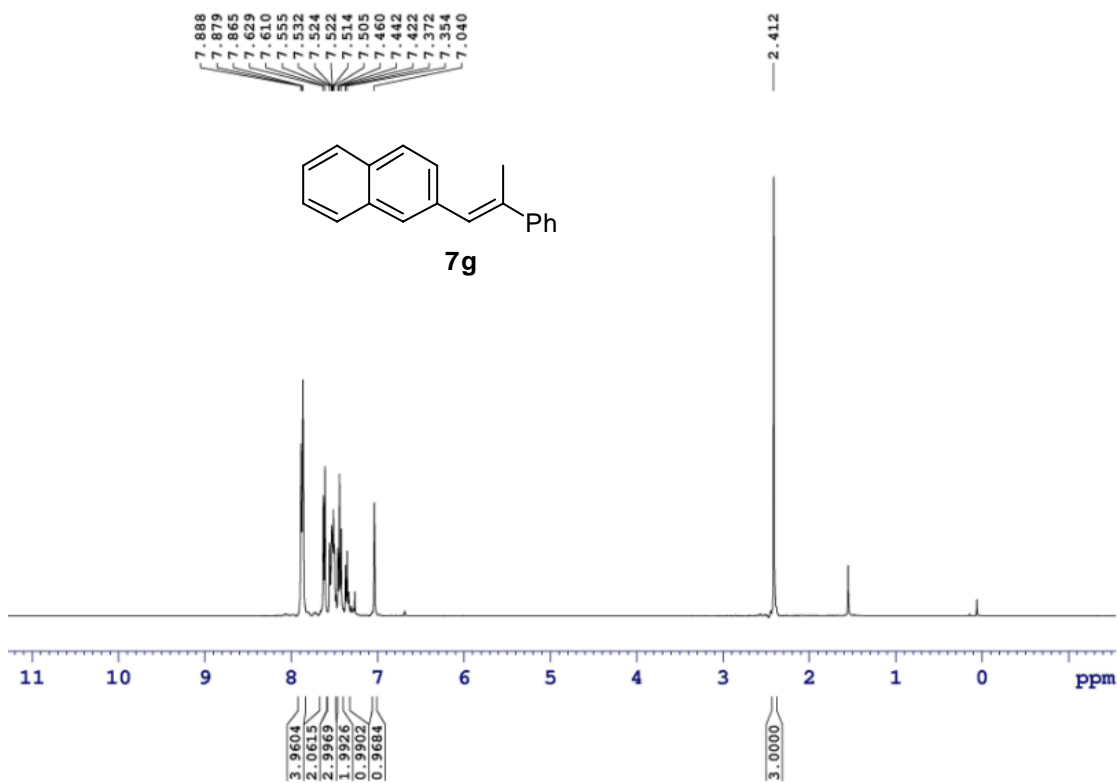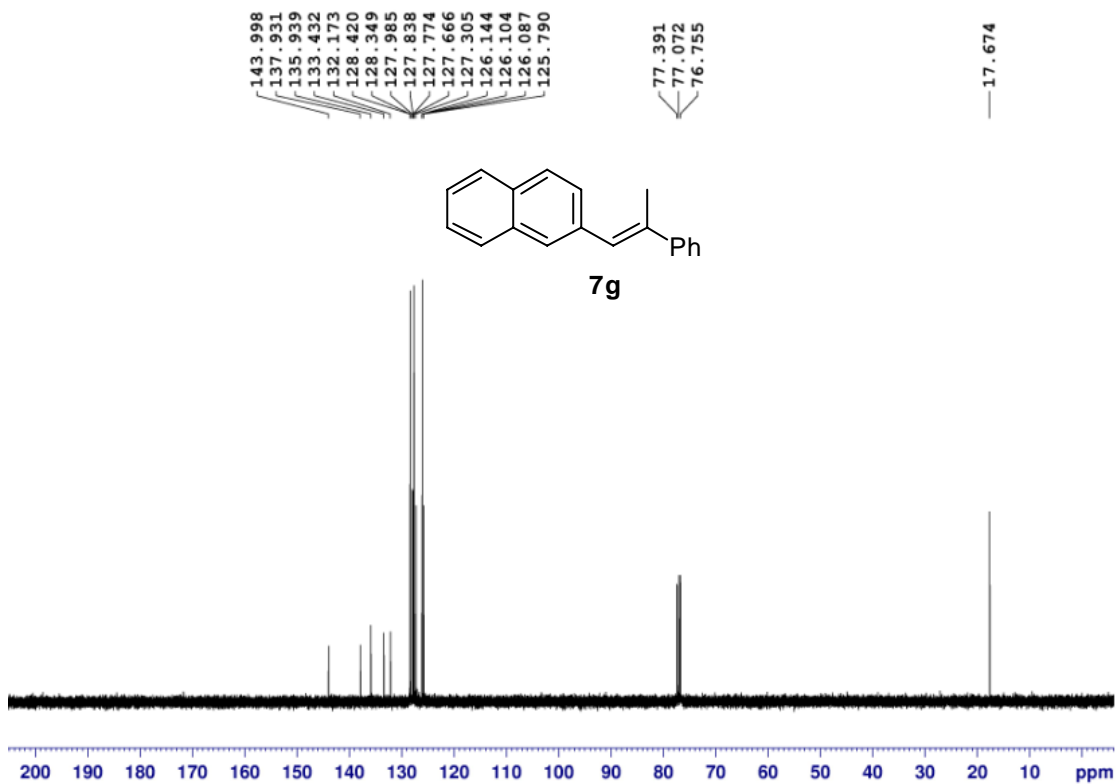

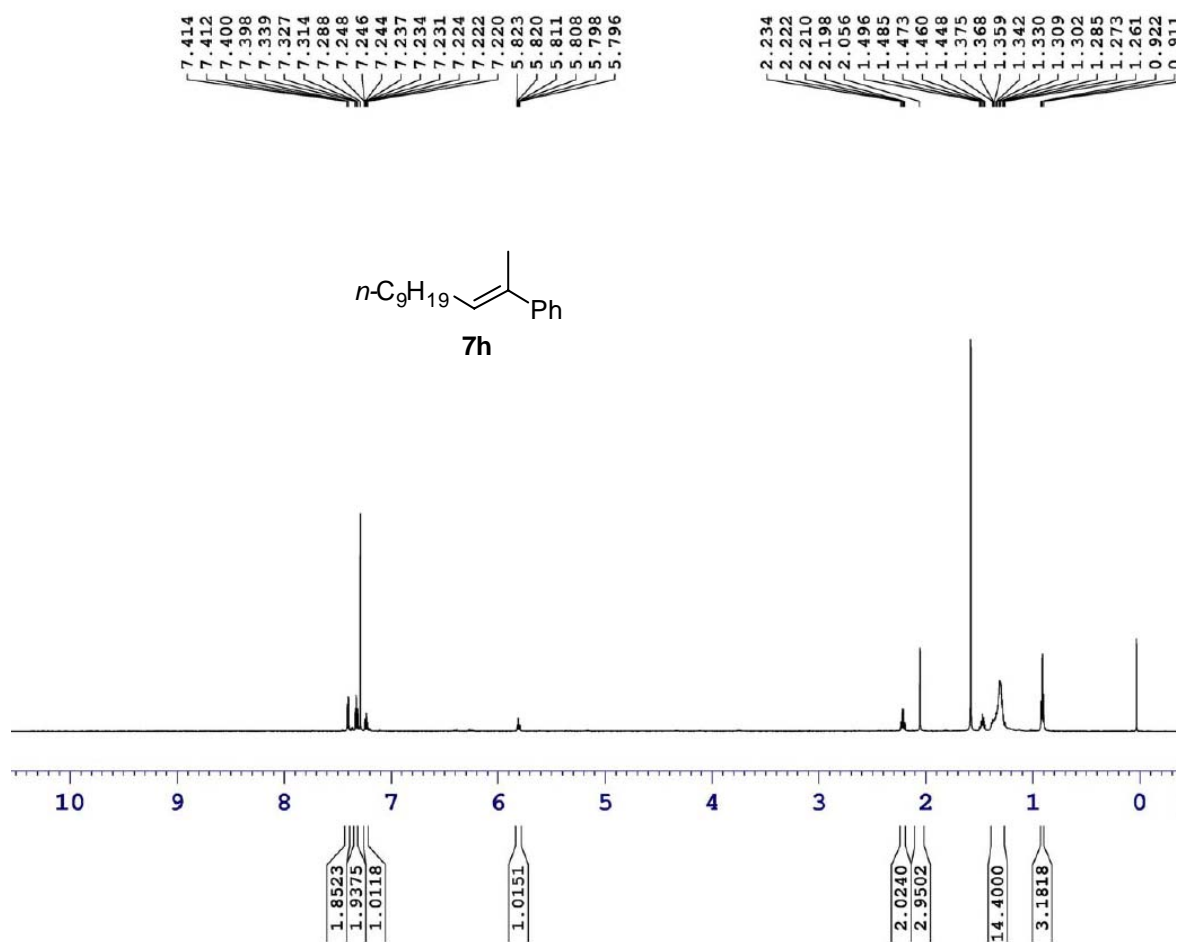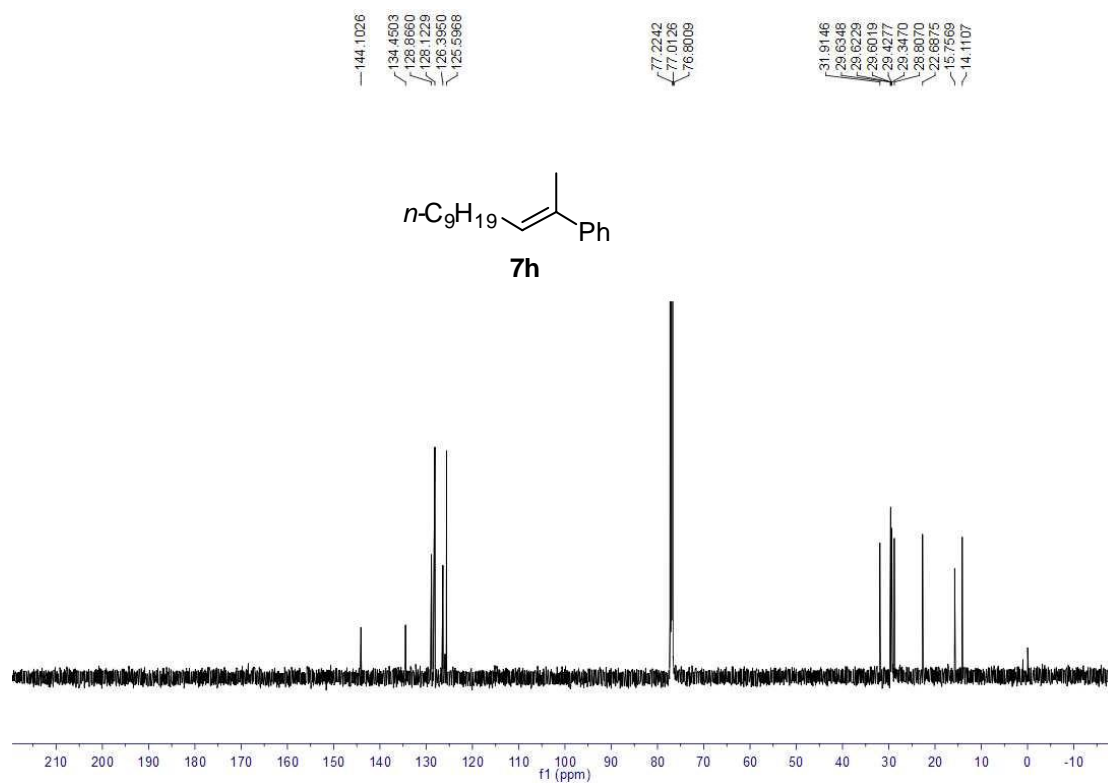

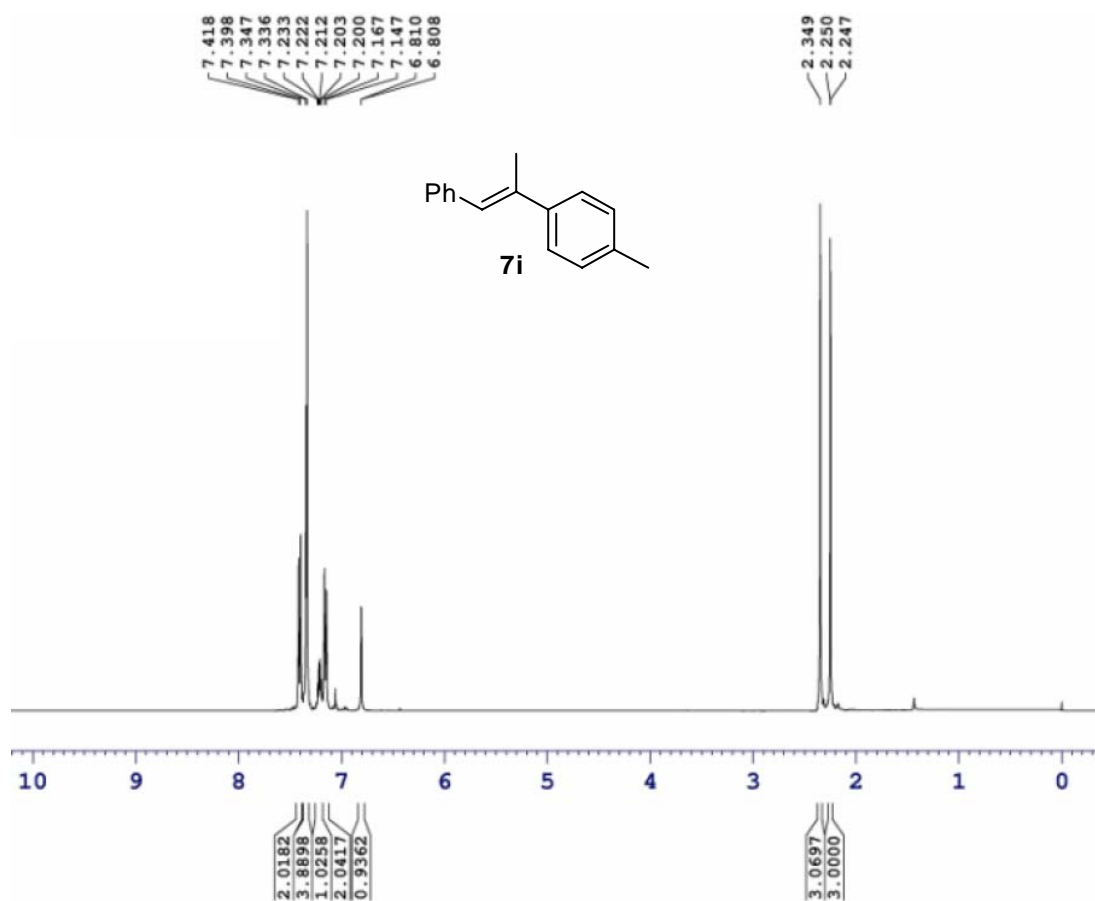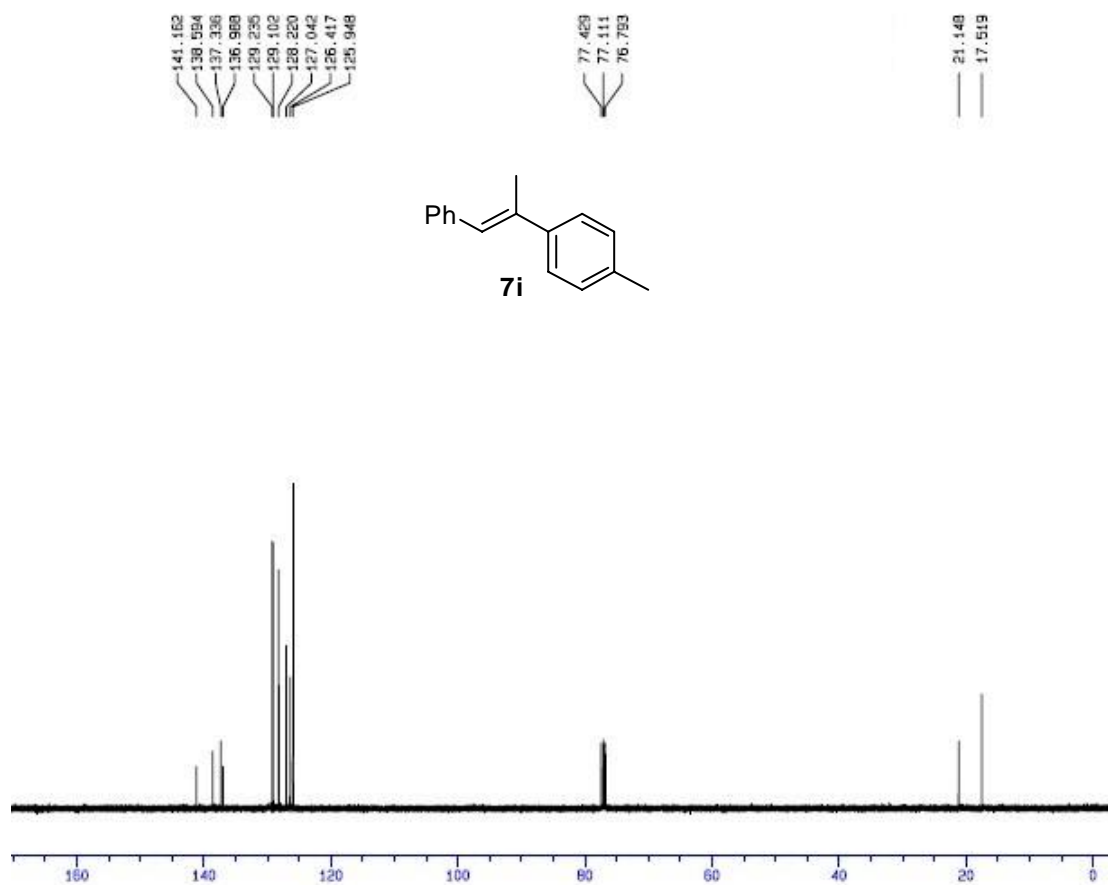

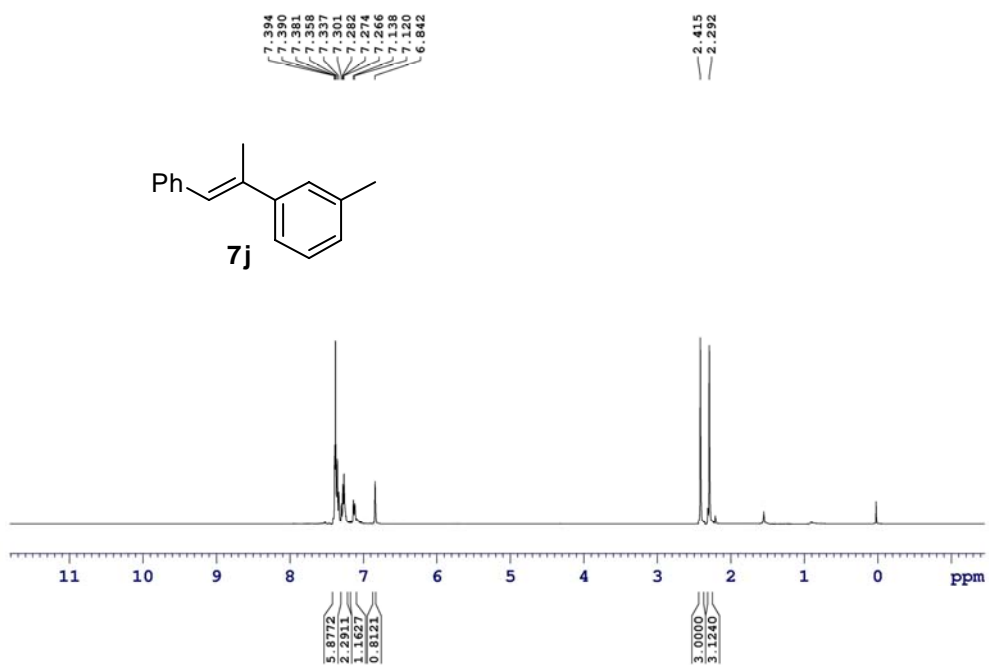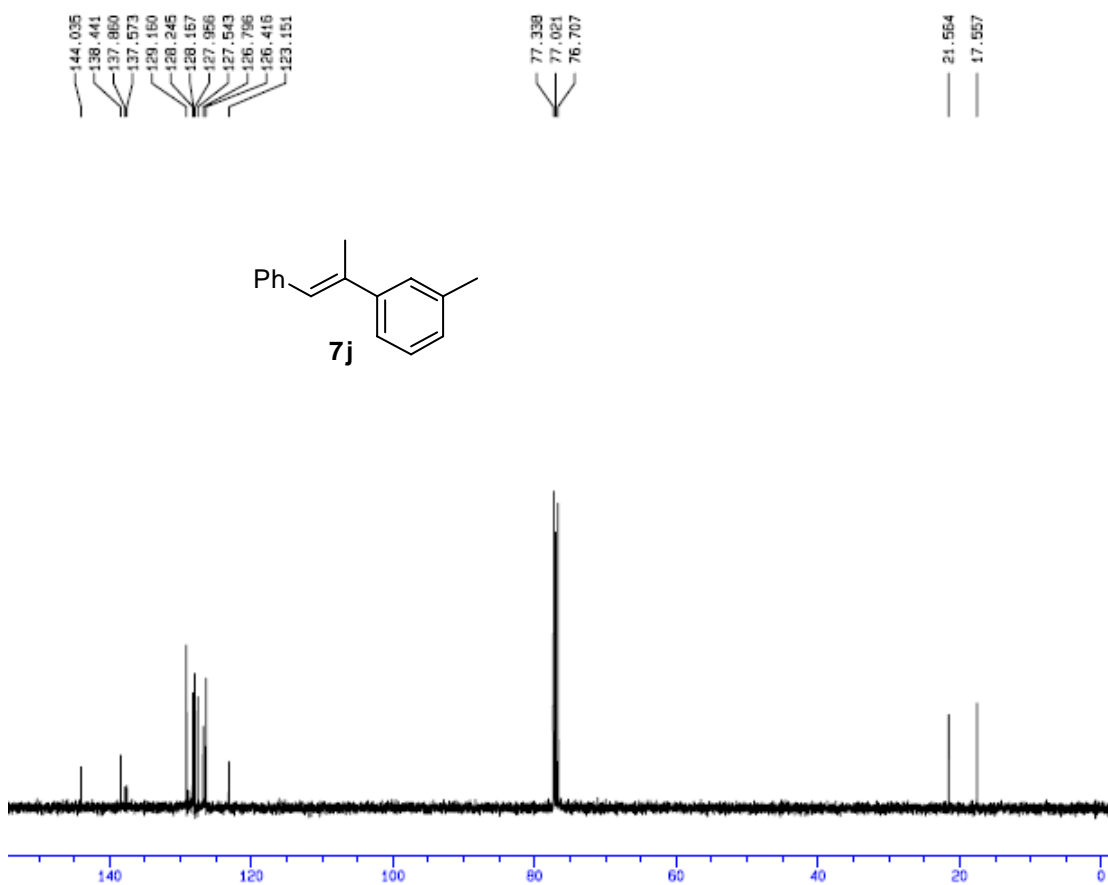

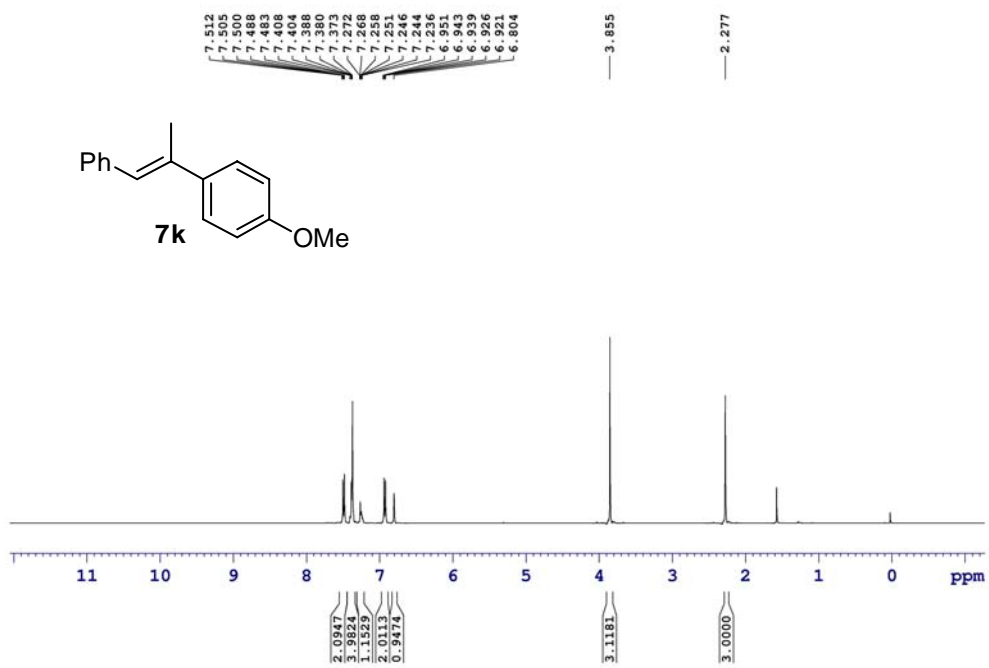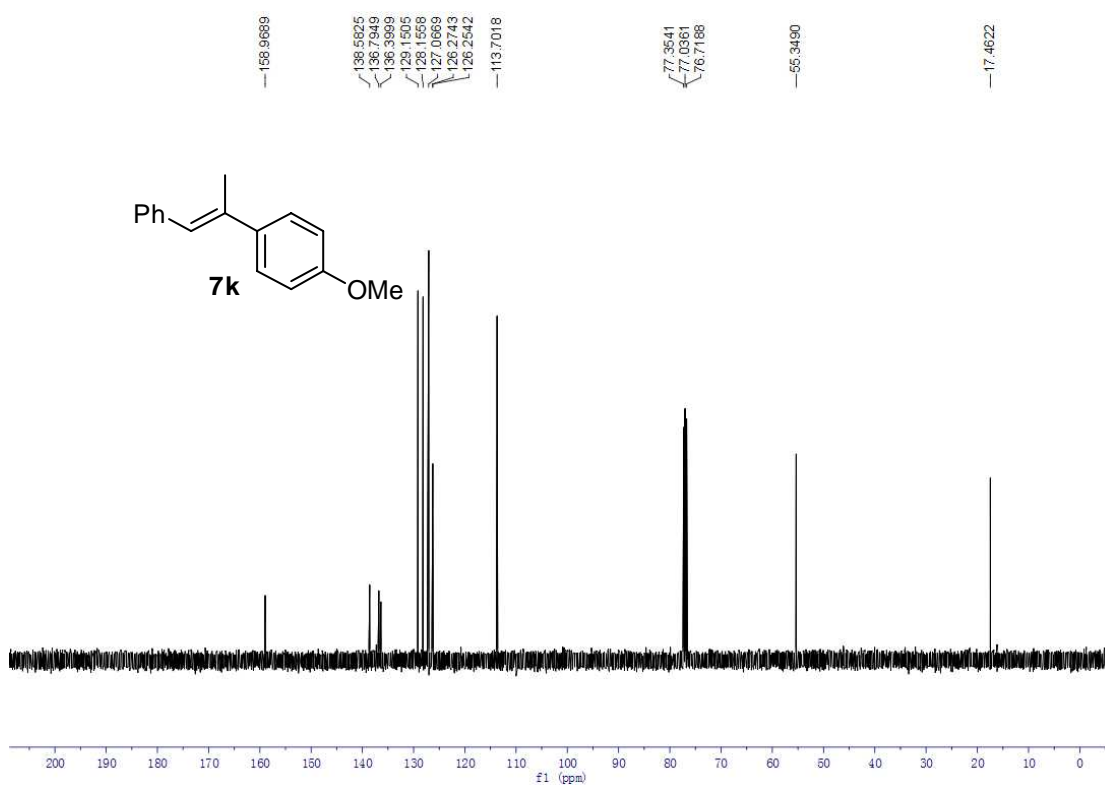

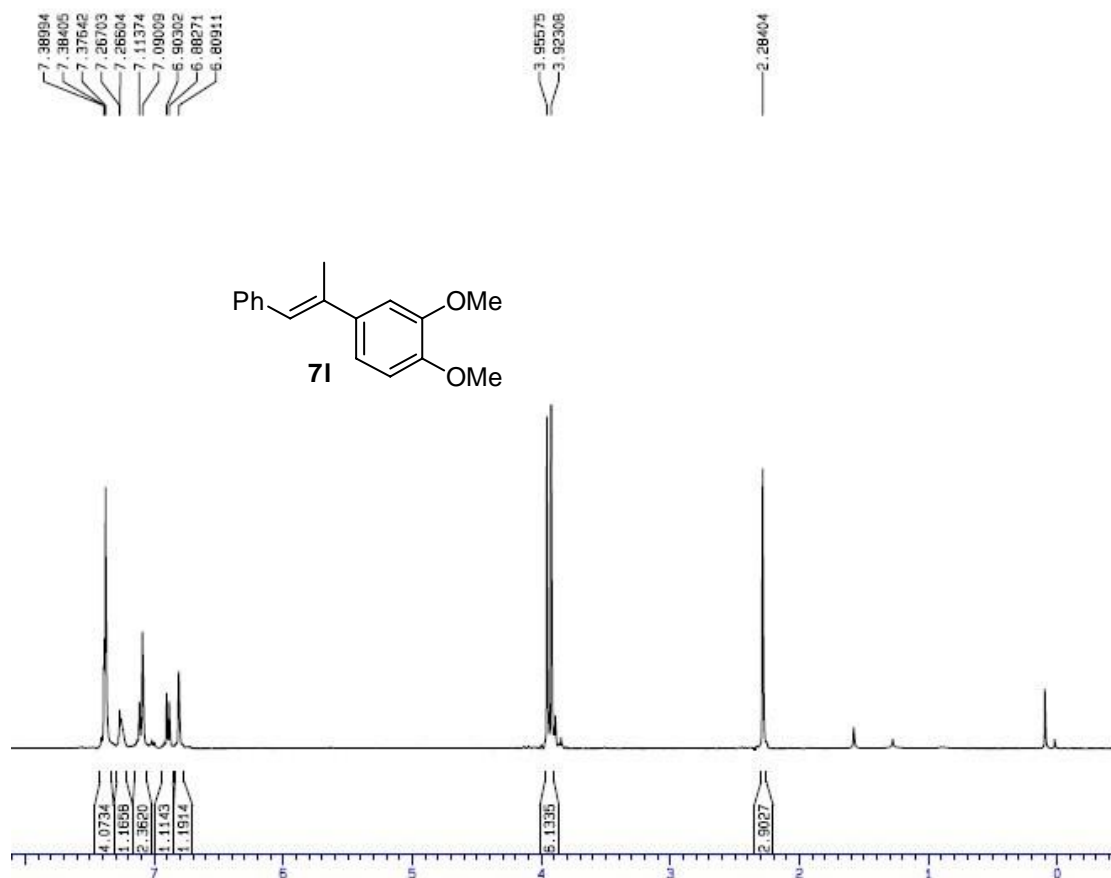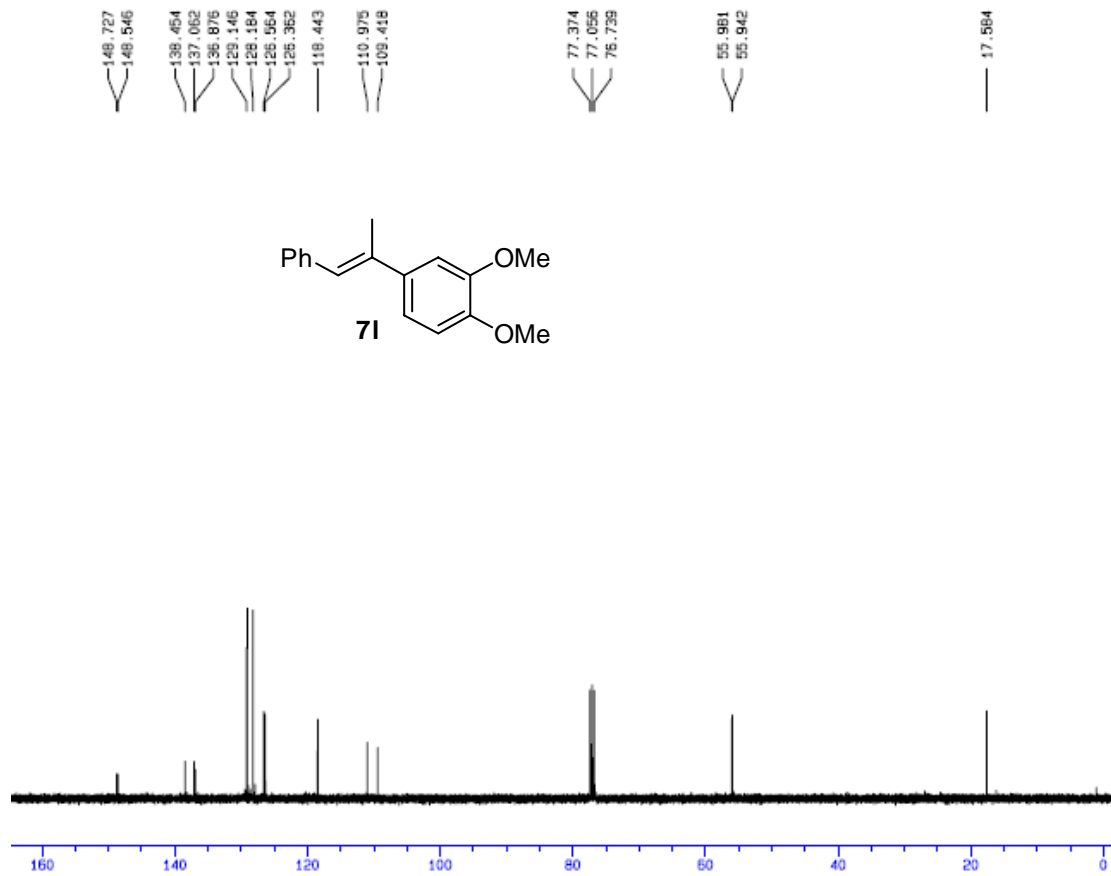

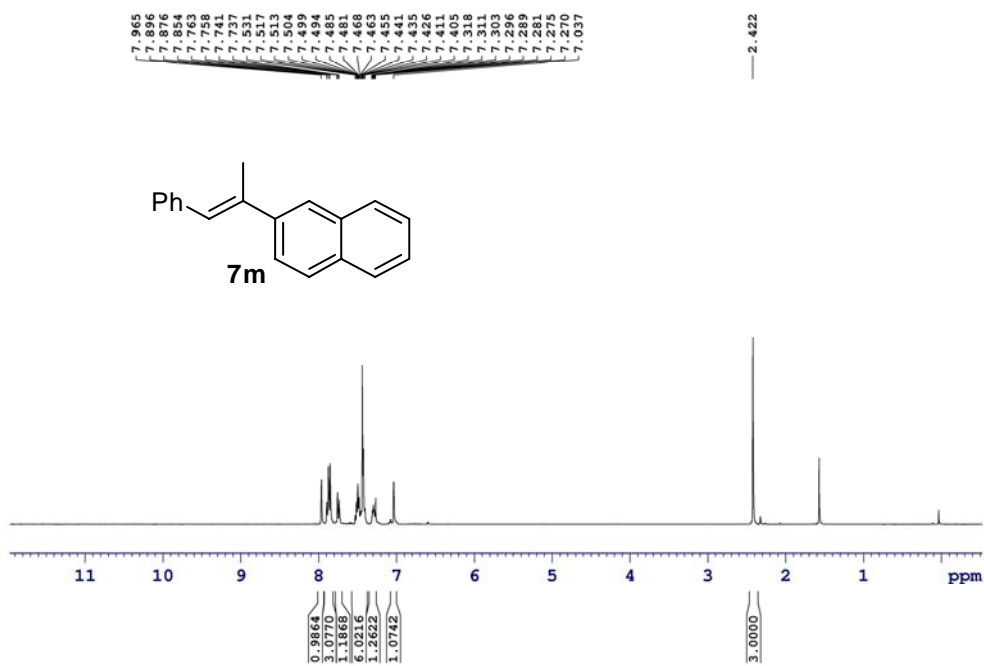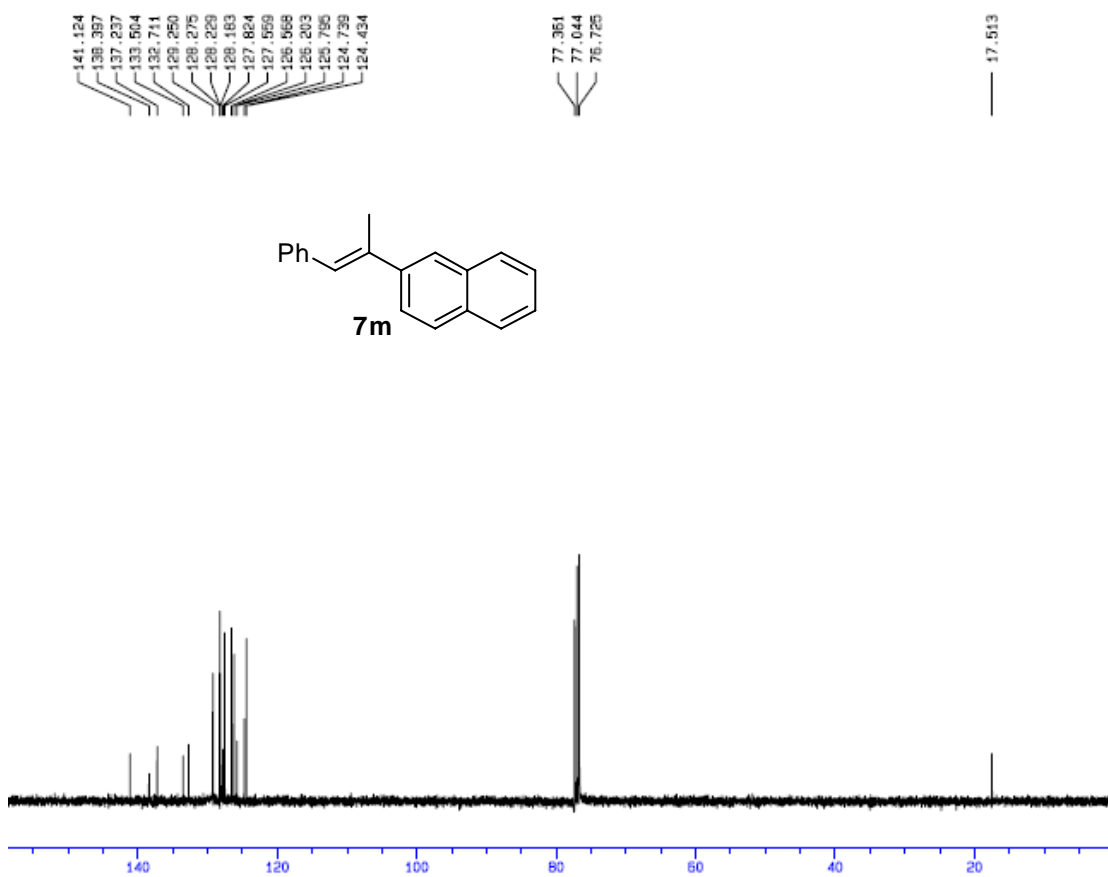



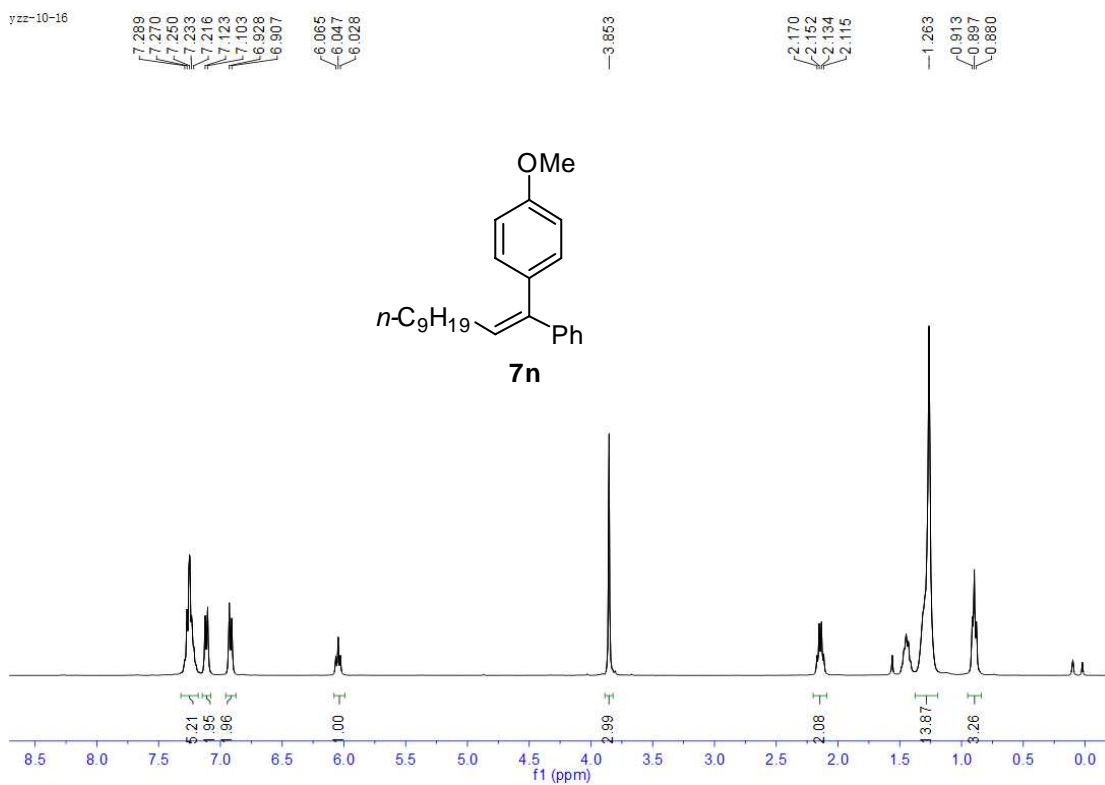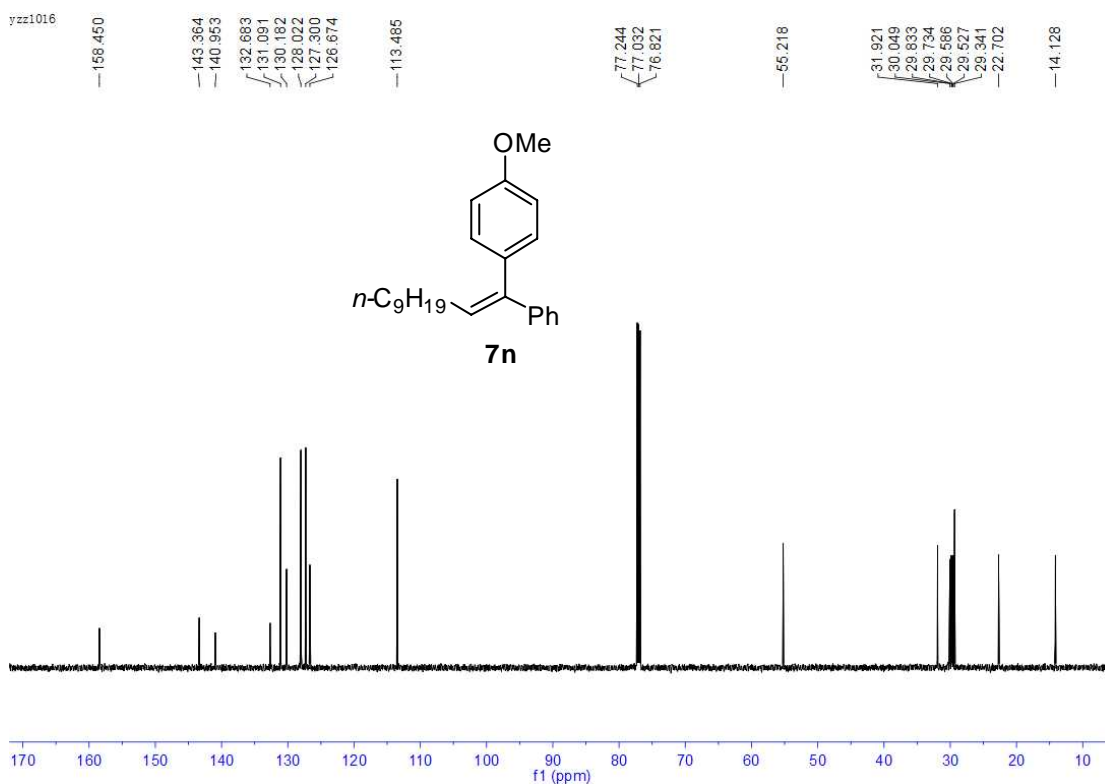

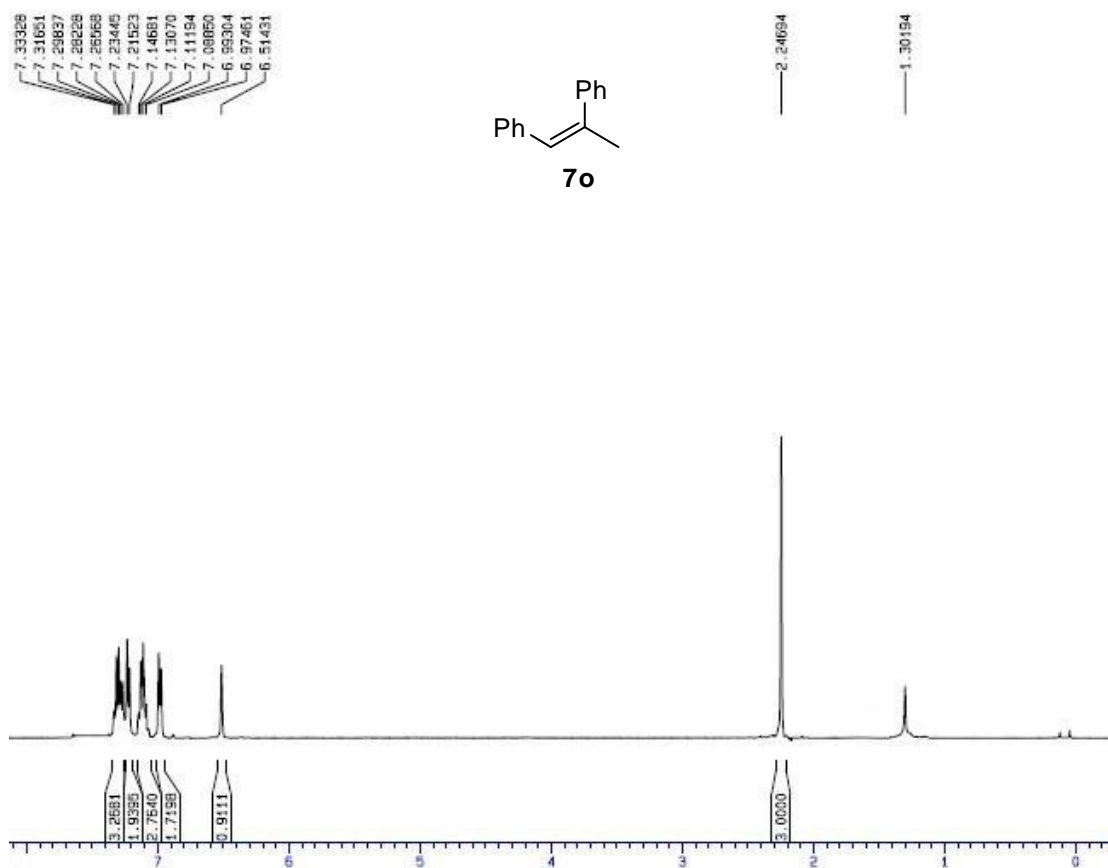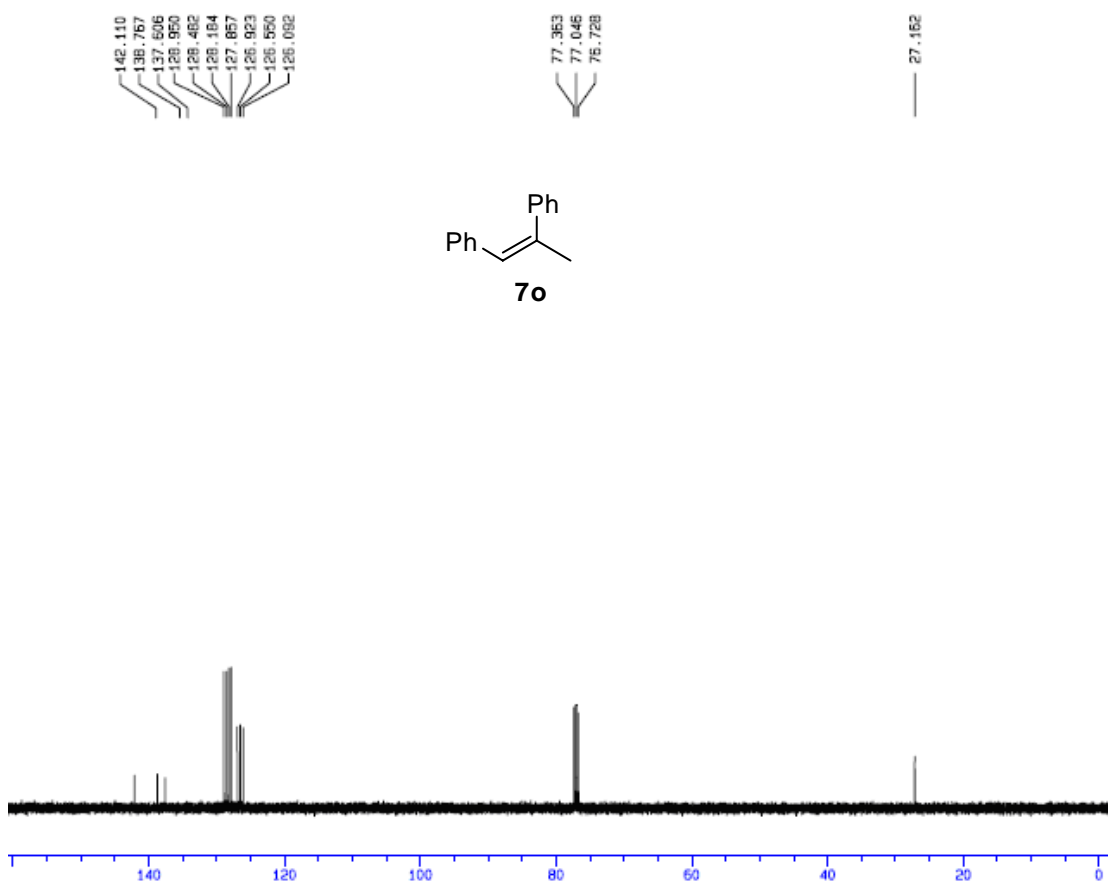

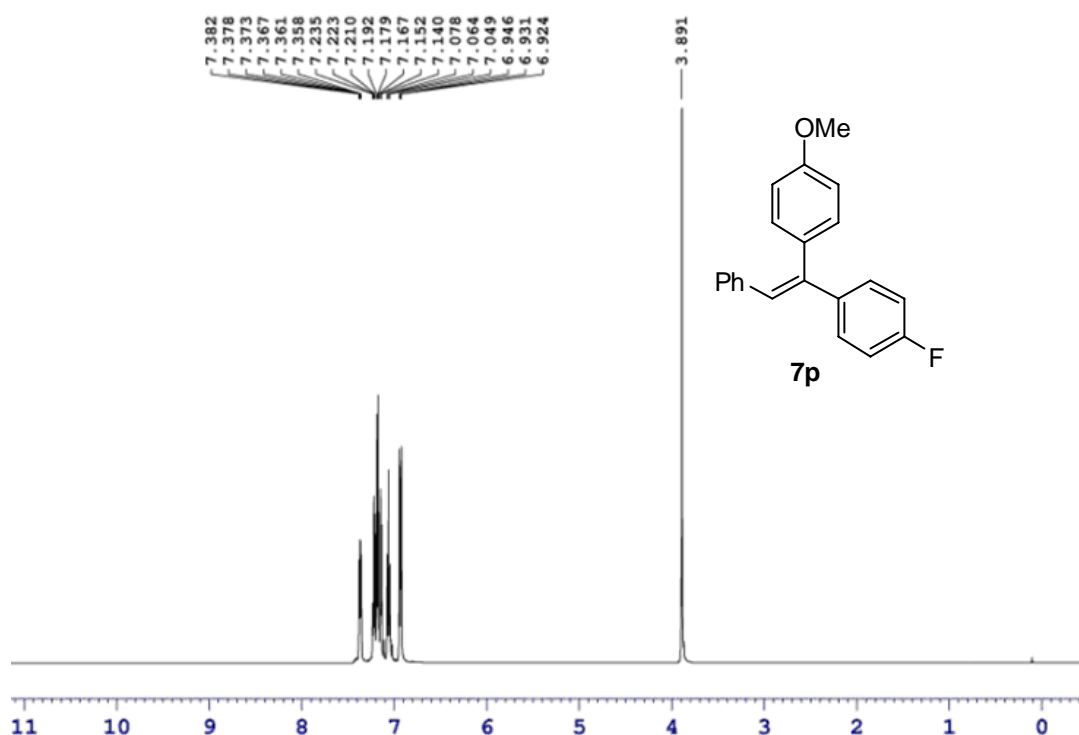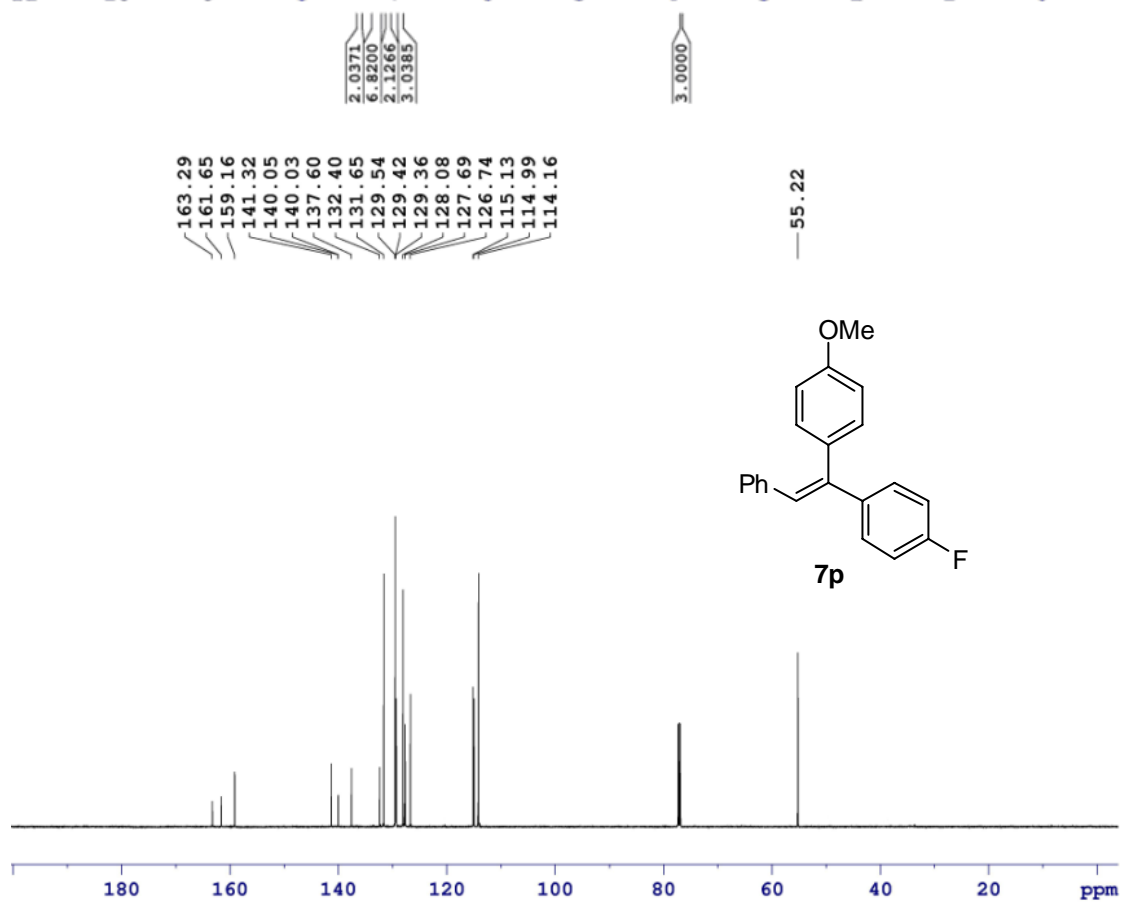

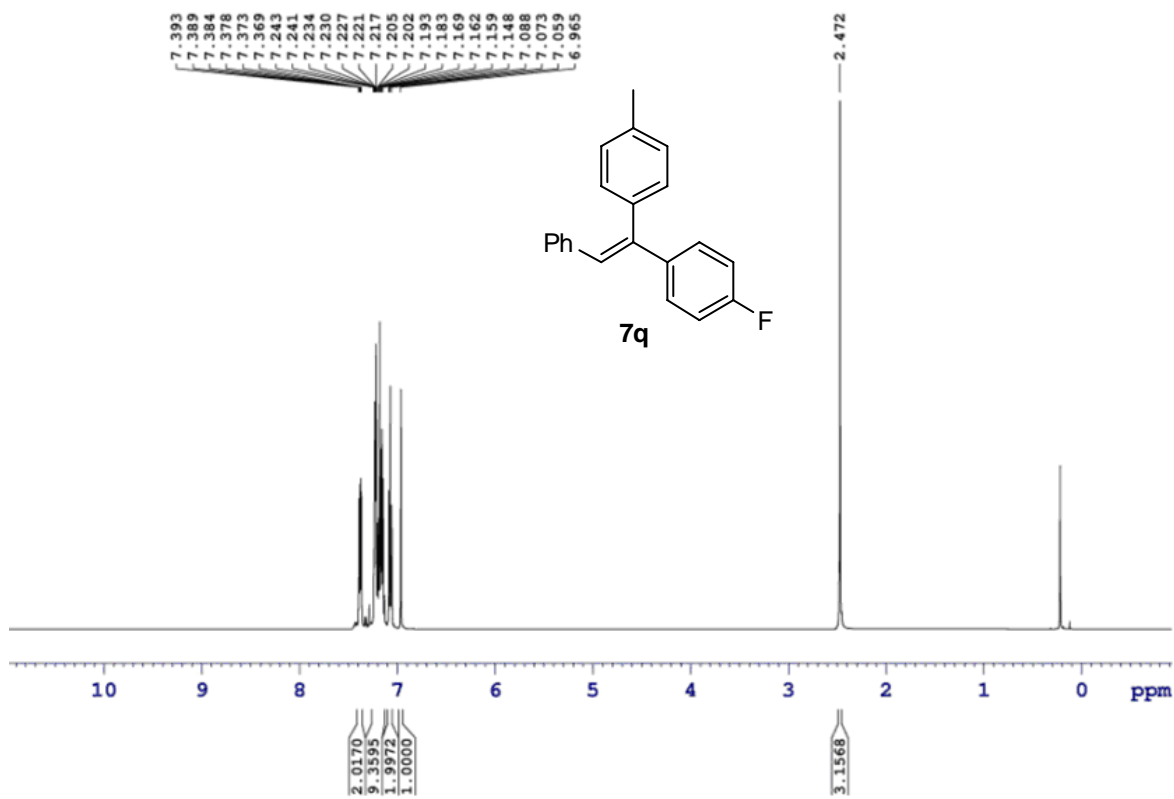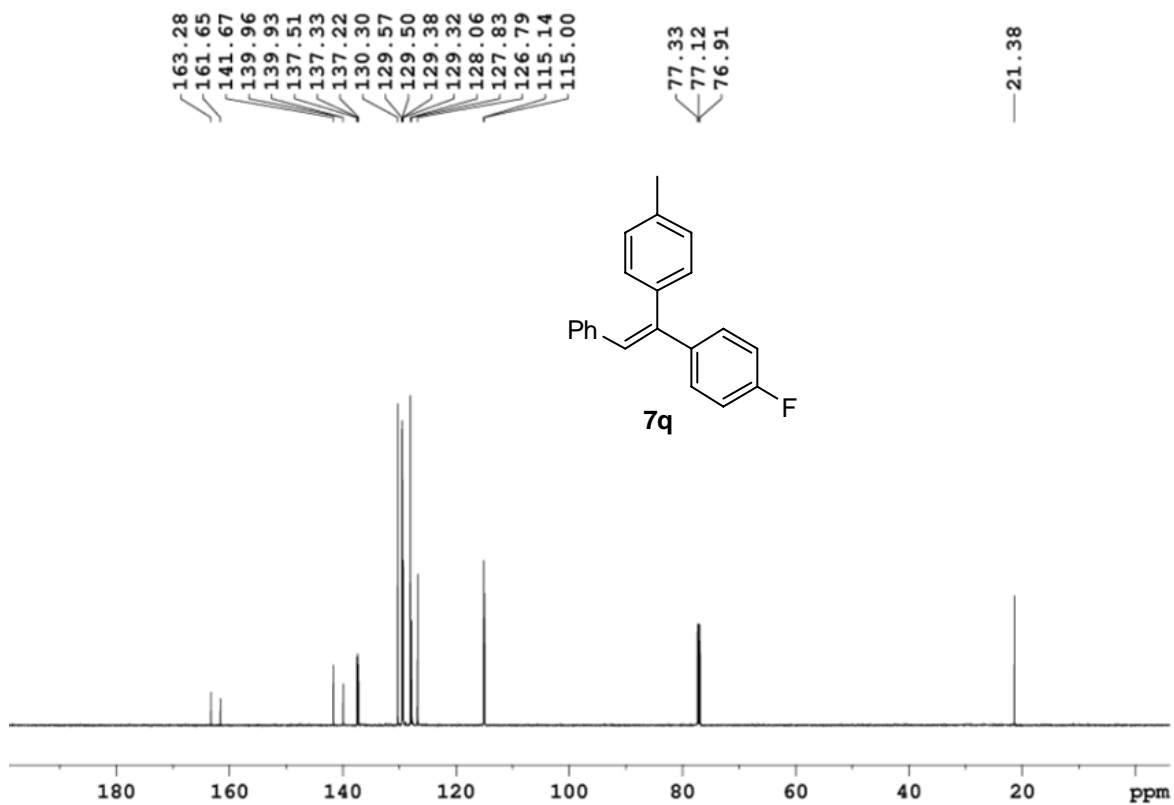

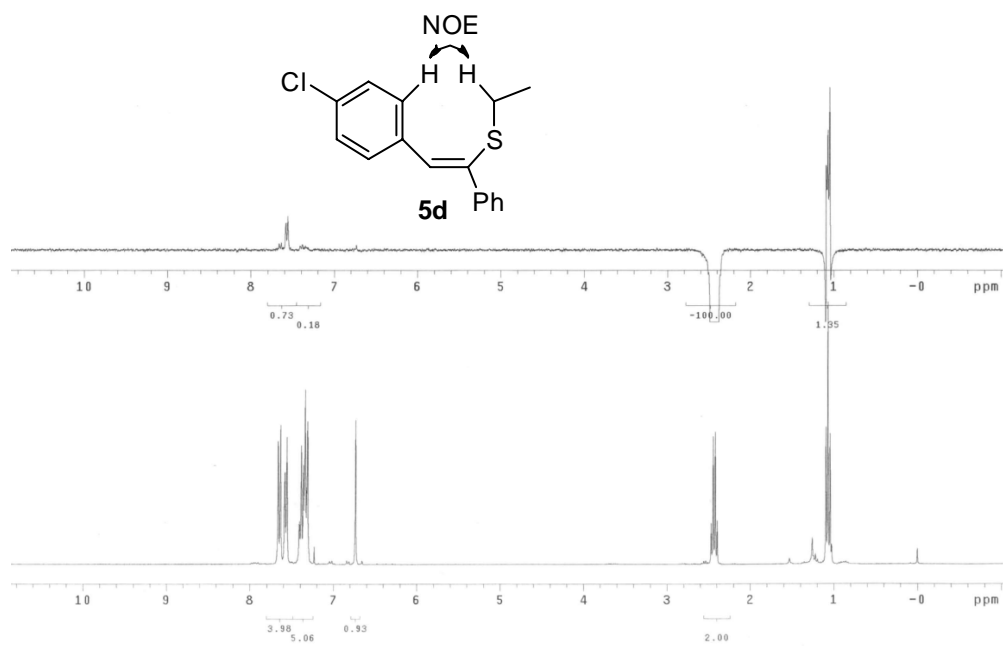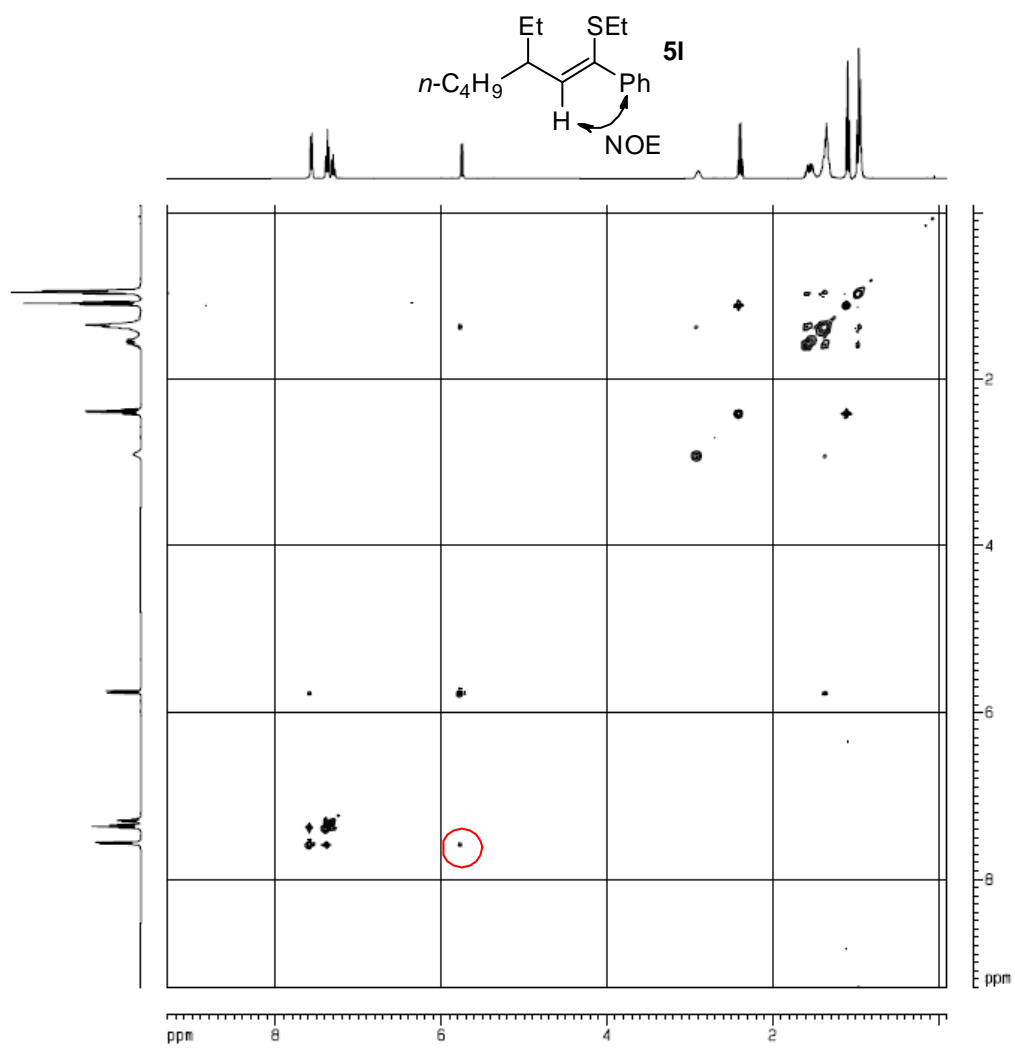

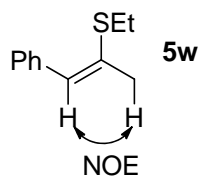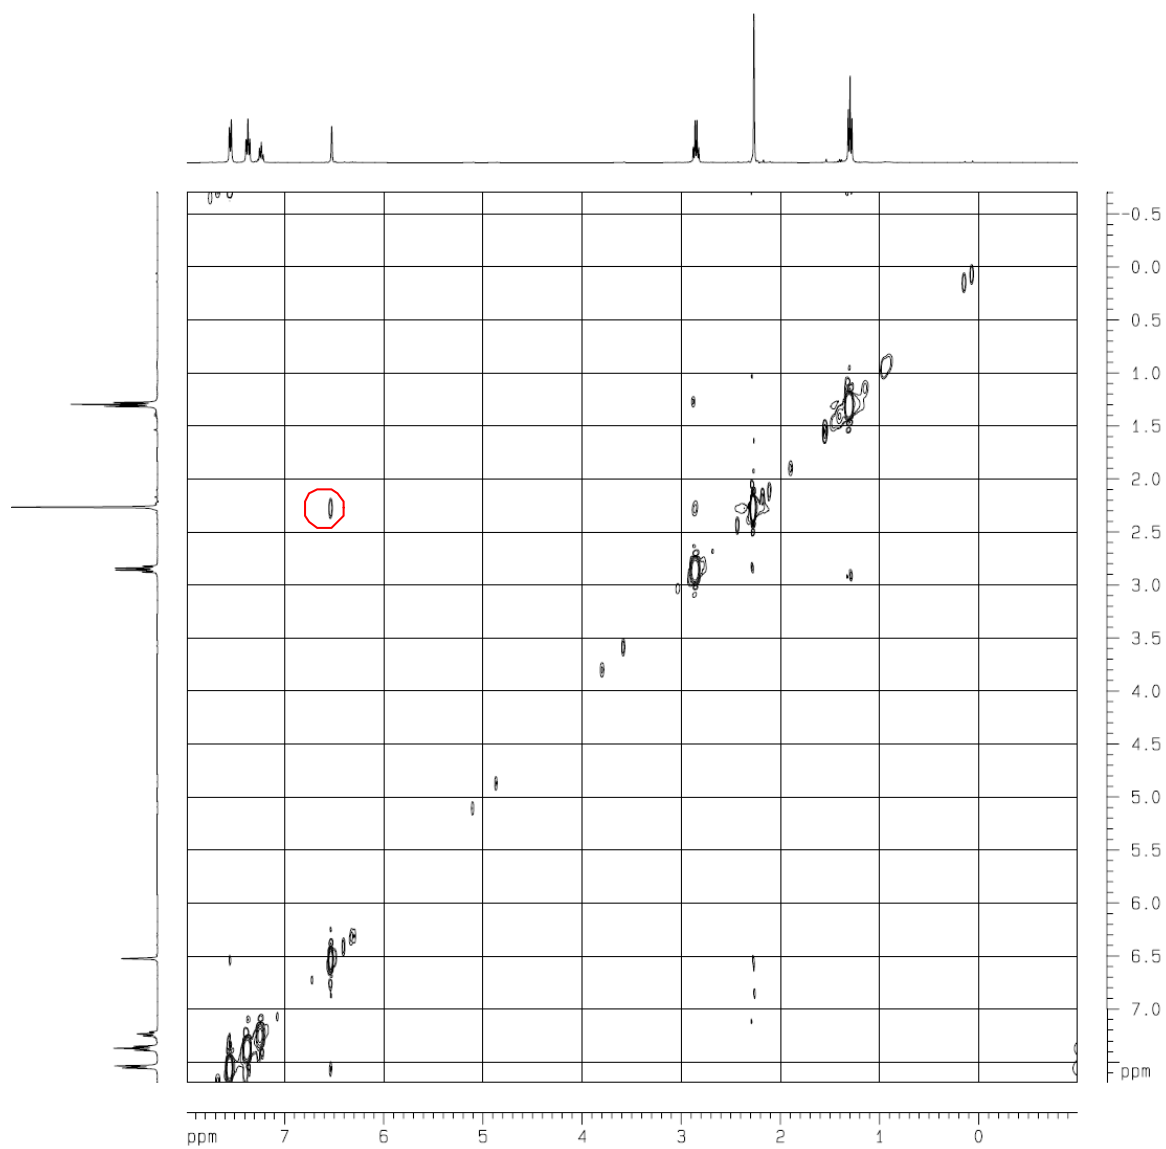

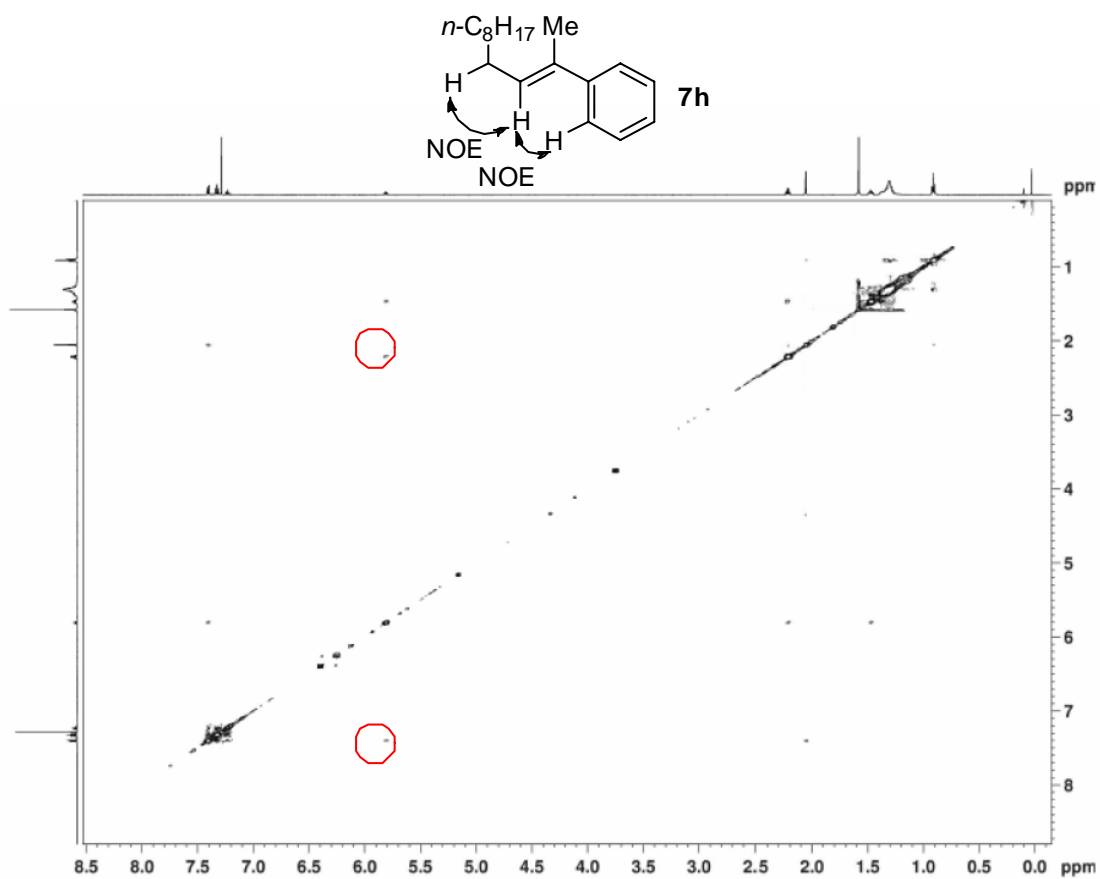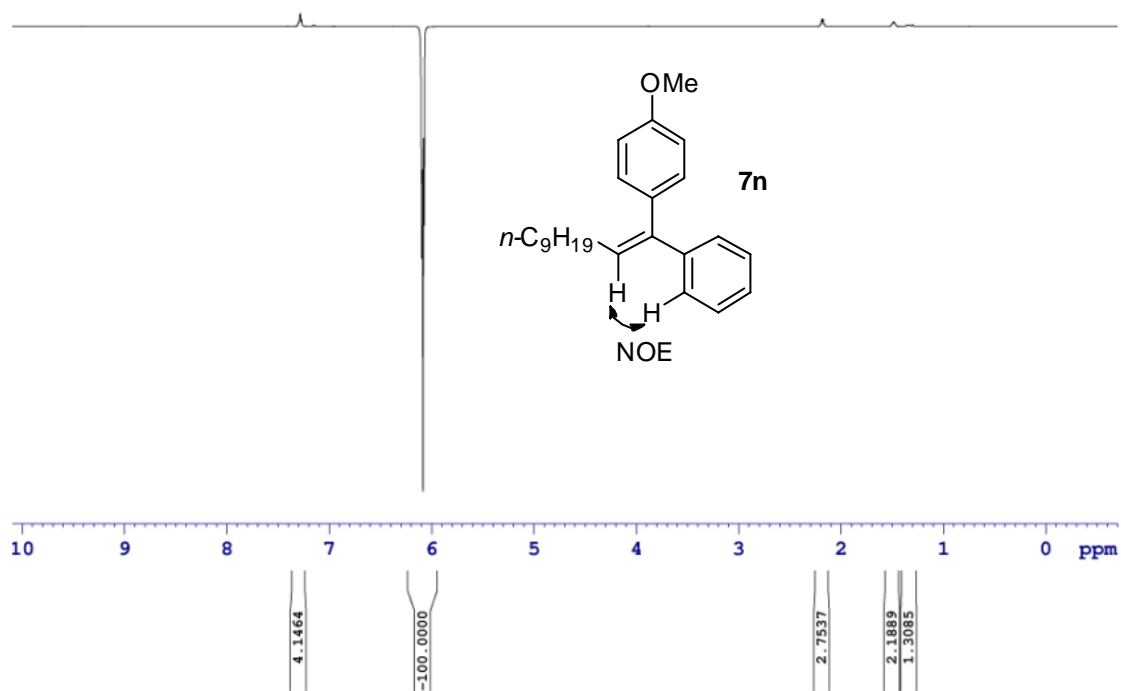

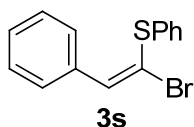

Crystal data for **3s** (C<sub>14</sub>H<sub>11</sub>BrS, 291.20) orthorhombic, space group *P2(1)2(1)2(1)*, *a* = 6.0206(4) Å, *b* = 10.2488(7) Å, *c* = 20.3688(13) Å, volume = 1256.83(14) Å<sup>3</sup>, *Z* = 4, specimen 0.403 × 0.204 × 0.057 mm<sup>3</sup>, *T* = 296(2) K, SIEMENS P4 diffractometer, absorption coefficient 3.405 mm<sup>-1</sup>, reflections collected 8909, independent reflections 2206 [R(int) = 0.0350], refinement by full-matrix least-squares on *F*<sup>2</sup>, data/restraints/parameters 2206/0/145, goodness-of-fit on *F*<sup>2</sup> = 1.059, final *R* indices [*I* > 2σ(*I*)] R1 = 0.0353, wR2 = 0.0740, *R* indices (all data) R1 = 0.0682, wR2 = 0.0815, largest diff peak and hole 0.573 and -0.371 eÅ<sup>-3</sup>. CCDC 902936 (**3s**) contains the supplementary crystallographic data for this paper. These data can be obtained free of charge from the Cambridge Crystallographic Data Centre via [www.ccdc.cam.ac.uk/data\\_request/cif](http://www.ccdc.cam.ac.uk/data_request/cif).



## checkCIF/PLATON report

You have not supplied any structure factors. As a result the full set of tests cannot be run.

No syntax errors found.    CIF dictionary    Interpreting this report

### Datablock: a

---

Bond precision:    C-C = 0.0072 Å                      Wavelength=0.71073  
Cell:                      a=6.0206(4)              b=10.2488(7)              c=20.3688(13)  
                                    alpha=90              beta=90              gamma=90  
Temperature:              296 K

|                        | Calculated   | Reported     |
|------------------------|--------------|--------------|
| Volume                 | 1256.84(14)  | 1256.83(14)  |
| Space group            | P 21 21 21   | P 21 21 21   |
| Hall group             | P 2ac 2ab    | P 2ac 2ab    |
| Moiety formula         | C14 H11 Br S | C14 H11 Br S |
| Sum formula            | C14 H11 Br S | C14 H11 Br S |
| Mr                     | 291.20       | 291.20       |
| Dx, g cm <sup>-3</sup> | 1.539        | 1.539        |
| Z                      | 4            | 4            |
| Mu (mm <sup>-1</sup> ) | 3.405        | 3.405        |
| F000                   | 584.0        | 584.0        |
| F000'                  | 583.54       |              |
| h,k,lmax               | 7,12,24      | 7,12,24      |
| Nref                   | 1312 [ 2206] | 2206         |
| Tmin,Tmax              | 0.439,0.824  | 0.924,0.970  |
| Tmin'                  | 0.251        |              |

Correction method= EMPIRICAL

Data completeness= 1.68/1.00                      Theta(max)= 24.980

R(reflections)= 0.0353( 1546)                      wR2(reflections)= 0.0815( 2206)

S = 1.059                                              Npar= 145

---

The following ALERTS were generated. Each ALERT has the format

**test-name\_ALERT\_alert-type\_alert-level.**

Click on the hyperlinks for more details of the test.

---

#### Alert level C

|                   |                       |                                  |            |
|-------------------|-----------------------|----------------------------------|------------|
| PLAT241_ALERT_2_C | Check High            | Ueq as Compared to Neighbors for | S2         |
| PLAT242_ALERT_2_C | Check Low             | Ueq as Compared to Neighbors for | C9         |
| PLAT341_ALERT_3_C | Low Bond Precision on | C-C Bonds .....                  | 0.0072 Ang |

Datablock a - ellipsoid plot

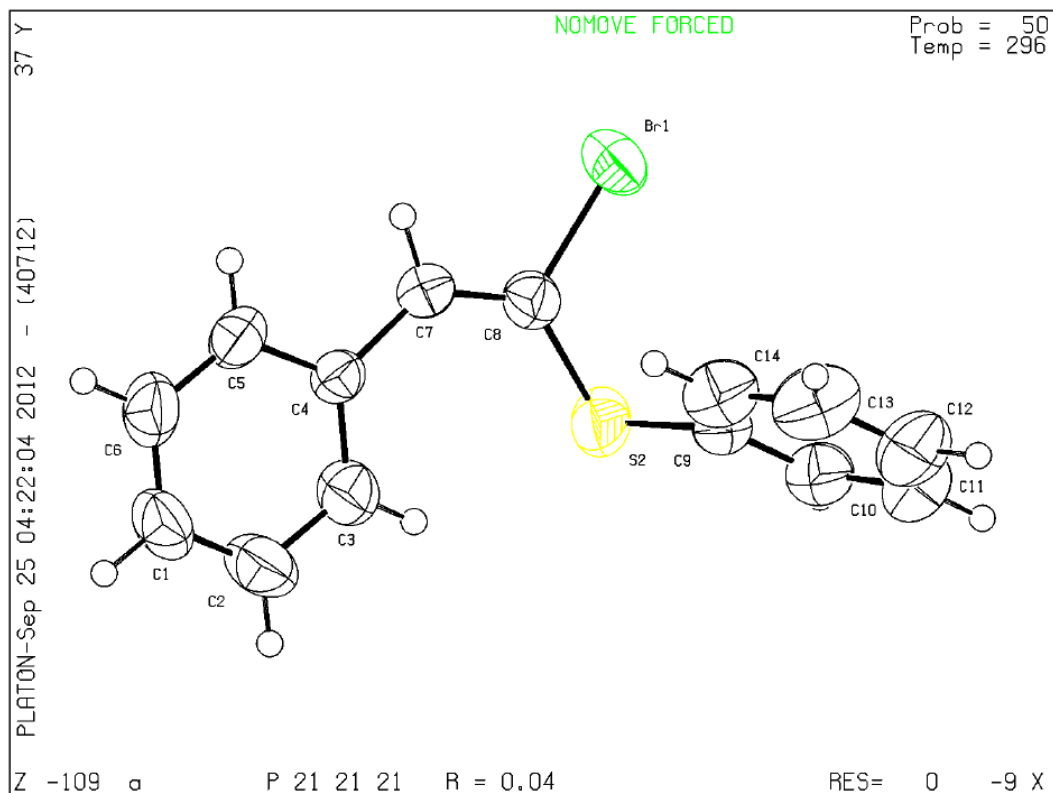

Supplement: c3ob27307e.pdf [file c3ob27307e.pdf]
